# Supplementary material
Source: HighWire-hosted journal article supplement (https://jitc.bmj.com/content/10/9/e004446)
Supplement: inline-supplementary-material-1 [file inline-supplementary-material-1.xlsx]

## Sheet: Supplementary Table 1
Supplementary Table 1
Antibodies used in all flow cytometry panels
Antigen	Clone	Fluorophore	Manufacturer	Catalog #
CAR	anti-id 1A7	APC	NCI, Novus Biologics	NCI, 705-0010
CCR7	G043H7	Brilliant Violet 711	Biolegend	353228
CCR7	G043H7	Brilliant Violet 650	Biolegend	353234
CD19	HIB19	APC-Fire 750	Biolegend	302258
CD3	OKT3	AlexaFluor 488	Biolegend	304017
CD3	OKT3	Brilliant Violet 785	Biolegend	300472
CD3	OKT3	PE-Dazzle594	Biolegend	317346
CD3	OKT3	AlexaFluor 488	Biolegend	317310
CD4	OKT4	Brilliant Violet 711	Biolegend	317440
CD4	OKT4	PE-Cyanine5	Biolegend	317412
CD45RA	HI100	PE-Cyanine7	Biolegend	304125
CD62L	DREG56	Brilliant Violet 605	Biolegend	304834
CD62L	DREG56	PE	Biolegend	304840
CD69	FN50	PE-Dazzle594	Biolegend	310941
CD8	SK1	PerCP-eFluor710	ThermoFisher	46-0087-42
CD95	DX2	AlexaFluor 700	Biolegend	305648
GD2	14G2a	APC	Biolegend	357305
Human CD45	HI30	Pacific Blue	Biolegend	304022
IgG2a	RMG2a-62	APC	Biolegend	407109
LAG3	3DS223H	PE	ThermoFisher	17-2239-42
Mouse CD45.1	A20	PE-Cyanine7	Biolegend	110730
PD1	EH12.2H7	AlexaFluor 488	Biolegend	329936
TCR α/β	IP26	BV421	Biolegend	306721
TCR α/β	IP26	AlexaFluor 488	Biolegend	306712
TIM3	F38-2E2	Brilliant Violet 510	Biolegend	345030
Mouse Lyt2	53-6.7	AlexaFluor 488	Biolegend	100726
GhostRedTM780	Viability	-	Tonbo Biosciences	13-0865-T100
Human CD45	HI30	BUV395	BD Biosciences	563791
Live/Dead Blue	Viability	-	ThermoFisher	L34961A
CD3	UCHT1	BUV496	ThermoFisher	612941
CD39	TU66	BUV661	Biolegend	749967
CD8	RPA-T8	BUV805	BD Biosciences	749366
TCR	IP26	BV421	Biolegend	306721
CD19	HIB19	PacBlue	Biolegend	302223
CD45RO	UCHL1	BV480	Fisher	566192
mCD45	30-F11	BV510	Biolegend	103137
CD62L	DREG-56	BV605	Biolegend	304833
CD28	CD28.2	BV650	Biolegend	302945
CD95	DX2	BV711	Biolegend	305643
PD1	EH12.2H7	BV785	Biolegend	329929
TIM3	7D3	BB515	Fisher	565569
CD4	SK3	Spark Blue 550	Biolegend	344655
TIGIT	MBSA43	Per-CP-efluor710	ThermoFisher	46-9500-41
CD57	HNK-1	PE	Biolegend	359611
CD45RA	HI100	PE/Fire700	Biolegend	304171
CXCR3	G025H7	Pe-Cy7	Biolegend	353719
CCR7	G043H7	Spark NIR 685	Biolegend	353257
LAG3	T47-530	APC-R700	Fisher	565774
CD27	M-T271	APC-H7	Fisher	560223
HLA-DR	L243	APC/Fire810	Biolegend	307673

## Sheet: Supplementary Table 2
Supplementary Table 2
gRNAs and primers (5' --> 3')
Oligo	Sequence
TRAC crRNA	CAGGGTTCTGGATATCTGT
TRAC Donor FWD primer	CCTTTTTCCCATGCCTGCCTTT
TRAC Donor REV primer	TAAGGCCGAGACCACCAATCAG
TRAC Donor FWD primer 2 (long homology arms)	TCGAGTAAACGGTAGTGCTGGG
TRAC Donor REV primer 2 (long homology arms)	CCTCTCCTGCCACCTTCTCTTC
TRAC sequencing FWD primer	ACACTCTTTCCCTACACGACGCTCTTCCGATCT
TRAC sequencing REV primer	GTGACTGGAGTTCAGACGTGTGCTCTTCCGATCT
TRAC genomic integration FWD primer	ATCTTGTGCGCATGTGAGGGGC
TRAC genomic integration REV primer	GCAAGCCAGGACTCCACCAACC

## Sheet: Supplementary Table 3
Supplementary Table 3
CHANGE-seq off target analysis for TRAC gRNA
Chromosome	Start	End	Genomic Coordinate	Nuclease_Read_Count	Strand	Control_Read_Count	Site_Sequence	Site_Substitution_Number	Site_Sequence_Gaps_Allowed	File_Name	Cell	Target_site	Full_Name	Target_Sequence	Realigned_Target_Sequence
chr10	105617429	105617451	chr10:105617429-105617451	32	-	0	CAGAAATCAAGATATCTTTAGG	6		CRL1684_TRAC_Tcell_19bp.bam	None	None	None_None_chr10:105617429-105617451_32	CAGGGTTCTGGATATCTGTNGG	none
chr10	107323641	107323663	chr10:107323641-107323663	6	-	0	CAGGGTTCTGGATATAGGGTAT	5		CRL1684_TRAC_Tcell_19bp.bam	None	None	None_None_chr10:107323641-107323663_6	CAGGGTTCTGGATATCTGTNGG	none
chr10	107786834	107786856	chr10:107786834-107786856	8	+	0	CATGATTTGGGATATCTGGTGG	5		CRL1684_TRAC_Tcell_19bp.bam	None	None	None_None_chr10:107786834-107786856_8	CAGGGTTCTGGATATCTGTNGG	none
chr10	108583110	108583132	chr10:108583110-108583132	92	-	0	CTGCCCTCAGGATCTCTGTGGG	6		CRL1684_TRAC_Tcell_19bp.bam	None	None	None_None_chr10:108583110-108583132_92	CAGGGTTCTGGATATCTGTNGG	none
chr10	109612297	109612319	chr10:109612297-109612319	20	-	0	CAGGGTCAGAGACATCTTTAGG	6		CRL1684_TRAC_Tcell_19bp.bam	None	None	None_None_chr10:109612297-109612319_20	CAGGGTTCTGGATATCTGTNGG	none
chr10	109974616	109974638	chr10:109974616-109974638	18	+	0	AGGAGTTCTAAATATCTATGGG	6		CRL1684_TRAC_Tcell_19bp.bam	None	None	None_None_chr10:109974616-109974638_18	CAGGGTTCTGGATATCTGTNGG	none
chr10	119524451	119524473	chr10:119524451-119524473	24	+	0	CAGGGGAATGGACATCTGTTGG	4		CRL1684_TRAC_Tcell_19bp.bam	None	None	None_None_chr10:119524451-119524473_24	CAGGGTTCTGGATATCTGTNGG	none
chr10	122576123	122576145	chr10:122576123-122576145	34	+	0	AAGGGTCATGTGTATCTCTAGG	6		CRL1684_TRAC_Tcell_19bp.bam	None	None	None_None_chr10:122576123-122576145_34	CAGGGTTCTGGATATCTGTNGG	none
chr10	122784394	122784416	chr10:122784394-122784416	18	-	0	AAACACACTGGATATCTGTTGG	6		CRL1684_TRAC_Tcell_19bp.bam	None	None	None_None_chr10:122784394-122784416_18	CAGGGTTCTGGATATCTGTNGG	none
chr10	124504910	124504932	chr10:124504910-124504932	8	+	0	CGGGGCTGTGGATTCCTGGTGG	6		CRL1684_TRAC_Tcell_19bp.bam	None	None	None_None_chr10:124504910-124504932_8	CAGGGTTCTGGATATCTGTNGG	none
chr10	125886181	125886203	chr10:125886181-125886203	10	-	0	TAGCCATTTGGATATCTGAGGG	6		CRL1684_TRAC_Tcell_19bp.bam	None	None	None_None_chr10:125886181-125886203_10	CAGGGTTCTGGATATCTGTNGG	none
chr10	125973534	125973555	chr10:125973534-125973555	46	-	0			CAGGGTTCTAGATA-CTGAGGG	CRL1684_TRAC_Tcell_19bp.bam	None	None	None_None_chr10:125973534-125973555_46	CAGGGTTCTGGATATCTGTNGG	CAGGGTTCTGGATATCTGTNGG
chr10	128624793	128624815	chr10:128624793-128624815	8	+	0	CATAGTTCTAGGTGTCTCTGGG	6		CRL1684_TRAC_Tcell_19bp.bam	None	None	None_None_chr10:128624793-128624815_8	CAGGGTTCTGGATATCTGTNGG	none
chr10	1866202	1866224	chr10:1866202-1866224	24	+	0	CGAGGGTTTTGGTATCTGTGGG	6	GAGGGTTTTGG-TATCTGTGGG	CRL1684_TRAC_Tcell_19bp.bam	None	None	None_None_chr10:1866202-1866224_24	CAGGGTTCTGGATATCTGTNGG	CAGGGTTCTGGATATCTGTNGG
chr10	19634601	19634622	chr10:19634601-19634622	56	+	0			CATTGTTCTGGAT-TCTGTTGG	CRL1684_TRAC_Tcell_19bp.bam	None	None	None_None_chr10:19634601-19634622_56	CAGGGTTCTGGATATCTGTNGG	CAGGGTTCTGGATATCTGTNGG
chr10	20775324	20775346	chr10:20775324-20775346	8	-	0	CAGGTAAGTGATTATCTGTGGG	6		CRL1684_TRAC_Tcell_19bp.bam	None	None	None_None_chr10:20775324-20775346_8	CAGGGTTCTGGATATCTGTNGG	none
chr10	26812230	26812252	chr10:26812230-26812252	14	+	0	AGGGATTAGGGATATCTTTTGG	6	CAGGGATTAGGGATATCTTTTGG	CRL1684_TRAC_Tcell_19bp.bam	None	None	None_None_chr10:26812230-26812252_14	CAGGGTTCTGGATATCTGTNGG	CAGGG-TTCTGGATATCTGTNGG
chr10	27157900	27157922	chr10:27157900-27157922	14	+	0	CCAGGTGCTAGTTATCTGTGGG	5	CAGG-TGCTAGTTATCTGTGGG	CRL1684_TRAC_Tcell_19bp.bam	None	None	None_None_chr10:27157900-27157922_14	CAGGGTTCTGGATATCTGTNGG	CAGGGTTCTGGATATCTGTNGG
chr10	29620181	29620203	chr10:29620181-29620203	34	-	0	CATGGCTATGGATATCTGTAAG	4		CRL1684_TRAC_Tcell_19bp.bam	None	None	None_None_chr10:29620181-29620203_34	CAGGGTTCTGGATATCTGTNGG	none
chr10	31412795	31412817	chr10:31412795-31412817	40	-	0	GATGCTTTCTGATATCTGTTGG	6		CRL1684_TRAC_Tcell_19bp.bam	None	None	None_None_chr10:31412795-31412817_40	CAGGGTTCTGGATATCTGTNGG	none
chr10	31991179	31991201	chr10:31991179-31991201	12	+	0	AGCTGTTCTGGATGTCTGTTGC	6		CRL1684_TRAC_Tcell_19bp.bam	None	None	None_None_chr10:31991179-31991201_12	CAGGGTTCTGGATATCTGTNGG	none
chr10	35698660	35698682	chr10:35698660-35698682	74	+	0	TTCTGTTCTGGATATCTGTGGA	5		CRL1684_TRAC_Tcell_19bp.bam	None	None	None_None_chr10:35698660-35698682_74	CAGGGTTCTGGATATCTGTNGG	none
chr10	42884356	42884378	chr10:42884356-42884378	16	+	0	CAGAGTCCTGGATTACTATGGG	5		CRL1684_TRAC_Tcell_19bp.bam	None	None	None_None_chr10:42884356-42884378_16	CAGGGTTCTGGATATCTGTNGG	none
chr10	43969430	43969452	chr10:43969430-43969452	26	+	0	TTGCGTCCTGGATACCTGTTGG	5		CRL1684_TRAC_Tcell_19bp.bam	None	None	None_None_chr10:43969430-43969452_26	CAGGGTTCTGGATATCTGTNGG	none
chr10	44437797	44437819	chr10:44437797-44437819	12	-	0	ATGGGTTCTCTCTATCTCTCGG	6		CRL1684_TRAC_Tcell_19bp.bam	None	None	None_None_chr10:44437797-44437819_12	CAGGGTTCTGGATATCTGTNGG	none
chr10	46538629	46538651	chr10:46538629-46538651	10	-	0	CAGGTGTGAGTATATCTGTAGG	5		CRL1684_TRAC_Tcell_19bp.bam	None	None	None_None_chr10:46538629-46538651_10	CAGGGTTCTGGATATCTGTNGG	none
chr10	55115978	55116000	chr10:55115978-55116000	14	-	0	AAGGGGTGTAGATACCTGTAGG	5		CRL1684_TRAC_Tcell_19bp.bam	None	None	None_None_chr10:55115978-55116000_14	CAGGGTTCTGGATATCTGTNGG	none
chr10	56196462	56196484	chr10:56196462-56196484	6	+	0	CATTTTTTTATATATCTGTTGG	6		CRL1684_TRAC_Tcell_19bp.bam	None	None	None_None_chr10:56196462-56196484_6	CAGGGTTCTGGATATCTGTNGG	none
chr10	56260769	56260791	chr10:56260769-56260791	14	-	0	CCATGTCCTGGATATCTGTTAG	5	CATG-TCCTGGATATCTGTTAG	CRL1684_TRAC_Tcell_19bp.bam	None	None	None_None_chr10:56260769-56260791_14	CAGGGTTCTGGATATCTGTNGG	CAGGGTTCTGGATATCTGTNGG
chr10	56439762	56439784	chr10:56439762-56439784	6	+	0	GATAGTTCTGAATATCTGAAAG	6		CRL1684_TRAC_Tcell_19bp.bam	None	None	None_None_chr10:56439762-56439784_6	CAGGGTTCTGGATATCTGTNGG	none
chr10	58076968	58076990	chr10:58076968-58076990	38	+	0	CAGAGTCCTGGATACCTGTGAG	4		CRL1684_TRAC_Tcell_19bp.bam	None	None	None_None_chr10:58076968-58076990_38	CAGGGTTCTGGATATCTGTNGG	none
chr10	59290496	59290518	chr10:59290496-59290518	34	-	0	AAGGGTGTTGTATGTATGTGGG	6		CRL1684_TRAC_Tcell_19bp.bam	None	None	None_None_chr10:59290496-59290518_34	CAGGGTTCTGGATATCTGTNGG	none
chr10	60619812	60619833	chr10:60619812-60619833	24	-	0			AATGGTTCTGGAGA-CTGTAGG	CRL1684_TRAC_Tcell_19bp.bam	None	None	None_None_chr10:60619812-60619833_24	CAGGGTTCTGGATATCTGTNGG	CAGGGTTCTGGATATCTGTNGG
chr10	61418035	61418057	chr10:61418035-61418057	24	-	0	TAGGGGAATGAATATCTGTGGG	5		CRL1684_TRAC_Tcell_19bp.bam	None	None	None_None_chr10:61418035-61418057_24	CAGGGTTCTGGATATCTGTNGG	none
chr10	62900591	62900613	chr10:62900591-62900613	16	-	0	CAAGGTTTTAGACATATGTAGG	5		CRL1684_TRAC_Tcell_19bp.bam	None	None	None_None_chr10:62900591-62900613_16	CAGGGTTCTGGATATCTGTNGG	none
chr10	63921044	63921066	chr10:63921044-63921066	50	+	0	CTGGTTCTTGGTTATCTGTGGG	5		CRL1684_TRAC_Tcell_19bp.bam	None	None	None_None_chr10:63921044-63921066_50	CAGGGTTCTGGATATCTGTNGG	none
chr10	65485282	65485304	chr10:65485282-65485304	38	+	0	TTATGGTGTGGATATCTGTGGG	6	TATGGTG-TGGATATCTGTGGG	CRL1684_TRAC_Tcell_19bp.bam	None	None	None_None_chr10:65485282-65485304_38	CAGGGTTCTGGATATCTGTNGG	CAGGGTTCTGGATATCTGTNGG
chr10	71774250	71774272	chr10:71774250-71774272	10	+	0	CTGGTGCCTGGATATCTGCAGG	5		CRL1684_TRAC_Tcell_19bp.bam	None	None	None_None_chr10:71774250-71774272_10	CAGGGTTCTGGATATCTGTNGG	none
chr10	72793473	72793495	chr10:72793473-72793495	10	+	0	CTGGGTTCTGGTTATCTGTTGC	3		CRL1684_TRAC_Tcell_19bp.bam	None	None	None_None_chr10:72793473-72793495_10	CAGGGTTCTGGATATCTGTNGG	none
chr10	76464212	76464234	chr10:76464212-76464234	24	-	0	CAAGATTCAGAATATCTGCCGG	5		CRL1684_TRAC_Tcell_19bp.bam	None	None	None_None_chr10:76464212-76464234_24	CAGGGTTCTGGATATCTGTNGG	none
chr10	79194603	79194625	chr10:79194603-79194625	36	-	0	TAGAGCCCTGGATATCTCTGGG	5		CRL1684_TRAC_Tcell_19bp.bam	None	None	None_None_chr10:79194603-79194625_36	CAGGGTTCTGGATATCTGTNGG	none
chr10	81755588	81755610	chr10:81755588-81755610	12	-	0	TATTGTTCTAATTATCTGTTGG	6		CRL1684_TRAC_Tcell_19bp.bam	None	None	None_None_chr10:81755588-81755610_12	CAGGGTTCTGGATATCTGTNGG	none
chr10	82810227	82810249	chr10:82810227-82810249	12	+	0	TAAGGTTATGGATATGTATTGG	5		CRL1684_TRAC_Tcell_19bp.bam	None	None	None_None_chr10:82810227-82810249_12	CAGGGTTCTGGATATCTGTNGG	none
chr10	89152461	89152483	chr10:89152461-89152483	12	-	0	AAGGTTACTTGATATCTGTAAG	5		CRL1684_TRAC_Tcell_19bp.bam	None	None	None_None_chr10:89152461-89152483_12	CAGGGTTCTGGATATCTGTNGG	none
chr10	93705662	93705684	chr10:93705662-93705684	10	-	0	GATGGTTCTGGATATTTATCGG	4		CRL1684_TRAC_Tcell_19bp.bam	None	None	None_None_chr10:93705662-93705684_10	CAGGGTTCTGGATATCTGTNGG	none
chr10	95126091	95126113	chr10:95126091-95126113	30	+	0	TAAGGAGCTGGCTATCTGTTAG	6		CRL1684_TRAC_Tcell_19bp.bam	None	None	None_None_chr10:95126091-95126113_30	CAGGGTTCTGGATATCTGTNGG	none
chr10	95322164	95322186	chr10:95322164-95322186	12	-	0	GGGGTTTCTGGATATCTCGGGG	5		CRL1684_TRAC_Tcell_19bp.bam	None	None	None_None_chr10:95322164-95322186_12	CAGGGTTCTGGATATCTGTNGG	none
chr10	95829341	95829363	chr10:95829341-95829363	8	+	0	CCTGGTTCTCATTATCTGTTGG	5		CRL1684_TRAC_Tcell_19bp.bam	None	None	None_None_chr10:95829341-95829363_8	CAGGGTTCTGGATATCTGTNGG	none
chr10	97144960	97144982	chr10:97144960-97144982	12	-	0	CTGGGTACTGATTATCTGTGGG	4		CRL1684_TRAC_Tcell_19bp.bam	None	None	None_None_chr10:97144960-97144982_12	CAGGGTTCTGGATATCTGTNGG	none
chr10	9967780	9967802	chr10:9967780-9967802	14	-	0	TAGGCTTCTGGCTAACTGTAGG	4		CRL1684_TRAC_Tcell_19bp.bam	None	None	None_None_chr10:9967780-9967802_14	CAGGGTTCTGGATATCTGTNGG	none
chr11	102184772	102184794	chr11:102184772-102184794	26	+	0	TTAGGCTCTGGTCATCTGTGGG	6		CRL1684_TRAC_Tcell_19bp.bam	None	None	None_None_chr11:102184772-102184794_26	CAGGGTTCTGGATATCTGTNGG	none
chr11	102683207	102683229	chr11:102683207-102683229	14	-	0	GTAGGAACTGGATATCTGTTAG	6		CRL1684_TRAC_Tcell_19bp.bam	None	None	None_None_chr11:102683207-102683229_14	CAGGGTTCTGGATATCTGTNGG	none
chr11	103580312	103580334	chr11:103580312-103580334	36	-	0	GAGCCATGTGGATATCTGAGGG	6		CRL1684_TRAC_Tcell_19bp.bam	None	None	None_None_chr11:103580312-103580334_36	CAGGGTTCTGGATATCTGTNGG	none
chr11	105479736	105479758	chr11:105479736-105479758	6	+	0	GATGATTTAGGATATCTGGTGG	6		CRL1684_TRAC_Tcell_19bp.bam	None	None	None_None_chr11:105479736-105479758_6	CAGGGTTCTGGATATCTGTNGG	none
chr11	10669787	10669809	chr11:10669787-10669809	92	+	0	CAGGATCCTGGTTATCTGGGGG	4		CRL1684_TRAC_Tcell_19bp.bam	None	None	None_None_chr11:10669787-10669809_92	CAGGGTTCTGGATATCTGTNGG	none
chr11	108479436	108479458	chr11:108479436-108479458	44	+	0	ATGAGATATGGATATCTGTAAG	6		CRL1684_TRAC_Tcell_19bp.bam	None	None	None_None_chr11:108479436-108479458_44	CAGGGTTCTGGATATCTGTNGG	none
chr11	11159584	11159606	chr11:11159584-11159606	36	-	0	ATGGGTTTAAGCTATCTGTGGG	6		CRL1684_TRAC_Tcell_19bp.bam	None	None	None_None_chr11:11159584-11159606_36	CAGGGTTCTGGATATCTGTNGG	none
chr11	112561336	112561358	chr11:112561336-112561358	824	+	0	AAGGGCTCTGGACATCTGTTGG	3		CRL1684_TRAC_Tcell_19bp.bam	None	None	None_None_chr11:112561336-112561358_824	CAGGGTTCTGGATATCTGTNGG	none
chr11	11285492	11285514	chr11:11285492-11285514	32	+	0	CCCGGTCCCTGATATCTGTGGG	5		CRL1684_TRAC_Tcell_19bp.bam	None	None	None_None_chr11:11285492-11285514_32	CAGGGTTCTGGATATCTGTNGG	none
chr11	114053150	114053172	chr11:114053150-114053172	10	-	0	AAGGGTTGAGGATATCTGTGAA	5		CRL1684_TRAC_Tcell_19bp.bam	None	None	None_None_chr11:114053150-114053172_10	CAGGGTTCTGGATATCTGTNGG	none
chr11	114782011	114782033	chr11:114782011-114782033	12	-	0	CATGGATTTTGATATCTGTGGG	4		CRL1684_TRAC_Tcell_19bp.bam	None	None	None_None_chr11:114782011-114782033_12	CAGGGTTCTGGATATCTGTNGG	none
chr11	117971439	117971461	chr11:117971439-117971461	8	-	0	ATTAGGTCTGGATATCTTTTGG	6		CRL1684_TRAC_Tcell_19bp.bam	None	None	None_None_chr11:117971439-117971461_8	CAGGGTTCTGGATATCTGTNGG	none
chr11	121193378	121193400	chr11:121193378-121193400	8	-	0	CTGGGCTCAGGTGATCTGTCTG	6		CRL1684_TRAC_Tcell_19bp.bam	None	None	None_None_chr11:121193378-121193400_8	CAGGGTTCTGGATATCTGTNGG	none
chr11	122630530	122630552	chr11:122630530-122630552	12	+	0	TATGGTCCTGGATTACGGTCGG	6		CRL1684_TRAC_Tcell_19bp.bam	None	None	None_None_chr11:122630530-122630552_12	CAGGGTTCTGGATATCTGTNGG	none
chr11	12396029	12396051	chr11:12396029-12396051	8	-	0	CTAGGTGCTTGACATATGTTGG	6		CRL1684_TRAC_Tcell_19bp.bam	None	None	None_None_chr11:12396029-12396051_8	CAGGGTTCTGGATATCTGTNGG	none
chr11	124686677	124686699	chr11:124686677-124686699	16	+	0	CATGGTTCTGAATGTCTGTTGG	3		CRL1684_TRAC_Tcell_19bp.bam	None	None	None_None_chr11:124686677-124686699_16	CAGGGTTCTGGATATCTGTNGG	none
chr11	131147215	131147237	chr11:131147215-131147237	20	+	0	CACTTCTTTGGATATTTGTGGG	6		CRL1684_TRAC_Tcell_19bp.bam	None	None	None_None_chr11:131147215-131147237_20	CAGGGTTCTGGATATCTGTNGG	none
chr11	133323102	133323124	chr11:133323102-133323124	120	+	0	CAGGGATCTGGATACCTGTGGT	3		CRL1684_TRAC_Tcell_19bp.bam	None	None	None_None_chr11:133323102-133323124_120	CAGGGTTCTGGATATCTGTNGG	none
chr11	15782228	15782250	chr11:15782228-15782250	34	+	0	GGGGGCACTGGATATCTGTGGG	4		CRL1684_TRAC_Tcell_19bp.bam	None	None	None_None_chr11:15782228-15782250_34	CAGGGTTCTGGATATCTGTNGG	none
chr11	16195865	16195887	chr11:16195865-16195887	12	+	0	CCGGGTGCAGTGTATATGTAGG	6		CRL1684_TRAC_Tcell_19bp.bam	None	None	None_None_chr11:16195865-16195887_12	CAGGGTTCTGGATATCTGTNGG	none
chr11	17008327	17008349	chr11:17008327-17008349	12	-	0	CTGGGACTGGGATACCTGTTGG	6		CRL1684_TRAC_Tcell_19bp.bam	None	None	None_None_chr11:17008327-17008349_12	CAGGGTTCTGGATATCTGTNGG	none
chr11	17386031	17386053	chr11:17386031-17386053	40	-	0	CTTGGGGGTGGATATCTTTGGG	6		CRL1684_TRAC_Tcell_19bp.bam	None	None	None_None_chr11:17386031-17386053_40	CAGGGTTCTGGATATCTGTNGG	none
chr11	18834830	18834852	chr11:18834830-18834852	8	+	0	CGGAGTTCTGCCTAGCTGTGGA	6		CRL1684_TRAC_Tcell_19bp.bam	None	None	None_None_chr11:18834830-18834852_8	CAGGGTTCTGGATATCTGTNGG	none
chr11	1918121	1918143	chr11:1918121-1918143	10	-	0	CTGGCCCCTGGATATCTGTGAC	6		CRL1684_TRAC_Tcell_19bp.bam	None	None	None_None_chr11:1918121-1918143_10	CAGGGTTCTGGATATCTGTNGG	none
chr11	20606823	20606845	chr11:20606823-20606845	20	+	0	AAGGCTCTTAAATATCTGTGGG	6		CRL1684_TRAC_Tcell_19bp.bam	None	None	None_None_chr11:20606823-20606845_20	CAGGGTTCTGGATATCTGTNGG	none
chr11	21485180	21485202	chr11:21485180-21485202	66	-	0	TCAGGGTTTGGAAATCTGTGGG	6	CAGGGTT-TGGAAATCTGTGGG	CRL1684_TRAC_Tcell_19bp.bam	None	None	None_None_chr11:21485180-21485202_66	CAGGGTTCTGGATATCTGTNGG	CAGGGTTCTGGATATCTGTNGG
chr11	22994137	22994159	chr11:22994137-22994159	32	+	0	CTGGAGGCTGGATAGCTGTTGG	5		CRL1684_TRAC_Tcell_19bp.bam	None	None	None_None_chr11:22994137-22994159_32	CAGGGTTCTGGATATCTGTNGG	none
chr11	25727054	25727076	chr11:25727054-25727076	6	+	0	TTAGGTCCTGAATATCTGTTAG	6		CRL1684_TRAC_Tcell_19bp.bam	None	None	None_None_chr11:25727054-25727076_6	CAGGGTTCTGGATATCTGTNGG	none
chr11	29735431	29735453	chr11:29735431-29735453	46	-	0	GACTTCCCTGGATATCTGTGGG	6		CRL1684_TRAC_Tcell_19bp.bam	None	None	None_None_chr11:29735431-29735453_46	CAGGGTTCTGGATATCTGTNGG	none
chr11	3135418	3135440	chr11:3135418-3135440	16	-	0	CACGGTTCTGGCTCTCTGTCCC	5		CRL1684_TRAC_Tcell_19bp.bam	None	None	None_None_chr11:3135418-3135440_16	CAGGGTTCTGGATATCTGTNGG	none
chr11	33910938	33910960	chr11:33910938-33910960	136	-	0	TGGGGGTCTGGATATCTGTCAG	4		CRL1684_TRAC_Tcell_19bp.bam	None	None	None_None_chr11:33910938-33910960_136	CAGGGTTCTGGATATCTGTNGG	none
chr11	37189792	37189814	chr11:37189792-37189814	34	-	0	TTAGGTCTTGGATATCTTTGGG	6		CRL1684_TRAC_Tcell_19bp.bam	None	None	None_None_chr11:37189792-37189814_34	CAGGGTTCTGGATATCTGTNGG	none
chr11	37304733	37304755	chr11:37304733-37304755	6	-	0	GATGATTTAGGATATCTGGTGG	6		CRL1684_TRAC_Tcell_19bp.bam	None	None	None_None_chr11:37304733-37304755_6	CAGGGTTCTGGATATCTGTNGG	none
chr11	43021654	43021677	chr11:43021654-43021677	26	-	0			CAGGGGGCTGTATCATCTGTAGG	CRL1684_TRAC_Tcell_19bp.bam	None	None	None_None_chr11:43021654-43021677_26	CAGGGTTCTGGATATCTGTNGG	CAGGGTTCTGGAT-ATCTGTNGG
chr11	43690011	43690033	chr11:43690011-43690033	8	-	0	CAGTCACATGGATATCTGGGGG	6		CRL1684_TRAC_Tcell_19bp.bam	None	None	None_None_chr11:43690011-43690033_8	CAGGGTTCTGGATATCTGTNGG	none
chr11	44583286	44583308	chr11:44583286-44583308	8	+	0	GAGGGCTCCAGGTATCTGCTGG	6		CRL1684_TRAC_Tcell_19bp.bam	None	None	None_None_chr11:44583286-44583308_8	CAGGGTTCTGGATATCTGTNGG	none
chr11	47999594	47999616	chr11:47999594-47999616	8	+	0	GTGGATTCTGGATATCTGGGTG	5		CRL1684_TRAC_Tcell_19bp.bam	None	None	None_None_chr11:47999594-47999616_8	CAGGGTTCTGGATATCTGTNGG	none
chr11	4861513	4861535	chr11:4861513-4861535	6	+	0	ATGTATCCTGGATATCTGTTGT	6		CRL1684_TRAC_Tcell_19bp.bam	None	None	None_None_chr11:4861513-4861535_6	CAGGGTTCTGGATATCTGTNGG	none
chr11	56444773	56444795	chr11:56444773-56444795	14	+	0	CCTTGTAATGGTTATCTGTCGG	6		CRL1684_TRAC_Tcell_19bp.bam	None	None	None_None_chr11:56444773-56444795_14	CAGGGTTCTGGATATCTGTNGG	none
chr11	56657278	56657300	chr11:56657278-56657300	22	+	0	ATTGGTTCTGTTTATATGTTGG	6		CRL1684_TRAC_Tcell_19bp.bam	None	None	None_None_chr11:56657278-56657300_22	CAGGGTTCTGGATATCTGTNGG	none
chr11	60362580	60362602	chr11:60362580-60362602	18	-	0	CTGGGTTGTTTATAACTGTTGG	5		CRL1684_TRAC_Tcell_19bp.bam	None	None	None_None_chr11:60362580-60362602_18	CAGGGTTCTGGATATCTGTNGG	none
chr11	60999291	60999313	chr11:60999291-60999313	60	+	0	CAAGGTCCTGGATATATGGGGG	4		CRL1684_TRAC_Tcell_19bp.bam	None	None	None_None_chr11:60999291-60999313_60	CAGGGTTCTGGATATCTGTNGG	none
chr11	61560511	61560533	chr11:61560511-61560533	8	-	0	AAGGGTCTGGGAAATCTGTGGG	5		CRL1684_TRAC_Tcell_19bp.bam	None	None	None_None_chr11:61560511-61560533_8	CAGGGTTCTGGATATCTGTNGG	none
chr11	64482616	64482638	chr11:64482616-64482638	12	-	0	TTGTGCCCTGGATGTCTGTGGG	6		CRL1684_TRAC_Tcell_19bp.bam	None	None	None_None_chr11:64482616-64482638_12	CAGGGTTCTGGATATCTGTNGG	none
chr11	66723178	66723200	chr11:66723178-66723200	6	+	0	TGAGGTTCAGAATATCTGCTGG	6		CRL1684_TRAC_Tcell_19bp.bam	None	None	None_None_chr11:66723178-66723200_6	CAGGGTTCTGGATATCTGTNGG	none
chr11	71419830	71419852	chr11:71419830-71419852	30	-	0	TAGGGTGCTGGATATCATTGGG	4		CRL1684_TRAC_Tcell_19bp.bam	None	None	None_None_chr11:71419830-71419852_30	CAGGGTTCTGGATATCTGTNGG	none
chr11	72679275	72679297	chr11:72679275-72679297	58	+	0	CAGGTTCCAGGATATCTGTCAG	4		CRL1684_TRAC_Tcell_19bp.bam	None	None	None_None_chr11:72679275-72679297_58	CAGGGTTCTGGATATCTGTNGG	none
chr11	75073713	75073735	chr11:75073713-75073735	12	-	0	TGGGGTTCTGGTTAACTGAGGG	5		CRL1684_TRAC_Tcell_19bp.bam	None	None	None_None_chr11:75073713-75073735_12	CAGGGTTCTGGATATCTGTNGG	none
chr11	76257738	76257760	chr11:76257738-76257760	40	+	0	CTGGGGTCTAGATATCTGTTGA	4		CRL1684_TRAC_Tcell_19bp.bam	None	None	None_None_chr11:76257738-76257760_40	CAGGGTTCTGGATATCTGTNGG	none
chr11	77095804	77095826	chr11:77095804-77095826	16	+	0	GAGGCCTGTGTTTATCTGTGGG	6		CRL1684_TRAC_Tcell_19bp.bam	None	None	None_None_chr11:77095804-77095826_16	CAGGGTTCTGGATATCTGTNGG	none
chr11	79921167	79921189	chr11:79921167-79921189	6	-	0	TGAGGTTCCAGATATATGTAGG	6		CRL1684_TRAC_Tcell_19bp.bam	None	None	None_None_chr11:79921167-79921189_6	CAGGGTTCTGGATATCTGTNGG	none
chr11	80342547	80342569	chr11:80342547-80342569	12	-	0	ATGAGGTCTGGGTAGCTGTGGG	6		CRL1684_TRAC_Tcell_19bp.bam	None	None	None_None_chr11:80342547-80342569_12	CAGGGTTCTGGATATCTGTNGG	none
chr11	84385503	84385525	chr11:84385503-84385525	14	-	0	CAGTACTCTAAATATCTGTGGA	6		CRL1684_TRAC_Tcell_19bp.bam	None	None	None_None_chr11:84385503-84385525_14	CAGGGTTCTGGATATCTGTNGG	none
chr11	85485803	85485824	chr11:85485803-85485824	44	-	0			CAGGGCTCAG-ATACCTGTGGG	CRL1684_TRAC_Tcell_19bp.bam	None	None	None_None_chr11:85485803-85485824_44	CAGGGTTCTGGATATCTGTNGG	CAGGGTTCTGGATATCTGTNGG
chr11	87177286	87177308	chr11:87177286-87177308	14	+	0	TAGAGTTCTGTATATCTAATGG	5		CRL1684_TRAC_Tcell_19bp.bam	None	None	None_None_chr11:87177286-87177308_14	CAGGGTTCTGGATATCTGTNGG	none
chr11	87360912	87360934	chr11:87360912-87360934	16	+	0	GTCTGATCTGAATATCTGTGGG	6		CRL1684_TRAC_Tcell_19bp.bam	None	None	None_None_chr11:87360912-87360934_16	CAGGGTTCTGGATATCTGTNGG	none
chr11	89633609	89633631	chr11:89633609-89633631	16	+	0	GAGAATAGTGGATATCTGTCAG	6		CRL1684_TRAC_Tcell_19bp.bam	None	None	None_None_chr11:89633609-89633631_16	CAGGGTTCTGGATATCTGTNGG	none
chr11	9226293	9226315	chr11:9226293-9226315	8	-	0	TAGGGTTCTAGATAATTTTGGG	5		CRL1684_TRAC_Tcell_19bp.bam	None	None	None_None_chr11:9226293-9226315_8	CAGGGTTCTGGATATCTGTNGG	none
chr11	93340270	93340292	chr11:93340270-93340292	20	+	6	TAGACATCTGGATATCTGGGGG	5		CRL1684_TRAC_Tcell_19bp.bam	None	None	None_None_chr11:93340270-93340292_20	CAGGGTTCTGGATATCTGTNGG	none
chr11	93477915	93477937	chr11:93477915-93477937	12	-	0	GCTGATTATGGAGATCTGTGGG	6		CRL1684_TRAC_Tcell_19bp.bam	None	None	None_None_chr11:93477915-93477937_12	CAGGGTTCTGGATATCTGTNGG	none
chr11	95688836	95688858	chr11:95688836-95688858	12	-	0	AGTGATTCTGGGTATCTGTGGA	6		CRL1684_TRAC_Tcell_19bp.bam	None	None	None_None_chr11:95688836-95688858_12	CAGGGTTCTGGATATCTGTNGG	none
chr11	96878625	96878647	chr11:96878625-96878647	10	+	0	CAGGCATATGCATACCTGTGGG	5		CRL1684_TRAC_Tcell_19bp.bam	None	None	None_None_chr11:96878625-96878647_10	CAGGGTTCTGGATATCTGTNGG	none
chr11	97219436	97219458	chr11:97219436-97219458	138	+	0	ATGGGGGTTGGATATCTGCAGG	6		CRL1684_TRAC_Tcell_19bp.bam	None	None	None_None_chr11:97219436-97219458_138	CAGGGTTCTGGATATCTGTNGG	none
chr11	98617162	98617184	chr11:98617162-98617184	32	-	0	AAGTTCTCAAGATATCTGTTGG	6		CRL1684_TRAC_Tcell_19bp.bam	None	None	None_None_chr11:98617162-98617184_32	CAGGGTTCTGGATATCTGTNGG	none
chr11	99946186	99946208	chr11:99946186-99946208	10	-	0	AGGAGAACTGTATATCTGTAGG	6		CRL1684_TRAC_Tcell_19bp.bam	None	None	None_None_chr11:99946186-99946208_10	CAGGGTTCTGGATATCTGTNGG	none
chr11	99974647	99974669	chr11:99974647-99974669	14	+	0	TGGGGTTATGGTGATCTGTCGG	5		CRL1684_TRAC_Tcell_19bp.bam	None	None	None_None_chr11:99974647-99974669_14	CAGGGTTCTGGATATCTGTNGG	none
chr12	105786674	105786695	chr12:105786674-105786695	16	+	0			CAGGGCTCAGGA-ATCTATAGG	CRL1684_TRAC_Tcell_19bp.bam	None	None	None_None_chr12:105786674-105786695_16	CAGGGTTCTGGATATCTGTNGG	CAGGGTTCTGGATATCTGTNGG
chr12	109173517	109173539	chr12:109173517-109173539	14	-	0	GAGAGTCCTGGGTAACTGTCAG	6		CRL1684_TRAC_Tcell_19bp.bam	None	None	None_None_chr12:109173517-109173539_14	CAGGGTTCTGGATATCTGTNGG	none
chr12	109514437	109514459	chr12:109514437-109514459	360	-	0	CAGGGCTCTGGATTTCTATGGG	3		CRL1684_TRAC_Tcell_19bp.bam	None	None	None_None_chr12:109514437-109514459_360	CAGGGTTCTGGATATCTGTNGG	none
chr12	111087736	111087758	chr12:111087736-111087758	32	+	0	ATGTGTGATGGATATCTGTTGA	6		CRL1684_TRAC_Tcell_19bp.bam	None	None	None_None_chr12:111087736-111087758_32	CAGGGTTCTGGATATCTGTNGG	none
chr12	122528644	122528666	chr12:122528644-122528666	622	-	0	CTAGGGTTTTGGTATCTGTGGG	6	TAGGGTTTTGG-TATCTGTGGG	CRL1684_TRAC_Tcell_19bp.bam	None	None	None_None_chr12:122528644-122528666_622	CAGGGTTCTGGATATCTGTNGG	CAGGGTTCTGGATATCTGTNGG
chr12	124126404	124126426	chr12:124126404-124126426	8	+	0	TTAGGATGTGGATATCTGTGGG	5	TAGGATG-TGGATATCTGTGGG	CRL1684_TRAC_Tcell_19bp.bam	None	None	None_None_chr12:124126404-124126426_8	CAGGGTTCTGGATATCTGTNGG	CAGGGTTCTGGATATCTGTNGG
chr12	124185236	124185258	chr12:124185236-124185258	16	-	0	AAAGGCCGTGGATATCTGTGGG	5		CRL1684_TRAC_Tcell_19bp.bam	None	None	None_None_chr12:124185236-124185258_16	CAGGGTTCTGGATATCTGTNGG	none
chr12	124428984	124429006	chr12:124428984-124429006	12	+	0	CTGCTTCCTGGCCATCTGTGGG	6		CRL1684_TRAC_Tcell_19bp.bam	None	None	None_None_chr12:124428984-124429006_12	CAGGGTTCTGGATATCTGTNGG	none
chr12	124473869	124473891	chr12:124473869-124473891	28	+	0	CAGAGTCCTGGACATCTGTCAG	4		CRL1684_TRAC_Tcell_19bp.bam	None	None	None_None_chr12:124473869-124473891_28	CAGGGTTCTGGATATCTGTNGG	none
chr12	128246215	128246237	chr12:128246215-128246237	24	-	0	CTGGGCTCCTGATAGCTGTGGC	6		CRL1684_TRAC_Tcell_19bp.bam	None	None	None_None_chr12:128246215-128246237_24	CAGGGTTCTGGATATCTGTNGG	none
chr12	130902567	130902589	chr12:130902567-130902589	14	+	0	ATGGTTTCTGGATTTCTGTTGG	4	CATGGTTTCTGGATTTCTGTTGG	CRL1684_TRAC_Tcell_19bp.bam	None	None	None_None_chr12:130902567-130902589_14	CAGGGTTCTGGATATCTGTNGG	CAGGGTT-CTGGATATCTGTNGG
chr12	132461520	132461542	chr12:132461520-132461542	20	+	0	CTTGGTTCCTGACAGCTGTGGG	6		CRL1684_TRAC_Tcell_19bp.bam	None	None	None_None_chr12:132461520-132461542_20	CAGGGTTCTGGATATCTGTNGG	none
chr12	16162684	16162706	chr12:16162684-16162706	14	-	0	CAGCTTCTTGGATATATGTTGG	5		CRL1684_TRAC_Tcell_19bp.bam	None	None	None_None_chr12:16162684-16162706_14	CAGGGTTCTGGATATCTGTNGG	none
chr12	16443763	16443785	chr12:16443763-16443785	16	+	0	CAGGGTACTTTATTTCTCTTGG	5		CRL1684_TRAC_Tcell_19bp.bam	None	None	None_None_chr12:16443763-16443785_16	CAGGGTTCTGGATATCTGTNGG	none
chr12	19965518	19965540	chr12:19965518-19965540	36	+	0	CAGGATCCCAGATATCAGTGGG	5		CRL1684_TRAC_Tcell_19bp.bam	None	None	None_None_chr12:19965518-19965540_36	CAGGGTTCTGGATATCTGTNGG	none
chr12	2367415	2367437	chr12:2367415-2367437	6	-	0	TATGCTTCTGGATATCTGTGTG	4		CRL1684_TRAC_Tcell_19bp.bam	None	None	None_None_chr12:2367415-2367437_6	CAGGGTTCTGGATATCTGTNGG	none
chr12	39338872	39338894	chr12:39338872-39338894	32	-	0	CTGCCTTGAGGATGTCTGTTGG	6		CRL1684_TRAC_Tcell_19bp.bam	None	None	None_None_chr12:39338872-39338894_32	CAGGGTTCTGGATATCTGTNGG	none
chr12	3976818	3976840	chr12:3976818-3976840	26	-	0	AAAGGTTCAGAATATCTGTAAG	5		CRL1684_TRAC_Tcell_19bp.bam	None	None	None_None_chr12:3976818-3976840_26	CAGGGTTCTGGATATCTGTNGG	none
chr12	41047206	41047228	chr12:41047206-41047228	18	-	0	GAGACTCCTGGGTTTCTGTAGG	6		CRL1684_TRAC_Tcell_19bp.bam	None	None	None_None_chr12:41047206-41047228_18	CAGGGTTCTGGATATCTGTNGG	none
chr12	43621950	43621971	chr12:43621950-43621971	6	+	0			CAGGGCT-TGGATACCTGTGAG	CRL1684_TRAC_Tcell_19bp.bam	None	None	None_None_chr12:43621950-43621971_6	CAGGGTTCTGGATATCTGTNGG	CAGGGTTCTGGATATCTGTNGG
chr12	49633979	49634001	chr12:49633979-49634001	8	-	0	CAGGTTCCAGGAGGCCTGTGGG	6		CRL1684_TRAC_Tcell_19bp.bam	None	None	None_None_chr12:49633979-49634001_8	CAGGGTTCTGGATATCTGTNGG	none
chr12	52268380	52268402	chr12:52268380-52268402	8	+	0	CAGTGCTGTGAATATCTGTGAG	5		CRL1684_TRAC_Tcell_19bp.bam	None	None	None_None_chr12:52268380-52268402_8	CAGGGTTCTGGATATCTGTNGG	none
chr12	54912664	54912686	chr12:54912664-54912686	10	-	0	CTCTGTGCTAGAAATCTGTGGG	6		CRL1684_TRAC_Tcell_19bp.bam	None	None	None_None_chr12:54912664-54912686_10	CAGGGTTCTGGATATCTGTNGG	none
chr12	56942944	56942966	chr12:56942944-56942966	12	-	0	CAGAGTTCCACAGATCTCTAGG	6		CRL1684_TRAC_Tcell_19bp.bam	None	None	None_None_chr12:56942944-56942966_12	CAGGGTTCTGGATATCTGTNGG	none
chr12	59667552	59667574	chr12:59667552-59667574	6	+	0	GAGAGATTAGGATATCTGGTGG	6		CRL1684_TRAC_Tcell_19bp.bam	None	None	None_None_chr12:59667552-59667574_6	CAGGGTTCTGGATATCTGTNGG	none
chr12	62829672	62829694	chr12:62829672-62829694	6	-	0	GGTGGTTCCCAATATCTGTGGG	6		CRL1684_TRAC_Tcell_19bp.bam	None	None	None_None_chr12:62829672-62829694_6	CAGGGTTCTGGATATCTGTNGG	none
chr12	63428082	63428104	chr12:63428082-63428104	16	-	0	GATGATTTGGGGTATCTGTTGG	6		CRL1684_TRAC_Tcell_19bp.bam	None	None	None_None_chr12:63428082-63428104_16	CAGGGTTCTGGATATCTGTNGG	none
chr12	64073510	64073531	chr12:64073510-64073531	26	-	0			TCGGGTTTTGG-TATCTGTGGG	CRL1684_TRAC_Tcell_19bp.bam	None	None	None_None_chr12:64073510-64073531_26	CAGGGTTCTGGATATCTGTNGG	CAGGGTTCTGGATATCTGTNGG
chr12	70239644	70239666	chr12:70239644-70239666	22	+	0	TTGTGTTAAGGATATCTGTTGA	6		CRL1684_TRAC_Tcell_19bp.bam	None	None	None_None_chr12:70239644-70239666_22	CAGGGTTCTGGATATCTGTNGG	none
chr12	72700389	72700411	chr12:72700389-72700411	8	-	0	GATGATTGAGGATATCTGATGG	6		CRL1684_TRAC_Tcell_19bp.bam	None	None	None_None_chr12:72700389-72700411_8	CAGGGTTCTGGATATCTGTNGG	none
chr12	75719988	75720010	chr12:75719988-75720010	18	+	0	CAAGGGTAAGAATATCTATTGG	6		CRL1684_TRAC_Tcell_19bp.bam	None	None	None_None_chr12:75719988-75720010_18	CAGGGTTCTGGATATCTGTNGG	none
chr12	76686728	76686750	chr12:76686728-76686750	22	+	0	AAGCTATCAGGATATCTATCGG	6		CRL1684_TRAC_Tcell_19bp.bam	None	None	None_None_chr12:76686728-76686750_22	CAGGGTTCTGGATATCTGTNGG	none
chr12	76904355	76904377	chr12:76904355-76904377	700	-	0	ATGGGTTCTAGACATCTGTGGG	4		CRL1684_TRAC_Tcell_19bp.bam	None	None	None_None_chr12:76904355-76904377_700	CAGGGTTCTGGATATCTGTNGG	none
chr12	7896300	7896322	chr12:7896300-7896322	8	-	0	TACTAGTCTGGATATCTTTAGG	6		CRL1684_TRAC_Tcell_19bp.bam	None	None	None_None_chr12:7896300-7896322_8	CAGGGTTCTGGATATCTGTNGG	none
chr12	91926852	91926874	chr12:91926852-91926874	12	-	0	CAGAATTGTTTATATTTGTGGG	6		CRL1684_TRAC_Tcell_19bp.bam	None	None	None_None_chr12:91926852-91926874_12	CAGGGTTCTGGATATCTGTNGG	none
chr12	92139180	92139201	chr12:92139180-92139201	26	+	0			CACAATT-TGGATATCTGTTGG	CRL1684_TRAC_Tcell_19bp.bam	None	None	None_None_chr12:92139180-92139201_26	CAGGGTTCTGGATATCTGTNGG	CAGGGTTCTGGATATCTGTNGG
chr12	94917344	94917366	chr12:94917344-94917366	28	+	0	CTGGGCAAAGGATATCTGTGGG	5		CRL1684_TRAC_Tcell_19bp.bam	None	None	None_None_chr12:94917344-94917366_28	CAGGGTTCTGGATATCTGTNGG	none
chr12	99274007	99274029	chr12:99274007-99274029	10	-	0	AAGGGTTCTGAGAATCTAAGGG	6		CRL1684_TRAC_Tcell_19bp.bam	None	None	None_None_chr12:99274007-99274029_10	CAGGGTTCTGGATATCTGTNGG	none
chr13	103864460	103864482	chr13:103864460-103864482	6	+	0	AAAGATTCTAGATCTCTGTGGG	5		CRL1684_TRAC_Tcell_19bp.bam	None	None	None_None_chr13:103864460-103864482_6	CAGGGTTCTGGATATCTGTNGG	none
chr13	104122827	104122849	chr13:104122827-104122849	10	+	0	GATGATTTAGGGTATCTGTTGG	6		CRL1684_TRAC_Tcell_19bp.bam	None	None	None_None_chr13:104122827-104122849_10	CAGGGTTCTGGATATCTGTNGG	none
chr13	106275728	106275750	chr13:106275728-106275750	6	-	0	AGTGGTTCTGCATATCTGAGGG	5	CAGTGGTTCTGCATATCTGAGGG	CRL1684_TRAC_Tcell_19bp.bam	None	None	None_None_chr13:106275728-106275750_6	CAGGGTTCTGGATATCTGTNGG	CAG-GGTTCTGGATATCTGTNGG
chr13	107156522	107156544	chr13:107156522-107156544	10	-	0	GAGGATTCTGGATATCATGGGC	6	GAGGATTCTGGATATCA-TGGG	CRL1684_TRAC_Tcell_19bp.bam	None	None	None_None_chr13:107156522-107156544_10	CAGGGTTCTGGATATCTGTNGG	CAGGGTTCTGGATATCTGTNGG
chr13	110878480	110878502	chr13:110878480-110878502	26	-	0	GCGGGGTGTGGATATCTGTGGA	5	CGGGGTG-TGGATATCTGTGGA	CRL1684_TRAC_Tcell_19bp.bam	None	None	None_None_chr13:110878480-110878502_26	CAGGGTTCTGGATATCTGTNGG	CAGGGTTCTGGATATCTGTNGG
chr13	112431774	112431796	chr13:112431774-112431796	36	+	0	GAGGATTAGGGTTCTCTGTAGG	6		CRL1684_TRAC_Tcell_19bp.bam	None	None	None_None_chr13:112431774-112431796_36	CAGGGTTCTGGATATCTGTNGG	none
chr13	114325372	114325394	chr13:114325372-114325394	12	-	0	CAGGCTTCCAGATATCTGAGGC	5	CAGGCTTCCAGATATCTG-AGG	CRL1684_TRAC_Tcell_19bp.bam	None	None	None_None_chr13:114325372-114325394_12	CAGGGTTCTGGATATCTGTNGG	CAGGGTTCTGGATATCTGTNGG
chr13	21225351	21225373	chr13:21225351-21225373	18	+	0	CACGGTCCTGAATTTCTGTGGG	4		CRL1684_TRAC_Tcell_19bp.bam	None	None	None_None_chr13:21225351-21225373_18	CAGGGTTCTGGATATCTGTNGG	none
chr13	22979228	22979250	chr13:22979228-22979250	18	+	0	TATGCTCCAGGATATCTGTGTG	6		CRL1684_TRAC_Tcell_19bp.bam	None	None	None_None_chr13:22979228-22979250_18	CAGGGTTCTGGATATCTGTNGG	none
chr13	24617772	24617794	chr13:24617772-24617794	10	+	0	CTGGCCTCCACATATCTGTGGG	6		CRL1684_TRAC_Tcell_19bp.bam	None	None	None_None_chr13:24617772-24617794_10	CAGGGTTCTGGATATCTGTNGG	none
chr13	24687012	24687034	chr13:24687012-24687034	16	-	0	CATCTTTCTGAATAACTGTGGA	6		CRL1684_TRAC_Tcell_19bp.bam	None	None	None_None_chr13:24687012-24687034_16	CAGGGTTCTGGATATCTGTNGG	none
chr13	25654877	25654899	chr13:25654877-25654899	14	+	0	CTCTCTTTGGGATATCTGTTGG	6		CRL1684_TRAC_Tcell_19bp.bam	None	None	None_None_chr13:25654877-25654899_14	CAGGGTTCTGGATATCTGTNGG	none
chr13	26148333	26148355	chr13:26148333-26148355	14	-	0	CAAGGATCTGGGTACCTGTGTG	5		CRL1684_TRAC_Tcell_19bp.bam	None	None	None_None_chr13:26148333-26148355_14	CAGGGTTCTGGATATCTGTNGG	none
chr13	30024796	30024818	chr13:30024796-30024818	22	+	0	CAGGGATCTGAATATCTGGATG	4		CRL1684_TRAC_Tcell_19bp.bam	None	None	None_None_chr13:30024796-30024818_22	CAGGGTTCTGGATATCTGTNGG	none
chr13	31722008	31722030	chr13:31722008-31722030	8	-	0	TAGGGGACTGGAATTCCGTTGG	6		CRL1684_TRAC_Tcell_19bp.bam	None	None	None_None_chr13:31722008-31722030_8	CAGGGTTCTGGATATCTGTNGG	none
chr13	34289967	34289989	chr13:34289967-34289989	116	+	0	CAGGGCTCTAAATATCTGCTAG	5	CAGGGCTCTAAATATCTGCTAGG	CRL1684_TRAC_Tcell_19bp.bam	None	None	None_None_chr13:34289967-34289989_116	CAGGGTTCTGGATATCTGTNGG	CAGGGTTCTGGATATCTG-TNGG
chr13	39211538	39211560	chr13:39211538-39211560	12	-	0	TTGGGTTCTAGACATCTACAGG	6		CRL1684_TRAC_Tcell_19bp.bam	None	None	None_None_chr13:39211538-39211560_12	CAGGGTTCTGGATATCTGTNGG	none
chr13	41518828	41518850	chr13:41518828-41518850	74	+	0	TTAGGGTATGGATATCTGAGGG	6	TAGGGTA-TGGATATCTGAGGG	CRL1684_TRAC_Tcell_19bp.bam	None	None	None_None_chr13:41518828-41518850_74	CAGGGTTCTGGATATCTGTNGG	CAGGGTTCTGGATATCTGTNGG
chr13	42398546	42398568	chr13:42398546-42398568	18	-	0	CAGGACCCTGGATATCAGTTAG	5		CRL1684_TRAC_Tcell_19bp.bam	None	None	None_None_chr13:42398546-42398568_18	CAGGGTTCTGGATATCTGTNGG	none
chr13	45103460	45103482	chr13:45103460-45103482	24	-	0	CATGGTTCAGATTATTTGTTGG	5		CRL1684_TRAC_Tcell_19bp.bam	None	None	None_None_chr13:45103460-45103482_24	CAGGGTTCTGGATATCTGTNGG	none
chr13	47836515	47836537	chr13:47836515-47836537	24	-	0	CTGGGCTCTCCCTAACTGTTGG	6		CRL1684_TRAC_Tcell_19bp.bam	None	None	None_None_chr13:47836515-47836537_24	CAGGGTTCTGGATATCTGTNGG	none
chr13	55177973	55177995	chr13:55177973-55177995	20	+	0	GATGATTTAGGGTATCTGTTGG	6		CRL1684_TRAC_Tcell_19bp.bam	None	None	None_None_chr13:55177973-55177995_20	CAGGGTTCTGGATATCTGTNGG	none
chr13	60722168	60722190	chr13:60722168-60722190	10	-	0	AAGGAGCCTGTTTATCTGTAGG	6		CRL1684_TRAC_Tcell_19bp.bam	None	None	None_None_chr13:60722168-60722190_10	CAGGGTTCTGGATATCTGTNGG	none
chr13	68343271	68343293	chr13:68343271-68343293	10	-	0	GATGATTCTGGGTATCTGGTGG	5		CRL1684_TRAC_Tcell_19bp.bam	None	None	None_None_chr13:68343271-68343293_10	CAGGGTTCTGGATATCTGTNGG	none
chr13	70986024	70986046	chr13:70986024-70986046	18	-	0	GATGATTTAGGATATCTGGTGG	6		CRL1684_TRAC_Tcell_19bp.bam	None	None	None_None_chr13:70986024-70986046_18	CAGGGTTCTGGATATCTGTNGG	none
chr13	79114066	79114088	chr13:79114066-79114088	6	-	0	GTGGATTCTGGATATTTGTTAG	5		CRL1684_TRAC_Tcell_19bp.bam	None	None	None_None_chr13:79114066-79114088_6	CAGGGTTCTGGATATCTGTNGG	none
chr13	85208011	85208033	chr13:85208011-85208033	6	+	0	GATGATTTAGGATATCTGGTGG	6		CRL1684_TRAC_Tcell_19bp.bam	None	None	None_None_chr13:85208011-85208033_6	CAGGGTTCTGGATATCTGTNGG	none
chr13	89138926	89138948	chr13:89138926-89138948	54	-	0	AACAGTTCTGGATATCTGTCGA	4		CRL1684_TRAC_Tcell_19bp.bam	None	None	None_None_chr13:89138926-89138948_54	CAGGGTTCTGGATATCTGTNGG	none
chr13	91331003	91331025	chr13:91331003-91331025	10	+	0	CTATTCTTTGGATATCTGTTGG	6		CRL1684_TRAC_Tcell_19bp.bam	None	None	None_None_chr13:91331003-91331025_10	CAGGGTTCTGGATATCTGTNGG	none
chr13	96813174	96813196	chr13:96813174-96813196	8	-	0	CAGATTCTAAGATATCTGTGGG	6		CRL1684_TRAC_Tcell_19bp.bam	None	None	None_None_chr13:96813174-96813196_8	CAGGGTTCTGGATATCTGTNGG	none
chr14	105967847	105967869	chr14:105967847-105967869	20	-	0	TAGGGTGAGGGAGAGCTGTGGG	6		CRL1684_TRAC_Tcell_19bp.bam	None	None	None_None_chr14:105967847-105967869_20	CAGGGTTCTGGATATCTGTNGG	none
chr14	21161948	21161970	chr14:21161948-21161970	12	-	0	CCATGGTCTGGCTATCTGTTGG	5	CATGGT-CTGGCTATCTGTTGG	CRL1684_TRAC_Tcell_19bp.bam	None	None	None_None_chr14:21161948-21161970_12	CAGGGTTCTGGATATCTGTNGG	CAGGGTTCTGGATATCTGTNGG
chr14	21406170	21406192	chr14:21406170-21406192	14	-	0	CAGATTTTAGGATATCTGTGGG	4		CRL1684_TRAC_Tcell_19bp.bam	None	None	None_None_chr14:21406170-21406192_14	CAGGGTTCTGGATATCTGTNGG	none
chr14	22547498	22547520	chr14:22547498-22547520	2174	-	0	CAGGGTTCTGGATATCTGTGGG	0		CRL1684_TRAC_Tcell_19bp.bam	None	None	None_None_chr14:22547498-22547520_2174	CAGGGTTCTGGATATCTGTNGG	none
chr14	22816764	22816786	chr14:22816764-22816786	8	+	0	TAGAGATCTAAATATCTCTGGG	6		CRL1684_TRAC_Tcell_19bp.bam	None	None	None_None_chr14:22816764-22816786_8	CAGGGTTCTGGATATCTGTNGG	none
chr14	23832331	23832353	chr14:23832331-23832353	44	-	0	TGGGTTTCTGGATCTCTGTAGG	4		CRL1684_TRAC_Tcell_19bp.bam	None	None	None_None_chr14:23832331-23832353_44	CAGGGTTCTGGATATCTGTNGG	none
chr14	24025395	24025417	chr14:24025395-24025417	30	-	0	CATTGGTCTAGATATCTGTTTG	5		CRL1684_TRAC_Tcell_19bp.bam	None	None	None_None_chr14:24025395-24025417_30	CAGGGTTCTGGATATCTGTNGG	none
chr14	37719545	37719567	chr14:37719545-37719567	14	-	0	ATCAGTTGTGCATATCTGTAGG	6		CRL1684_TRAC_Tcell_19bp.bam	None	None	None_None_chr14:37719545-37719567_14	CAGGGTTCTGGATATCTGTNGG	none
chr14	39420171	39420193	chr14:39420171-39420193	18	+	0	TTAAGTTCTAAATATCTGTGGG	6		CRL1684_TRAC_Tcell_19bp.bam	None	None	None_None_chr14:39420171-39420193_18	CAGGGTTCTGGATATCTGTNGG	none
chr14	43440497	43440519	chr14:43440497-43440519	10	-	0	GTTGGTTCTGTTTATCTGATGG	6		CRL1684_TRAC_Tcell_19bp.bam	None	None	None_None_chr14:43440497-43440519_10	CAGGGTTCTGGATATCTGTNGG	none
chr14	44423248	44423270	chr14:44423248-44423270	6	-	0	GATGATTTAGGATATCTGGTGG	6		CRL1684_TRAC_Tcell_19bp.bam	None	None	None_None_chr14:44423248-44423270_6	CAGGGTTCTGGATATCTGTNGG	none
chr14	47534033	47534055	chr14:47534033-47534055	26	+	0	AATGGGTCTGGATATGTGTAGG	4		CRL1684_TRAC_Tcell_19bp.bam	None	None	None_None_chr14:47534033-47534055_26	CAGGGTTCTGGATATCTGTNGG	none
chr14	49087400	49087422	chr14:49087400-49087422	20	+	0	TGGGGTTCTGGTCATCTACAGG	6		CRL1684_TRAC_Tcell_19bp.bam	None	None	None_None_chr14:49087400-49087422_20	CAGGGTTCTGGATATCTGTNGG	none
chr14	50098324	50098346	chr14:50098324-50098346	8	-	0	TGTGGATTTTGATATCTGTGGG	6		CRL1684_TRAC_Tcell_19bp.bam	None	None	None_None_chr14:50098324-50098346_8	CAGGGTTCTGGATATCTGTNGG	none
chr14	54501515	54501537	chr14:54501515-54501537	14	+	0	TAGCCATGTGGATATCTGGAGG	6		CRL1684_TRAC_Tcell_19bp.bam	None	None	None_None_chr14:54501515-54501537_14	CAGGGTTCTGGATATCTGTNGG	none
chr14	55785016	55785038	chr14:55785016-55785038	8	-	0	CAGAAAAAAGGATATCTGTGGG	6		CRL1684_TRAC_Tcell_19bp.bam	None	None	None_None_chr14:55785016-55785038_8	CAGGGTTCTGGATATCTGTNGG	none
chr14	57140330	57140352	chr14:57140330-57140352	42	-	0	TTCATTCCTGGATATCTGTTGG	6		CRL1684_TRAC_Tcell_19bp.bam	None	None	None_None_chr14:57140330-57140352_42	CAGGGTTCTGGATATCTGTNGG	none
chr14	57898309	57898331	chr14:57898309-57898331	22	+	0	CAGTGTGCTTGAAAGCTGCAGG	6		CRL1684_TRAC_Tcell_19bp.bam	None	None	None_None_chr14:57898309-57898331_22	CAGGGTTCTGGATATCTGTNGG	none
chr14	58216936	58216958	chr14:58216936-58216958	14	+	0	TAGGGCATTGAATATATGTTGG	6		CRL1684_TRAC_Tcell_19bp.bam	None	None	None_None_chr14:58216936-58216958_14	CAGGGTTCTGGATATCTGTNGG	none
chr14	59631159	59631181	chr14:59631159-59631181	64	-	0	AAAGGTTTTGGATATCTGTGGA	4		CRL1684_TRAC_Tcell_19bp.bam	None	None	None_None_chr14:59631159-59631181_64	CAGGGTTCTGGATATCTGTNGG	none
chr14	61065841	61065864	chr14:61065841-61065864	18	+	0			CAGGTTACTGGGTAATCTGTGGG	CRL1684_TRAC_Tcell_19bp.bam	None	None	None_None_chr14:61065841-61065864_18	CAGGGTTCTGGATATCTGTNGG	CAGGGTTCTGGATA-TCTGTNGG
chr14	61950120	61950142	chr14:61950120-61950142	8	-	0	TGGGGATGTGGATATCTGGGGC	6		CRL1684_TRAC_Tcell_19bp.bam	None	None	None_None_chr14:61950120-61950142_8	CAGGGTTCTGGATATCTGTNGG	none
chr14	62953502	62953524	chr14:62953502-62953524	24	-	0	CCTATTTTTGGATACCTGTGGG	6		CRL1684_TRAC_Tcell_19bp.bam	None	None	None_None_chr14:62953502-62953524_24	CAGGGTTCTGGATATCTGTNGG	none
chr14	63295605	63295627	chr14:63295605-63295627	74	+	0	CAGGGTTCTGGGTATCTAGGCA	5	CAGGGTTCTGGGTATCTA-GGC	CRL1684_TRAC_Tcell_19bp.bam	None	None	None_None_chr14:63295605-63295627_74	CAGGGTTCTGGATATCTGTNGG	CAGGGTTCTGGATATCTGTNGG
chr14	64177220	64177242	chr14:64177220-64177242	10	+	0	CAGGGAACTGGGTGTCTGTGTG	5		CRL1684_TRAC_Tcell_19bp.bam	None	None	None_None_chr14:64177220-64177242_10	CAGGGTTCTGGATATCTGTNGG	none
chr14	64836204	64836226	chr14:64836204-64836226	6	+	0	AAATGTCCTGGATGACTGTTGG	6		CRL1684_TRAC_Tcell_19bp.bam	None	None	None_None_chr14:64836204-64836226_6	CAGGGTTCTGGATATCTGTNGG	none
chr14	64890895	64890917	chr14:64890895-64890917	10	+	0	TGGGGATCTGGATCTCTATGTG	6		CRL1684_TRAC_Tcell_19bp.bam	None	None	None_None_chr14:64890895-64890917_10	CAGGGTTCTGGATATCTGTNGG	none
chr14	65614837	65614859	chr14:65614837-65614859	112	+	0	TTAGGTTATGGATATCTTTGGG	5	TAGG-TTATGGATATCTTTGGG	CRL1684_TRAC_Tcell_19bp.bam	None	None	None_None_chr14:65614837-65614859_112	CAGGGTTCTGGATATCTGTNGG	CAGGGTTCTGGATATCTGTNGG
chr14	69810624	69810645	chr14:69810624-69810645	10	-	0			CAGGTTACAGGATAT-TGTGGG	CRL1684_TRAC_Tcell_19bp.bam	None	None	None_None_chr14:69810624-69810645_10	CAGGGTTCTGGATATCTGTNGG	CAGGGTTCTGGATATCTGTNGG
chr14	70497278	70497300	chr14:70497278-70497300	10	+	0	CAGAGATCTGAATTACTCTTGG	6		CRL1684_TRAC_Tcell_19bp.bam	None	None	None_None_chr14:70497278-70497300_10	CAGGGTTCTGGATATCTGTNGG	none
chr14	71713488	71713510	chr14:71713488-71713510	34	+	0	TCAGGATCTAGATATATGTTGG	6	CAGGAT-CTAGATATATGTTGG	CRL1684_TRAC_Tcell_19bp.bam	None	None	None_None_chr14:71713488-71713510_34	CAGGGTTCTGGATATCTGTNGG	CAGGGTTCTGGATATCTGTNGG
chr14	80637226	80637248	chr14:80637226-80637248	12	-	0	CAGGGATATGGGTATCTTTGGG	4		CRL1684_TRAC_Tcell_19bp.bam	None	None	None_None_chr14:80637226-80637248_12	CAGGGTTCTGGATATCTGTNGG	none
chr14	81566751	81566773	chr14:81566751-81566773	16	+	0	CTGGCTTGCAGCTATCTGTAGG	6		CRL1684_TRAC_Tcell_19bp.bam	None	None	None_None_chr14:81566751-81566773_16	CAGGGTTCTGGATATCTGTNGG	none
chr14	81978174	81978196	chr14:81978174-81978196	8	-	0	CAGGTTTCTGGATACTTTGGGG	5	CAGGTTTCTGGATA-CTTTGGG	CRL1684_TRAC_Tcell_19bp.bam	None	None	None_None_chr14:81978174-81978196_8	CAGGGTTCTGGATATCTGTNGG	CAGGGTTCTGGATATCTGTNGG
chr14	87317095	87317117	chr14:87317095-87317117	6	-	0	AGGGATCCTGGATAACTGTGAG	6		CRL1684_TRAC_Tcell_19bp.bam	None	None	None_None_chr14:87317095-87317117_6	CAGGGTTCTGGATATCTGTNGG	none
chr14	89013762	89013784	chr14:89013762-89013784	6	+	0	CAGGGTTCTGGAAATATTTGGG	3		CRL1684_TRAC_Tcell_19bp.bam	None	None	None_None_chr14:89013762-89013784_6	CAGGGTTCTGGATATCTGTNGG	none
chr14	90606054	90606075	chr14:90606054-90606075	10	-	0			GAATGTTCTGGATAT-TGTAGG	CRL1684_TRAC_Tcell_19bp.bam	None	None	None_None_chr14:90606054-90606075_10	CAGGGTTCTGGATATCTGTNGG	CAGGGTTCTGGATATCTGTNGG
chr14	92286693	92286715	chr14:92286693-92286715	16	+	0	GAGCGTTTTGGAAATCTGTGGG	4		CRL1684_TRAC_Tcell_19bp.bam	None	None	None_None_chr14:92286693-92286715_16	CAGGGTTCTGGATATCTGTNGG	none
chr14	95708335	95708357	chr14:95708335-95708357	6	+	0	CATGGTAGTGGATGCCTGTAGT	6		CRL1684_TRAC_Tcell_19bp.bam	None	None	None_None_chr14:95708335-95708357_6	CAGGGTTCTGGATATCTGTNGG	none
chr14	98316457	98316479	chr14:98316457-98316479	14	+	0	CTGTCCTCTGGATATCTGTAGG	4		CRL1684_TRAC_Tcell_19bp.bam	None	None	None_None_chr14:98316457-98316479_14	CAGGGTTCTGGATATCTGTNGG	none
chr14	98534254	98534276	chr14:98534254-98534276	38	+	0	TTAGAATGTGGATATCTGTGGG	6		CRL1684_TRAC_Tcell_19bp.bam	None	None	None_None_chr14:98534254-98534276_38	CAGGGTTCTGGATATCTGTNGG	none
chr14	99134686	99134708	chr14:99134686-99134708	52	-	0	ACTGGGTCCGGATATCTGTGGA	6	CTGGGTCC-GGATATCTGTGGA	CRL1684_TRAC_Tcell_19bp.bam	None	None	None_None_chr14:99134686-99134708_52	CAGGGTTCTGGATATCTGTNGG	CAGGGTTCTGGATATCTGTNGG
chr15	100198694	100198716	chr15:100198694-100198716	14	-	0	CCAGGTTGTGACCATCTGTAGG	6		CRL1684_TRAC_Tcell_19bp.bam	None	None	None_None_chr15:100198694-100198716_14	CAGGGTTCTGGATATCTGTNGG	none
chr15	101719439	101719461	chr15:101719439-101719461	70	+	0	CAGATATCTGGATGTCAGAGGG	6		CRL1684_TRAC_Tcell_19bp.bam	None	None	None_None_chr15:101719439-101719461_70	CAGGGTTCTGGATATCTGTNGG	none
chr15	23000720	23000742	chr15:23000720-23000742	6	+	0	TAGGCTTCAAGATATCTGTGGA	5		CRL1684_TRAC_Tcell_19bp.bam	None	None	None_None_chr15:23000720-23000742_6	CAGGGTTCTGGATATCTGTNGG	none
chr15	27745788	27745810	chr15:27745788-27745810	48	-	0	CAGGGTTCTGATTATGTGGGTG	5		CRL1684_TRAC_Tcell_19bp.bam	None	None	None_None_chr15:27745788-27745810_48	CAGGGTTCTGGATATCTGTNGG	none
chr15	29771137	29771158	chr15:29771137-29771158	20	-	0			TACTGTTCTGGATA-CTGTAGG	CRL1684_TRAC_Tcell_19bp.bam	None	None	None_None_chr15:29771137-29771158_20	CAGGGTTCTGGATATCTGTNGG	CAGGGTTCTGGATATCTGTNGG
chr15	33748829	33748851	chr15:33748829-33748851	12	-	0	CGTGGGTTTTGGTATCTGTGGG	6	GTGGGTTTTGG-TATCTGTGGG	CRL1684_TRAC_Tcell_19bp.bam	None	None	None_None_chr15:33748829-33748851_12	CAGGGTTCTGGATATCTGTNGG	CAGGGTTCTGGATATCTGTNGG
chr15	35120398	35120420	chr15:35120398-35120420	30	-	0	TCCAGTCCTGGATATCTGTAGC	6		CRL1684_TRAC_Tcell_19bp.bam	None	None	None_None_chr15:35120398-35120420_30	CAGGGTTCTGGATATCTGTNGG	none
chr15	35214517	35214539	chr15:35214517-35214539	10	-	0	TTGGATTCTGGATATATGTTGA	5		CRL1684_TRAC_Tcell_19bp.bam	None	None	None_None_chr15:35214517-35214539_10	CAGGGTTCTGGATATCTGTNGG	none
chr15	37396200	37396222	chr15:37396200-37396222	30	+	0	AAGGGTTTTGCATATATGTTGG	4		CRL1684_TRAC_Tcell_19bp.bam	None	None	None_None_chr15:37396200-37396222_30	CAGGGTTCTGGATATCTGTNGG	none
chr15	38738581	38738603	chr15:38738581-38738603	26	+	0	CAGGATGAAGAATATCTGTAGC	6		CRL1684_TRAC_Tcell_19bp.bam	None	None	None_None_chr15:38738581-38738603_26	CAGGGTTCTGGATATCTGTNGG	none
chr15	40087330	40087352	chr15:40087330-40087352	14	-	0	CAGAGTTCTGAAAATCCTTGGG	5		CRL1684_TRAC_Tcell_19bp.bam	None	None	None_None_chr15:40087330-40087352_14	CAGGGTTCTGGATATCTGTNGG	none
chr15	40259070	40259091	chr15:40259070-40259091	18	+	0			CAGGGT-CTGGCTCTCTGAGGG	CRL1684_TRAC_Tcell_19bp.bam	None	None	None_None_chr15:40259070-40259091_18	CAGGGTTCTGGATATCTGTNGG	CAGGGTTCTGGATATCTGTNGG
chr15	42571669	42571691	chr15:42571669-42571691	12	-	0	TTGCATTCAAGATATCTGTAGG	6		CRL1684_TRAC_Tcell_19bp.bam	None	None	None_None_chr15:42571669-42571691_12	CAGGGTTCTGGATATCTGTNGG	none
chr15	43038113	43038135	chr15:43038113-43038135	28	-	0	TCTGTTTCTGAATATCTCTTGG	6		CRL1684_TRAC_Tcell_19bp.bam	None	None	None_None_chr15:43038113-43038135_28	CAGGGTTCTGGATATCTGTNGG	none
chr15	43800368	43800390	chr15:43800368-43800390	6	+	0	GGTGGTTAAGGATATCGGTGGG	6		CRL1684_TRAC_Tcell_19bp.bam	None	None	None_None_chr15:43800368-43800390_6	CAGGGTTCTGGATATCTGTNGG	none
chr15	44115776	44115798	chr15:44115776-44115798	20	+	0	CTGAGTTCTAAACATTTGTAGG	6		CRL1684_TRAC_Tcell_19bp.bam	None	None	None_None_chr15:44115776-44115798_20	CAGGGTTCTGGATATCTGTNGG	none
chr15	45536929	45536951	chr15:45536929-45536951	72	-	0	GAGGGGGTTGGTTATCTGTGGG	5		CRL1684_TRAC_Tcell_19bp.bam	None	None	None_None_chr15:45536929-45536951_72	CAGGGTTCTGGATATCTGTNGG	none
chr15	51326350	51326372	chr15:51326350-51326372	10	-	0	TGGAGTTCTGGACATCTGAGGC	6		CRL1684_TRAC_Tcell_19bp.bam	None	None	None_None_chr15:51326350-51326372_10	CAGGGTTCTGGATATCTGTNGG	none
chr15	53088142	53088164	chr15:53088142-53088164	10	+	0	GGGTGTTTTGTATTTCTGTGGG	6		CRL1684_TRAC_Tcell_19bp.bam	None	None	None_None_chr15:53088142-53088164_10	CAGGGTTCTGGATATCTGTNGG	none
chr15	55089774	55089796	chr15:55089774-55089796	24	+	0	CAGGGTCTAGTTTAGCTGTAGG	6		CRL1684_TRAC_Tcell_19bp.bam	None	None	None_None_chr15:55089774-55089796_24	CAGGGTTCTGGATATCTGTNGG	none
chr15	56990619	56990641	chr15:56990619-56990641	12	+	0	CACTACTCTACATATCTGTTGG	6		CRL1684_TRAC_Tcell_19bp.bam	None	None	None_None_chr15:56990619-56990641_12	CAGGGTTCTGGATATCTGTNGG	none
chr15	58735451	58735473	chr15:58735451-58735473	68	-	0	AATGGATTTGGATATCTGTGGG	4		CRL1684_TRAC_Tcell_19bp.bam	None	None	None_None_chr15:58735451-58735473_68	CAGGGTTCTGGATATCTGTNGG	none
chr15	60878839	60878861	chr15:60878839-60878861	26	-	0	ACCAATTCTGGATACCTGTAGG	6		CRL1684_TRAC_Tcell_19bp.bam	None	None	None_None_chr15:60878839-60878861_26	CAGGGTTCTGGATATCTGTNGG	none
chr15	63063195	63063217	chr15:63063195-63063217	34	-	0	CAACATTTAGGATATCTGTGAG	6		CRL1684_TRAC_Tcell_19bp.bam	None	None	None_None_chr15:63063195-63063217_34	CAGGGTTCTGGATATCTGTNGG	none
chr15	65174708	65174730	chr15:65174708-65174730	12	-	0	CATGGATTTGGTTATATGTGGG	5		CRL1684_TRAC_Tcell_19bp.bam	None	None	None_None_chr15:65174708-65174730_12	CAGGGTTCTGGATATCTGTNGG	none
chr15	65339819	65339841	chr15:65339819-65339841	66	+	0	CACTCCTGCGGATATCTGTTGG	6		CRL1684_TRAC_Tcell_19bp.bam	None	None	None_None_chr15:65339819-65339841_66	CAGGGTTCTGGATATCTGTNGG	none
chr15	68493623	68493645	chr15:68493623-68493645	6	+	0	AAAGGGGCTGAATATCTGTGGG	5	AAGGGG-CTGAATATCTGTGGG	CRL1684_TRAC_Tcell_19bp.bam	None	None	None_None_chr15:68493623-68493645_6	CAGGGTTCTGGATATCTGTNGG	CAGGGTTCTGGATATCTGTNGG
chr15	71756436	71756458	chr15:71756436-71756458	6	+	0	CTGGATTCAAGGTATCTGTAGG	5		CRL1684_TRAC_Tcell_19bp.bam	None	None	None_None_chr15:71756436-71756458_6	CAGGGTTCTGGATATCTGTNGG	none
chr15	73906552	73906573	chr15:73906552-73906573	12	+	0			CAGAGCTCAG-ATATCTGTGGG	CRL1684_TRAC_Tcell_19bp.bam	None	None	None_None_chr15:73906552-73906573_12	CAGGGTTCTGGATATCTGTNGG	CAGGGTTCTGGATATCTGTNGG
chr15	74401915	74401937	chr15:74401915-74401937	24	+	0	CAGAGTCCCAGATATCAGTGGG	5		CRL1684_TRAC_Tcell_19bp.bam	None	None	None_None_chr15:74401915-74401937_24	CAGGGTTCTGGATATCTGTNGG	none
chr15	76938404	76938426	chr15:76938404-76938426	20	+	0	CTTGGGTTTTGGTATCTGTGGG	6	TTGGGTTTTGG-TATCTGTGGG	CRL1684_TRAC_Tcell_19bp.bam	None	None	None_None_chr15:76938404-76938426_20	CAGGGTTCTGGATATCTGTNGG	CAGGGTTCTGGATATCTGTNGG
chr15	77893817	77893839	chr15:77893817-77893839	6	-	0	CAGGGGTGAGGGAATCTGAGGG	6		CRL1684_TRAC_Tcell_19bp.bam	None	None	None_None_chr15:77893817-77893839_6	CAGGGTTCTGGATATCTGTNGG	none
chr15	78392178	78392200	chr15:78392178-78392200	6	-	0	AAGGCTCAGGGATATCTATGGG	6		CRL1684_TRAC_Tcell_19bp.bam	None	None	None_None_chr15:78392178-78392200_6	CAGGGTTCTGGATATCTGTNGG	none
chr15	80164488	80164510	chr15:80164488-80164510	18	+	0	TTAGGATCTGGATATCTTTTGG	5	TAGGAT-CTGGATATCTTTTGG	CRL1684_TRAC_Tcell_19bp.bam	None	None	None_None_chr15:80164488-80164510_18	CAGGGTTCTGGATATCTGTNGG	CAGGGTTCTGGATATCTGTNGG
chr15	80715330	80715352	chr15:80715330-80715352	6	+	0	CAGAAACCTGGATAACTGTAGG	5		CRL1684_TRAC_Tcell_19bp.bam	None	None	None_None_chr15:80715330-80715352_6	CAGGGTTCTGGATATCTGTNGG	none
chr15	81401297	81401319	chr15:81401297-81401319	26	+	0	TTAGGATCTGGATATCTTTGGA	6		CRL1684_TRAC_Tcell_19bp.bam	None	None	None_None_chr15:81401297-81401319_26	CAGGGTTCTGGATATCTGTNGG	none
chr15	83088931	83088953	chr15:83088931-83088953	12	+	0	CAAACATCTAGAAATCTGTTGG	6		CRL1684_TRAC_Tcell_19bp.bam	None	None	None_None_chr15:83088931-83088953_12	CAGGGTTCTGGATATCTGTNGG	none
chr15	83757809	83757831	chr15:83757809-83757831	6	-	0	GATGATTCAGGGTATCTGGTGG	6		CRL1684_TRAC_Tcell_19bp.bam	None	None	None_None_chr15:83757809-83757831_6	CAGGGTTCTGGATATCTGTNGG	none
chr15	85000913	85000935	chr15:85000913-85000935	6	-	0	GTAGGTTCTGGTTATCTGGGAG	6		CRL1684_TRAC_Tcell_19bp.bam	None	None	None_None_chr15:85000913-85000935_6	CAGGGTTCTGGATATCTGTNGG	none
chr15	88895045	88895067	chr15:88895045-88895067	44	-	0	CCTGCCCCTGGGTATCTGTTGG	6		CRL1684_TRAC_Tcell_19bp.bam	None	None	None_None_chr15:88895045-88895067_44	CAGGGTTCTGGATATCTGTNGG	none
chr15	93951745	93951767	chr15:93951745-93951767	8	-	0	TATGGATATAGATATATGTAGG	6		CRL1684_TRAC_Tcell_19bp.bam	None	None	None_None_chr15:93951745-93951767_8	CAGGGTTCTGGATATCTGTNGG	none
chr15	95274667	95274689	chr15:95274667-95274689	82	-	0	GTGCTTTATGGATATCTGTAAG	6		CRL1684_TRAC_Tcell_19bp.bam	None	None	None_None_chr15:95274667-95274689_82	CAGGGTTCTGGATATCTGTNGG	none
chr15	95435666	95435688	chr15:95435666-95435688	26	-	0	GCAAGGTCAGGATATCTGTAGG	6	CAAGGT-CAGGATATCTGTAGG	CRL1684_TRAC_Tcell_19bp.bam	None	None	None_None_chr15:95435666-95435688_26	CAGGGTTCTGGATATCTGTNGG	CAGGGTTCTGGATATCTGTNGG
chr15	95637791	95637813	chr15:95637791-95637813	20	-	0	TTTCTTTCTGGATATTTGTAGG	6		CRL1684_TRAC_Tcell_19bp.bam	None	None	None_None_chr15:95637791-95637813_20	CAGGGTTCTGGATATCTGTNGG	none
chr15	98573493	98573515	chr15:98573493-98573515	8	+	0	TGGGGGACTGGATATCTGTATG	5		CRL1684_TRAC_Tcell_19bp.bam	None	None	None_None_chr15:98573493-98573515_8	CAGGGTTCTGGATATCTGTNGG	none
chr15	99175571	99175593	chr15:99175571-99175593	42	-	0	GAGGGGTCTGTATATCTGTGGG	3		CRL1684_TRAC_Tcell_19bp.bam	None	None	None_None_chr15:99175571-99175593_42	CAGGGTTCTGGATATCTGTNGG	none
chr16	10383601	10383623	chr16:10383601-10383623	10	+	0	CTGGGCTCAAGCTATCTGTCGG	5		CRL1684_TRAC_Tcell_19bp.bam	None	None	None_None_chr16:10383601-10383623_10	CAGGGTTCTGGATATCTGTNGG	none
chr16	1204017	1204039	chr16:1204017-1204039	6	+	0	CAGGCCCCTGGCCATCTGTCGG	5		CRL1684_TRAC_Tcell_19bp.bam	None	None	None_None_chr16:1204017-1204039_6	CAGGGTTCTGGATATCTGTNGG	none
chr16	14069779	14069801	chr16:14069779-14069801	8	-	0	CTAGGTTCTAGATAGATGTAGG	5		CRL1684_TRAC_Tcell_19bp.bam	None	None	None_None_chr16:14069779-14069801_8	CAGGGTTCTGGATATCTGTNGG	none
chr16	1571465	1571487	chr16:1571465-1571487	6	-	0	CTGCTTCTTGGACATCTGTGGG	6		CRL1684_TRAC_Tcell_19bp.bam	None	None	None_None_chr16:1571465-1571487_6	CAGGGTTCTGGATATCTGTNGG	none
chr16	19151779	19151801	chr16:19151779-19151801	58	-	0	CATTGTTCTAGATATCTGTGGG	3		CRL1684_TRAC_Tcell_19bp.bam	None	None	None_None_chr16:19151779-19151801_58	CAGGGTTCTGGATATCTGTNGG	none
chr16	22635491	22635513	chr16:22635491-22635513	38	-	0	ATGGAATCAGAATATCTGTGGG	6		CRL1684_TRAC_Tcell_19bp.bam	None	None	None_None_chr16:22635491-22635513_38	CAGGGTTCTGGATATCTGTNGG	none
chr16	2283343	2283365	chr16:2283343-2283365	10	+	0	CCTGGTACTGGATGTCTGTGGG	4		CRL1684_TRAC_Tcell_19bp.bam	None	None	None_None_chr16:2283343-2283365_10	CAGGGTTCTGGATATCTGTNGG	none
chr16	27876000	27876022	chr16:27876000-27876022	12	-	0	GATCATGCTGGAAATCTGTTGG	6		CRL1684_TRAC_Tcell_19bp.bam	None	None	None_None_chr16:27876000-27876022_12	CAGGGTTCTGGATATCTGTNGG	none
chr16	30506705	30506727	chr16:30506705-30506727	260	-	0	CAGGGCTCTGGATCTGTGGGGG	4		CRL1684_TRAC_Tcell_19bp.bam	None	None	None_None_chr16:30506705-30506727_260	CAGGGTTCTGGATATCTGTNGG	none
chr16	4419080	4419102	chr16:4419080-4419102	10	-	0	CTGAGCTGTGGATATCTGTGAG	5		CRL1684_TRAC_Tcell_19bp.bam	None	None	None_None_chr16:4419080-4419102_10	CAGGGTTCTGGATATCTGTNGG	none
chr16	57614155	57614177	chr16:57614155-57614177	8	+	0	CAGGTTCCTAAATCTCTTTAGG	6		CRL1684_TRAC_Tcell_19bp.bam	None	None	None_None_chr16:57614155-57614177_8	CAGGGTTCTGGATATCTGTNGG	none
chr16	69112549	69112572	chr16:69112549-69112572	10	+	0			CAGGGTTTTGGTTTATCTGTGGA	CRL1684_TRAC_Tcell_19bp.bam	None	None	None_None_chr16:69112549-69112572_10	CAGGGTTCTGGATATCTGTNGG	CAGGGTTCTGGAT-ATCTGTNGG
chr16	71739285	71739307	chr16:71739285-71739307	76	+	0	GGGGGGCTGGGATATCTGTGGG	6		CRL1684_TRAC_Tcell_19bp.bam	None	None	None_None_chr16:71739285-71739307_76	CAGGGTTCTGGATATCTGTNGG	none
chr16	79366276	79366298	chr16:79366276-79366298	10	+	0	CATGGTACCAAATATCTGTTGG	5		CRL1684_TRAC_Tcell_19bp.bam	None	None	None_None_chr16:79366276-79366298_10	CAGGGTTCTGGATATCTGTNGG	none
chr16	83785562	83785584	chr16:83785562-83785584	70	-	0	CTAGGTCTAGGATATCTGTCAG	6		CRL1684_TRAC_Tcell_19bp.bam	None	None	None_None_chr16:83785562-83785584_70	CAGGGTTCTGGATATCTGTNGG	none
chr16	85804032	85804054	chr16:85804032-85804054	44	-	0	CAGGGTTCTAGAGATCTGGGAT	5	CAGGGTTCTAGAGATCTG-GGA	CRL1684_TRAC_Tcell_19bp.bam	None	None	None_None_chr16:85804032-85804054_44	CAGGGTTCTGGATATCTGTNGG	CAGGGTTCTGGATATCTGTNGG
chr16	86022473	86022495	chr16:86022473-86022495	30	+	0	TGGGGCTCTGAGTACCTGTGGG	6		CRL1684_TRAC_Tcell_19bp.bam	None	None	None_None_chr16:86022473-86022495_30	CAGGGTTCTGGATATCTGTNGG	none
chr16	86394784	86394806	chr16:86394784-86394806	26	+	0	CATGTTAGAGAATATCTGTGGG	6		CRL1684_TRAC_Tcell_19bp.bam	None	None	None_None_chr16:86394784-86394806_26	CAGGGTTCTGGATATCTGTNGG	none
chr16	86780992	86781014	chr16:86780992-86781014	8	+	0	AGGTGTTCTGGTTATCTCTTGG	5	TAGGTGTTCTGGTTATCTCTTGG	CRL1684_TRAC_Tcell_19bp.bam	None	None	None_None_chr16:86780992-86781014_8	CAGGGTTCTGGATATCTGTNGG	CAGG-GTTCTGGATATCTGTNGG
chr16	8766998	8767020	chr16:8766998-8767020	28	+	0	GAGGGTTTCTGGAATCTGTGGG	6	AGGGTTTCTGGA-ATCTGTGGG	CRL1684_TRAC_Tcell_19bp.bam	None	None	None_None_chr16:8766998-8767020_28	CAGGGTTCTGGATATCTGTNGG	CAGGGTTCTGGATATCTGTNGG
chr16	89484876	89484898	chr16:89484876-89484898	10	-	0	TATTATCCTGGAAATCTGTAGG	6		CRL1684_TRAC_Tcell_19bp.bam	None	None	None_None_chr16:89484876-89484898_10	CAGGGTTCTGGATATCTGTNGG	none
chr16	89637280	89637302	chr16:89637280-89637302	6	-	0	CGGGGCTCTGGACAGCTGCAGG	5		CRL1684_TRAC_Tcell_19bp.bam	None	None	None_None_chr16:89637280-89637302_6	CAGGGTTCTGGATATCTGTNGG	none
chr17	10093018	10093040	chr17:10093018-10093040	24	+	0	TAAGGACCTGAATATCTGTAGG	5		CRL1684_TRAC_Tcell_19bp.bam	None	None	None_None_chr17:10093018-10093040_24	CAGGGTTCTGGATATCTGTNGG	none
chr17	12425243	12425265	chr17:12425243-12425265	30	+	0	GATGGTTCCGGATATCTGTTAG	4		CRL1684_TRAC_Tcell_19bp.bam	None	None	None_None_chr17:12425243-12425265_30	CAGGGTTCTGGATATCTGTNGG	none
chr17	17098946	17098968	chr17:17098946-17098968	6	-	0	CTGCTTTTGGAATATCTGTAGG	6		CRL1684_TRAC_Tcell_19bp.bam	None	None	None_None_chr17:17098946-17098968_6	CAGGGTTCTGGATATCTGTNGG	none
chr17	18024919	18024941	chr17:18024919-18024941	10	-	0	CAGAGGTTCTGATTTCTGTAGG	6		CRL1684_TRAC_Tcell_19bp.bam	None	None	None_None_chr17:18024919-18024941_10	CAGGGTTCTGGATATCTGTNGG	none
chr17	19838074	19838096	chr17:19838074-19838096	114	-	0	GAGCCATGTGGATATCTGTGGG	5		CRL1684_TRAC_Tcell_19bp.bam	None	None	None_None_chr17:19838074-19838096_114	CAGGGTTCTGGATATCTGTNGG	none
chr17	21351595	21351617	chr17:21351595-21351617	40	+	0	CAGGGACCTGGTTATCTGTGAG	4		CRL1684_TRAC_Tcell_19bp.bam	None	None	None_None_chr17:21351595-21351617_40	CAGGGTTCTGGATATCTGTNGG	none
chr17	21462209	21462231	chr17:21462209-21462231	32	-	0	AGTGGCTCCTGATATCTGTTGG	6		CRL1684_TRAC_Tcell_19bp.bam	None	None	None_None_chr17:21462209-21462231_32	CAGGGTTCTGGATATCTGTNGG	none
chr17	21736347	21736369	chr17:21736347-21736369	16	-	0	CAGGGACCTGGTTATCTGTGAG	4		CRL1684_TRAC_Tcell_19bp.bam	None	None	None_None_chr17:21736347-21736369_16	CAGGGTTCTGGATATCTGTNGG	none
chr17	27432705	27432726	chr17:27432705-27432726	6	+	0			CAGGACTTTGG-TATCTGTGGG	CRL1684_TRAC_Tcell_19bp.bam	None	None	None_None_chr17:27432705-27432726_6	CAGGGTTCTGGATATCTGTNGG	CAGGGTTCTGGATATCTGTNGG
chr17	27762824	27762846	chr17:27762824-27762846	6	+	0	CAGTCAGGTGGATCTCTGTGGG	6		CRL1684_TRAC_Tcell_19bp.bam	None	None	None_None_chr17:27762824-27762846_6	CAGGGTTCTGGATATCTGTNGG	none
chr17	29229020	29229042	chr17:29229020-29229042	28	+	0	TTGGGTTCAGGGAATCTGTTGG	5		CRL1684_TRAC_Tcell_19bp.bam	None	None	None_None_chr17:29229020-29229042_28	CAGGGTTCTGGATATCTGTNGG	none
chr17	31789995	31790017	chr17:31789995-31790017	8	-	0	GAGGGGGCAGGATTTCTGTAGG	5		CRL1684_TRAC_Tcell_19bp.bam	None	None	None_None_chr17:31789995-31790017_8	CAGGGTTCTGGATATCTGTNGG	none
chr17	3648296	3648318	chr17:3648296-3648318	16	-	0	CAGGGGCCTGGACAGTTGTGGT	6		CRL1684_TRAC_Tcell_19bp.bam	None	None	None_None_chr17:3648296-3648318_16	CAGGGTTCTGGATATCTGTNGG	none
chr17	36828366	36828388	chr17:36828366-36828388	14	+	0	TAGTGCACAGGATATATGTAGG	6		CRL1684_TRAC_Tcell_19bp.bam	None	None	None_None_chr17:36828366-36828388_14	CAGGGTTCTGGATATCTGTNGG	none
chr17	38770022	38770044	chr17:38770022-38770044	6	+	0	CGCGGCTCTGGATCTCTGTGGG	4		CRL1684_TRAC_Tcell_19bp.bam	None	None	None_None_chr17:38770022-38770044_6	CAGGGTTCTGGATATCTGTNGG	none
chr17	39038680	39038702	chr17:39038680-39038702	22	+	0	CAGGATAGTGGATATCTATAAG	5		CRL1684_TRAC_Tcell_19bp.bam	None	None	None_None_chr17:39038680-39038702_22	CAGGGTTCTGGATATCTGTNGG	none
chr17	40539099	40539121	chr17:40539099-40539121	8	-	0	AAGGGCTCCCAATATGTGTTGG	6		CRL1684_TRAC_Tcell_19bp.bam	None	None	None_None_chr17:40539099-40539121_8	CAGGGTTCTGGATATCTGTNGG	none
chr17	40703372	40703394	chr17:40703372-40703394	852	-	0			CAGGGGTTCTGGAT-TCTGTGGG	CRL1684_TRAC_Tcell_19bp.bam	None	None	None_None_chr17:40703372-40703394_852	CAGGGTTCTGGATATCTGTNGG	CAGGG-TTCTGGATATCTGTNGG
chr17	410868	410890	chr17:410868-410890	14	-	0	AGGAATGGTGGATATCTGTAGG	6		CRL1684_TRAC_Tcell_19bp.bam	None	None	None_None_chr17:410868-410890_14	CAGGGTTCTGGATATCTGTNGG	none
chr17	42228118	42228140	chr17:42228118-42228140	16	+	0	CAAGGAGTTTGGTATCTGTGGG	6		CRL1684_TRAC_Tcell_19bp.bam	None	None	None_None_chr17:42228118-42228140_16	CAGGGTTCTGGATATCTGTNGG	none
chr17	43338881	43338903	chr17:43338881-43338903	7	+	0	CAGGCCTCTGGATAACTGCAGG	4		CRL1684_TRAC_Tcell_19bp.bam	None	None	None_None_chr17:43338881-43338903_7	CAGGGTTCTGGATATCTGTNGG	none
chr17	45045058	45045080	chr17:45045058-45045080	64	+	0	TAGGTATCTAGATATCTATAGG	5		CRL1684_TRAC_Tcell_19bp.bam	None	None	None_None_chr17:45045058-45045080_64	CAGGGTTCTGGATATCTGTNGG	none
chr17	45045090	45045112	chr17:45045090-45045112	148	+	0	TAGGTATCTAGATATCTATAGG	5		CRL1684_TRAC_Tcell_19bp.bam	None	None	None_None_chr17:45045090-45045112_148	CAGGGTTCTGGATATCTGTNGG	none
chr17	45696232	45696254	chr17:45696232-45696254	18	+	0	CCCTGGTCTAGATATCTTTTGG	6		CRL1684_TRAC_Tcell_19bp.bam	None	None	None_None_chr17:45696232-45696254_18	CAGGGTTCTGGATATCTGTNGG	none
chr17	45752994	45753016	chr17:45752994-45753016	12	-	0	CCCAGTTCTGGTTATCTGTGGA	5		CRL1684_TRAC_Tcell_19bp.bam	None	None	None_None_chr17:45752994-45753016_12	CAGGGTTCTGGATATCTGTNGG	none
chr17	49162550	49162572	chr17:49162550-49162572	52	-	0	CACAGATATAAATATCTGTAGG	6		CRL1684_TRAC_Tcell_19bp.bam	None	None	None_None_chr17:49162550-49162572_52	CAGGGTTCTGGATATCTGTNGG	none
chr17	49184638	49184660	chr17:49184638-49184660	22	+	0	GATGATTTAGGATATCTGGTGG	6		CRL1684_TRAC_Tcell_19bp.bam	None	None	None_None_chr17:49184638-49184660_22	CAGGGTTCTGGATATCTGTNGG	none
chr17	51236177	51236199	chr17:51236177-51236199	24	-	0	TGGGGATATAGATATCTATAGG	6		CRL1684_TRAC_Tcell_19bp.bam	None	None	None_None_chr17:51236177-51236199_24	CAGGGTTCTGGATATCTGTNGG	none
chr17	5842733	5842755	chr17:5842733-5842755	8	-	0	TATTGTTCCTGATATCTGGAGG	6		CRL1684_TRAC_Tcell_19bp.bam	None	None	None_None_chr17:5842733-5842755_8	CAGGGTTCTGGATATCTGTNGG	none
chr17	61851561	61851583	chr17:61851561-61851583	8	+	0	CAAGTTTCTGGATACATGTGGG	4		CRL1684_TRAC_Tcell_19bp.bam	None	None	None_None_chr17:61851561-61851583_8	CAGGGTTCTGGATATCTGTNGG	none
chr17	64115348	64115370	chr17:64115348-64115370	16	-	0	CTTCTTTCTGCATATATGTAGG	6		CRL1684_TRAC_Tcell_19bp.bam	None	None	None_None_chr17:64115348-64115370_16	CAGGGTTCTGGATATCTGTNGG	none
chr17	64203649	64203671	chr17:64203649-64203671	26	-	0	ATGAATTCTGGATGTCTGTGGG	5		CRL1684_TRAC_Tcell_19bp.bam	None	None	None_None_chr17:64203649-64203671_26	CAGGGTTCTGGATATCTGTNGG	none
chr17	6724298	6724320	chr17:6724298-6724320	20	-	0	CAGCGGTGTGGATATCTGTGAG	4		CRL1684_TRAC_Tcell_19bp.bam	None	None	None_None_chr17:6724298-6724320_20	CAGGGTTCTGGATATCTGTNGG	none
chr17	7188142	7188164	chr17:7188142-7188164	6	-	0	CAGGGGTCTGCATTTCTGGAAA	6		CRL1684_TRAC_Tcell_19bp.bam	None	None	None_None_chr17:7188142-7188164_6	CAGGGTTCTGGATATCTGTNGG	none
chr17	72151970	72151992	chr17:72151970-72151992	20	-	0	AAAGTATCTGGATATCCATGGG	6		CRL1684_TRAC_Tcell_19bp.bam	None	None	None_None_chr17:72151970-72151992_20	CAGGGTTCTGGATATCTGTNGG	none
chr17	72408365	72408387	chr17:72408365-72408387	22	-	0	TCAGGGTGTGGATATCTTTGGG	6	CAGGGTG-TGGATATCTTTGGG	CRL1684_TRAC_Tcell_19bp.bam	None	None	None_None_chr17:72408365-72408387_22	CAGGGTTCTGGATATCTGTNGG	CAGGGTTCTGGATATCTGTNGG
chr17	72950362	72950384	chr17:72950362-72950384	100	-	0	CAGGATTCTGGCCATCTGTAGG	3		CRL1684_TRAC_Tcell_19bp.bam	None	None	None_None_chr17:72950362-72950384_100	CAGGGTTCTGGATATCTGTNGG	none
chr17	7414336	7414358	chr17:7414336-7414358	10	-	0	CAGGGTCACGGATATCTGTGTG	4		CRL1684_TRAC_Tcell_19bp.bam	None	None	None_None_chr17:7414336-7414358_10	CAGGGTTCTGGATATCTGTNGG	none
chr17	74394567	74394588	chr17:74394567-74394588	30	-	0			CAGGGT-CTGGGCATCTGCGGG	CRL1684_TRAC_Tcell_19bp.bam	None	None	None_None_chr17:74394567-74394588_30	CAGGGTTCTGGATATCTGTNGG	CAGGGTTCTGGATATCTGTNGG
chr17	74613466	74613488	chr17:74613466-74613488	6	+	0	GCCCTTTCTGGATATCTTTGGG	6		CRL1684_TRAC_Tcell_19bp.bam	None	None	None_None_chr17:74613466-74613488_6	CAGGGTTCTGGATATCTGTNGG	none
chr17	76302414	76302436	chr17:76302414-76302436	28	-	0	TGGGGACATGGATATCTTTGGG	6		CRL1684_TRAC_Tcell_19bp.bam	None	None	None_None_chr17:76302414-76302436_28	CAGGGTTCTGGATATCTGTNGG	none
chr17	77031991	77032013	chr17:77031991-77032013	14	-	0	TTAGGAGCTGGATATCTTTGGG	6		CRL1684_TRAC_Tcell_19bp.bam	None	None	None_None_chr17:77031991-77032013_14	CAGGGTTCTGGATATCTGTNGG	none
chr17	77351319	77351341	chr17:77351319-77351341	8	+	0	CCGGGTTCTGGGAAACTGTAGG	4		CRL1684_TRAC_Tcell_19bp.bam	None	None	None_None_chr17:77351319-77351341_8	CAGGGTTCTGGATATCTGTNGG	none
chr17	78945089	78945111	chr17:78945089-78945111	22	-	0	CATGGCTCTGGATATCTGTGGA	3		CRL1684_TRAC_Tcell_19bp.bam	None	None	None_None_chr17:78945089-78945111_22	CAGGGTTCTGGATATCTGTNGG	none
chr17	81252794	81252816	chr17:81252794-81252816	10	-	0	CAGGGGAGGTGGTATCTGTTGG	6		CRL1684_TRAC_Tcell_19bp.bam	None	None	None_None_chr17:81252794-81252816_10	CAGGGTTCTGGATATCTGTNGG	none
chr17	83082702	83082724	chr17:83082702-83082724	8	+	0	TGAGGTGCTGGATATTTGGAGG	6		CRL1684_TRAC_Tcell_19bp.bam	None	None	None_None_chr17:83082702-83082724_8	CAGGGTTCTGGATATCTGTNGG	none
chr18	10474286	10474309	chr18:10474286-10474309	458	-	0			CAGGTTTCTGGATTATCTGTGGG	CRL1684_TRAC_Tcell_19bp.bam	None	None	None_None_chr18:10474286-10474309_458	CAGGGTTCTGGATATCTGTNGG	CAGGGTTCTGGAT-ATCTGTNGG
chr18	12145384	12145406	chr18:12145384-12145406	8	+	0	AAAGGTTTCAGATCTCTGTTGG	6		CRL1684_TRAC_Tcell_19bp.bam	None	None	None_None_chr18:12145384-12145406_8	CAGGGTTCTGGATATCTGTNGG	none
chr18	23680848	23680870	chr18:23680848-23680870	16	-	0	CAGGTTGATAAATATCTGTCAG	6		CRL1684_TRAC_Tcell_19bp.bam	None	None	None_None_chr18:23680848-23680870_16	CAGGGTTCTGGATATCTGTNGG	none
chr18	26296998	26297020	chr18:26296998-26297020	6	+	0	CATGGTGGTGCATGTCTGTAGT	6		CRL1684_TRAC_Tcell_19bp.bam	None	None	None_None_chr18:26296998-26297020_6	CAGGGTTCTGGATATCTGTNGG	none
chr18	27080024	27080046	chr18:27080024-27080046	42	+	0	TTAGATTGTGGATATCTTTGGG	6		CRL1684_TRAC_Tcell_19bp.bam	None	None	None_None_chr18:27080024-27080046_42	CAGGGTTCTGGATATCTGTNGG	none
chr18	28607973	28607995	chr18:28607973-28607995	482	-	0	AGGGGTTCTGTATATCTGTTGG	3	CAGGGGTTCTGTATATCTGTTGG	CRL1684_TRAC_Tcell_19bp.bam	None	None	None_None_chr18:28607973-28607995_482	CAGGGTTCTGGATATCTGTNGG	CAGGG-TTCTGGATATCTGTNGG
chr18	2910957	2910979	chr18:2910957-2910979	40	-	0	CAGAGGCCTGGAGGTCTGTGGG	5		CRL1684_TRAC_Tcell_19bp.bam	None	None	None_None_chr18:2910957-2910979_40	CAGGGTTCTGGATATCTGTNGG	none
chr18	33086196	33086218	chr18:33086196-33086218	8	+	0	CAGCATTCTGGATACCTGTGGA	4		CRL1684_TRAC_Tcell_19bp.bam	None	None	None_None_chr18:33086196-33086218_8	CAGGGTTCTGGATATCTGTNGG	none
chr18	33340229	33340251	chr18:33340229-33340251	14	-	0	CAAAGTTCCATATATCTCTGGG	6		CRL1684_TRAC_Tcell_19bp.bam	None	None	None_None_chr18:33340229-33340251_14	CAGGGTTCTGGATATCTGTNGG	none
chr18	38890205	38890227	chr18:38890205-38890227	24	-	0	CAGGATTCAAATTATCTTTCGG	6		CRL1684_TRAC_Tcell_19bp.bam	None	None	None_None_chr18:38890205-38890227_24	CAGGGTTCTGGATATCTGTNGG	none
chr18	41613184	41613206	chr18:41613184-41613206	12	-	0	CTGTCCTCTGGTTATCTGTGGG	5		CRL1684_TRAC_Tcell_19bp.bam	None	None	None_None_chr18:41613184-41613206_12	CAGGGTTCTGGATATCTGTNGG	none
chr18	42253770	42253792	chr18:42253770-42253792	10	+	0	GAGTTCTGTGGATATCTGTCAG	6		CRL1684_TRAC_Tcell_19bp.bam	None	None	None_None_chr18:42253770-42253792_10	CAGGGTTCTGGATATCTGTNGG	none
chr18	47392776	47392797	chr18:47392776-47392797	28	-	0			GAGGCTTCTGGATA-CTGTGGG	CRL1684_TRAC_Tcell_19bp.bam	None	None	None_None_chr18:47392776-47392797_28	CAGGGTTCTGGATATCTGTNGG	CAGGGTTCTGGATATCTGTNGG
chr18	49827990	49828012	chr18:49827990-49828012	20	-	0	CATGGATCTGGGTATCTGTGGG	3		CRL1684_TRAC_Tcell_19bp.bam	None	None	None_None_chr18:49827990-49828012_20	CAGGGTTCTGGATATCTGTNGG	none
chr18	49974348	49974370	chr18:49974348-49974370	62	-	0	CGGGGTCCTGGACATCTATGGG	4		CRL1684_TRAC_Tcell_19bp.bam	None	None	None_None_chr18:49974348-49974370_62	CAGGGTTCTGGATATCTGTNGG	none
chr18	52308717	52308739	chr18:52308717-52308739	26	+	0	TTTGGTTATGGATTACTGTTGG	6		CRL1684_TRAC_Tcell_19bp.bam	None	None	None_None_chr18:52308717-52308739_26	CAGGGTTCTGGATATCTGTNGG	none
chr18	55732152	55732174	chr18:55732152-55732174	6	+	0	TTTGGTGCTGGATATCTTTAGG	5		CRL1684_TRAC_Tcell_19bp.bam	None	None	None_None_chr18:55732152-55732174_6	CAGGGTTCTGGATATCTGTNGG	none
chr18	58765039	58765061	chr18:58765039-58765061	26	-	0	CAAGGTCCAGGATATCTCTTGG	4		CRL1684_TRAC_Tcell_19bp.bam	None	None	None_None_chr18:58765039-58765061_26	CAGGGTTCTGGATATCTGTNGG	none
chr18	66988311	66988333	chr18:66988311-66988333	20	-	0	GTGAGTAATGAATATCTGTAGG	6		CRL1684_TRAC_Tcell_19bp.bam	None	None	None_None_chr18:66988311-66988333_20	CAGGGTTCTGGATATCTGTNGG	none
chr18	67357886	67357908	chr18:67357886-67357908	8	+	0	GATGATTTAGGATATCTGGTGG	6		CRL1684_TRAC_Tcell_19bp.bam	None	None	None_None_chr18:67357886-67357908_8	CAGGGTTCTGGATATCTGTNGG	none
chr18	67830984	67831006	chr18:67830984-67831006	24	-	0	CACCGTGGAGGATATCTGTATG	6		CRL1684_TRAC_Tcell_19bp.bam	None	None	None_None_chr18:67830984-67831006_24	CAGGGTTCTGGATATCTGTNGG	none
chr18	73381392	73381414	chr18:73381392-73381414	8	-	0	AAAGTTTCTGGATAGCTCTGGG	5		CRL1684_TRAC_Tcell_19bp.bam	None	None	None_None_chr18:73381392-73381414_8	CAGGGTTCTGGATATCTGTNGG	none
chr18	75099679	75099701	chr18:75099679-75099701	8	-	0	GGGGTTTCTGGATATCTGTCTG	4		CRL1684_TRAC_Tcell_19bp.bam	None	None	None_None_chr18:75099679-75099701_8	CAGGGTTCTGGATATCTGTNGG	none
chr18	77794956	77794978	chr18:77794956-77794978	20	-	0	GGGGCAACTGGATATCTGTAGG	5		CRL1684_TRAC_Tcell_19bp.bam	None	None	None_None_chr18:77794956-77794978_20	CAGGGTTCTGGATATCTGTNGG	none
chr18	9972721	9972743	chr18:9972721-9972743	26	-	0	TTAGGGTGTGGATATCTTTGGG	6	TAGGGTG-TGGATATCTTTGGG	CRL1684_TRAC_Tcell_19bp.bam	None	None	None_None_chr18:9972721-9972743_26	CAGGGTTCTGGATATCTGTNGG	CAGGGTTCTGGATATCTGTNGG
chr19	1058797	1058819	chr19:1058797-1058819	66	-	0	CTGGGGACAGAATATCTGTGGG	5		CRL1684_TRAC_Tcell_19bp.bam	None	None	None_None_chr19:1058797-1058819_66	CAGGGTTCTGGATATCTGTNGG	none
chr19	15101135	15101157	chr19:15101135-15101157	20	+	0	TACTGTGATGGATATCTCTGGG	6		CRL1684_TRAC_Tcell_19bp.bam	None	None	None_None_chr19:15101135-15101157_20	CAGGGTTCTGGATATCTGTNGG	none
chr19	1512262	1512284	chr19:1512262-1512284	128	+	0	TAGGGTCCTGGGTATCTCTAGG	4		CRL1684_TRAC_Tcell_19bp.bam	None	None	None_None_chr19:1512262-1512284_128	CAGGGTTCTGGATATCTGTNGG	none
chr19	1575905	1575927	chr19:1575905-1575927	6	-	0	CGGGGTTCTGGCCATGTCCTGG	6		CRL1684_TRAC_Tcell_19bp.bam	None	None	None_None_chr19:1575905-1575927_6	CAGGGTTCTGGATATCTGTNGG	none
chr19	17387308	17387330	chr19:17387308-17387330	6	-	0	CAGGGGTCTGGGAATCGGTGGG	4		CRL1684_TRAC_Tcell_19bp.bam	None	None	None_None_chr19:17387308-17387330_6	CAGGGTTCTGGATATCTGTNGG	none
chr19	18046562	18046584	chr19:18046562-18046584	34	+	0	CCAGGGTGGGGGTATCTGTGGG	6	CAGGGTGGGGG-TATCTGTGGG	CRL1684_TRAC_Tcell_19bp.bam	None	None	None_None_chr19:18046562-18046584_34	CAGGGTTCTGGATATCTGTNGG	CAGGGTTCTGGATATCTGTNGG
chr19	18885108	18885130	chr19:18885108-18885130	8	-	0	CAGGGAAATGGAAATCTGTGGG	4		CRL1684_TRAC_Tcell_19bp.bam	None	None	None_None_chr19:18885108-18885130_8	CAGGGTTCTGGATATCTGTNGG	none
chr19	2488110	2488132	chr19:2488110-2488132	6	-	0	TAGGGATCTGTAAAGCTGTGGG	5		CRL1684_TRAC_Tcell_19bp.bam	None	None	None_None_chr19:2488110-2488132_6	CAGGGTTCTGGATATCTGTNGG	none
chr19	28521712	28521734	chr19:28521712-28521734	18	+	0	CAGTGAACTAGATTTCTGTGGA	6		CRL1684_TRAC_Tcell_19bp.bam	None	None	None_None_chr19:28521712-28521734_18	CAGGGTTCTGGATATCTGTNGG	none
chr19	30371661	30371683	chr19:30371661-30371683	66	+	0	AGGGTATCTGGATATCTGTAGG	4	GAGGGTATCTGGATATCTGTAGG	CRL1684_TRAC_Tcell_19bp.bam	None	None	None_None_chr19:30371661-30371683_66	CAGGGTTCTGGATATCTGTNGG	CAGGGT-TCTGGATATCTGTNGG
chr19	30685335	30685357	chr19:30685335-30685357	12	+	0	ACTCTTTCTGGATATCTGTGGG	5	CTCT-TTCTGGATATCTGTGGG	CRL1684_TRAC_Tcell_19bp.bam	None	None	None_None_chr19:30685335-30685357_12	CAGGGTTCTGGATATCTGTNGG	CAGGGTTCTGGATATCTGTNGG
chr19	34560502	34560524	chr19:34560502-34560524	6	-	0	CAGAGTCCTGGTTTTCTGTTAG	5		CRL1684_TRAC_Tcell_19bp.bam	None	None	None_None_chr19:34560502-34560524_6	CAGGGTTCTGGATATCTGTNGG	none
chr19	34751246	34751268	chr19:34751246-34751268	6	+	0	CCTGTTTCAGGCTACCTGTGGG	6		CRL1684_TRAC_Tcell_19bp.bam	None	None	None_None_chr19:34751246-34751268_6	CAGGGTTCTGGATATCTGTNGG	none
chr19	35971684	35971706	chr19:35971684-35971706	46	-	0	GAAGGTTCTGGATACCTGGGGT	5	GAAGGTTCTGGATACCTG-GGG	CRL1684_TRAC_Tcell_19bp.bam	None	None	None_None_chr19:35971684-35971706_46	CAGGGTTCTGGATATCTGTNGG	CAGGGTTCTGGATATCTGTNGG
chr19	36750562	36750584	chr19:36750562-36750584	14	+	0	CAGAGTGAGAGATGTCTGTAGG	6		CRL1684_TRAC_Tcell_19bp.bam	None	None	None_None_chr19:36750562-36750584_14	CAGGGTTCTGGATATCTGTNGG	none
chr19	39890056	39890078	chr19:39890056-39890078	12	+	0	CAGGGCACTGGAAGGCTGTGGG	5		CRL1684_TRAC_Tcell_19bp.bam	None	None	None_None_chr19:39890056-39890078_12	CAGGGTTCTGGATATCTGTNGG	none
chr19	4163409	4163431	chr19:4163409-4163431	50	+	0	CGTGTGTGAGGATATCTGTAGG	6		CRL1684_TRAC_Tcell_19bp.bam	None	None	None_None_chr19:4163409-4163431_50	CAGGGTTCTGGATATCTGTNGG	none
chr19	42776981	42777003	chr19:42776981-42777003	14	+	0	CAGGCCTTTGGATAACTGTGGG	4		CRL1684_TRAC_Tcell_19bp.bam	None	None	None_None_chr19:42776981-42777003_14	CAGGGTTCTGGATATCTGTNGG	none
chr19	48937167	48937189	chr19:48937167-48937189	10	+	0	TCAGGTCGTGGATATCTTTGGG	6	CAGG-TCGTGGATATCTTTGGG	CRL1684_TRAC_Tcell_19bp.bam	None	None	None_None_chr19:48937167-48937189_10	CAGGGTTCTGGATATCTGTNGG	CAGGGTTCTGGATATCTGTNGG
chr19	49796132	49796154	chr19:49796132-49796154	28	+	0	CAGGGGTTTTCACATCTGTTGG	5		CRL1684_TRAC_Tcell_19bp.bam	None	None	None_None_chr19:49796132-49796154_28	CAGGGTTCTGGATATCTGTNGG	none
chr19	49918492	49918514	chr19:49918492-49918514	18	+	0	AAGGGACAGGGATACCTGTGGG	6		CRL1684_TRAC_Tcell_19bp.bam	None	None	None_None_chr19:49918492-49918514_18	CAGGGTTCTGGATATCTGTNGG	none
chr19	50042859	50042881	chr19:50042859-50042881	42	+	0	GAGTGAGCTGGATATCTGTGGG	4		CRL1684_TRAC_Tcell_19bp.bam	None	None	None_None_chr19:50042859-50042881_42	CAGGGTTCTGGATATCTGTNGG	none
chr19	51686033	51686055	chr19:51686033-51686055	20	+	0	CTGAGTTCTGGATATTTGTAGG	3		CRL1684_TRAC_Tcell_19bp.bam	None	None	None_None_chr19:51686033-51686055_20	CAGGGTTCTGGATATCTGTNGG	none
chr19	53185097	53185119	chr19:53185097-53185119	18	+	0	TAGGCCTCCGGATAACTGCGGG	6		CRL1684_TRAC_Tcell_19bp.bam	None	None	None_None_chr19:53185097-53185119_18	CAGGGTTCTGGATATCTGTNGG	none
chr19	54466617	54466639	chr19:54466617-54466639	8	+	0	TACAGTCCTTGGTATCTGTGGG	6		CRL1684_TRAC_Tcell_19bp.bam	None	None	None_None_chr19:54466617-54466639_8	CAGGGTTCTGGATATCTGTNGG	none
chr19	55012988	55013010	chr19:55012988-55013010	6	-	0	CTCGGCTGCGAATATCTGTGGG	6		CRL1684_TRAC_Tcell_19bp.bam	None	None	None_None_chr19:55012988-55013010_6	CAGGGTTCTGGATATCTGTNGG	none
chr19	55511107	55511129	chr19:55511107-55511129	20	+	0	AATGGGTATGGATATCTGGTAG	6		CRL1684_TRAC_Tcell_19bp.bam	None	None	None_None_chr19:55511107-55511129_20	CAGGGTTCTGGATATCTGTNGG	none
chr19	5577669	5577691	chr19:5577669-5577691	8	-	0	CATGGAGCTGTGTGTCTGTGGG	6		CRL1684_TRAC_Tcell_19bp.bam	None	None	None_None_chr19:5577669-5577691_8	CAGGGTTCTGGATATCTGTNGG	none
chr19	55839601	55839623	chr19:55839601-55839623	8	+	0	CTCAATTTTTGATATCTGTAGG	6		CRL1684_TRAC_Tcell_19bp.bam	None	None	None_None_chr19:55839601-55839623_8	CAGGGTTCTGGATATCTGTNGG	none
chr19	56719000	56719022	chr19:56719000-56719022	18	+	0	CAGGCCTCCGGATAACTGTGGG	4		CRL1684_TRAC_Tcell_19bp.bam	None	None	None_None_chr19:56719000-56719022_18	CAGGGTTCTGGATATCTGTNGG	none
chr19	6446665	6446687	chr19:6446665-6446687	22	-	0	CAGCCCTCTAGAGATCTGTGGG	5		CRL1684_TRAC_Tcell_19bp.bam	None	None	None_None_chr19:6446665-6446687_22	CAGGGTTCTGGATATCTGTNGG	none
chr19	8529868	8529890	chr19:8529868-8529890	86	+	0	CTGGGGGATAGATACCTGTGGG	6		CRL1684_TRAC_Tcell_19bp.bam	None	None	None_None_chr19:8529868-8529890_86	CAGGGTTCTGGATATCTGTNGG	none
chr19	9046029	9046051	chr19:9046029-9046051	14	+	0	CATGGTTCTGCATATATGTCAG	4		CRL1684_TRAC_Tcell_19bp.bam	None	None	None_None_chr19:9046029-9046051_14	CAGGGTTCTGGATATCTGTNGG	none
chr1	101088569	101088591	chr1:101088569-101088591	8	+	0	CTGGGCTATATATACCTGTTGG	6		CRL1684_TRAC_Tcell_19bp.bam	None	None	None_None_chr1:101088569-101088591_8	CAGGGTTCTGGATATCTGTNGG	none
chr1	102025513	102025535	chr1:102025513-102025535	28	-	0	ATGGCTTCTGGTTACCTGTAGG	5		CRL1684_TRAC_Tcell_19bp.bam	None	None	None_None_chr1:102025513-102025535_28	CAGGGTTCTGGATATCTGTNGG	none
chr1	103548386	103548408	chr1:103548386-103548408	26	-	0	GATGATTTAGGGTATCTGTCGG	6		CRL1684_TRAC_Tcell_19bp.bam	None	None	None_None_chr1:103548386-103548408_26	CAGGGTTCTGGATATCTGTNGG	none
chr1	106814842	106814864	chr1:106814842-106814864	8	-	0	GAGCCATGTGGATATCTGCAGG	6		CRL1684_TRAC_Tcell_19bp.bam	None	None	None_None_chr1:106814842-106814864_8	CAGGGTTCTGGATATCTGTNGG	none
chr1	107035623	107035645	chr1:107035623-107035645	8	-	0	CAGGCTTCTTTTCAACTGTTGG	6		CRL1684_TRAC_Tcell_19bp.bam	None	None	None_None_chr1:107035623-107035645_8	CAGGGTTCTGGATATCTGTNGG	none
chr1	110182566	110182588	chr1:110182566-110182588	20	+	0	CTGAGGGCGGGATAGCTGTGGG	6		CRL1684_TRAC_Tcell_19bp.bam	None	None	None_None_chr1:110182566-110182588_20	CAGGGTTCTGGATATCTGTNGG	none
chr1	112125144	112125166	chr1:112125144-112125166	20	+	0	AAGGACCCTGGACATCTGTGGG	5		CRL1684_TRAC_Tcell_19bp.bam	None	None	None_None_chr1:112125144-112125166_20	CAGGGTTCTGGATATCTGTNGG	none
chr1	11260925	11260947	chr1:11260925-11260947	8	-	0	CGTGGTGCTGCACATCTGTAGT	6		CRL1684_TRAC_Tcell_19bp.bam	None	None	None_None_chr1:11260925-11260947_8	CAGGGTTCTGGATATCTGTNGG	none
chr1	112727011	112727034	chr1:112727011-112727034	18	-	0			CAGGGTATCTGAAGAACTGTGGG	CRL1684_TRAC_Tcell_19bp.bam	None	None	None_None_chr1:112727011-112727034_18	CAGGGTTCTGGATATCTGTNGG	CAGGGT-TCTGGATATCTGTNGG
chr1	113327124	113327146	chr1:113327124-113327146	30	+	0	GATGCTTATGGATATTTGTTGG	5		CRL1684_TRAC_Tcell_19bp.bam	None	None	None_None_chr1:113327124-113327146_30	CAGGGTTCTGGATATCTGTNGG	none
chr1	11353496	11353518	chr1:11353496-11353518	14	+	0	CACAGGATGGGATATCTGTGGG	6		CRL1684_TRAC_Tcell_19bp.bam	None	None	None_None_chr1:11353496-11353518_14	CAGGGTTCTGGATATCTGTNGG	none
chr1	114594233	114594255	chr1:114594233-114594255	62	+	0	GAGTCATGTGGATATCTGCGGG	6		CRL1684_TRAC_Tcell_19bp.bam	None	None	None_None_chr1:114594233-114594255_62	CAGGGTTCTGGATATCTGTNGG	none
chr1	115289963	115289985	chr1:115289963-115289985	24	-	0	GAGGGTCCAGGATATCAGGTGG	5		CRL1684_TRAC_Tcell_19bp.bam	None	None	None_None_chr1:115289963-115289985_24	CAGGGTTCTGGATATCTGTNGG	none
chr1	115335560	115335582	chr1:115335560-115335582	6	-	0	AAAATCTCTGGATATCTGTGTG	6		CRL1684_TRAC_Tcell_19bp.bam	None	None	None_None_chr1:115335560-115335582_6	CAGGGTTCTGGATATCTGTNGG	none
chr1	117200726	117200748	chr1:117200726-117200748	22	+	0	CAAGGCCCTAGATGTCTGTTGG	5		CRL1684_TRAC_Tcell_19bp.bam	None	None	None_None_chr1:117200726-117200748_22	CAGGGTTCTGGATATCTGTNGG	none
chr1	117642819	117642841	chr1:117642819-117642841	42	+	0	CCCAGATGTGGATATCTGTAGG	5		CRL1684_TRAC_Tcell_19bp.bam	None	None	None_None_chr1:117642819-117642841_42	CAGGGTTCTGGATATCTGTNGG	none
chr1	12199845	12199867	chr1:12199845-12199867	6	+	0	CAGGGGCCAGGGCAGCTGTTGG	6		CRL1684_TRAC_Tcell_19bp.bam	None	None	None_None_chr1:12199845-12199867_6	CAGGGTTCTGGATATCTGTNGG	none
chr1	12357332	12357354	chr1:12357332-12357354	340	+	0	GAGAGTTCTGGATATTGTAGGG	6	GAGAGTTCTGGATAT-TGTAGG	CRL1684_TRAC_Tcell_19bp.bam	None	None	None_None_chr1:12357332-12357354_340	CAGGGTTCTGGATATCTGTNGG	CAGGGTTCTGGATATCTGTNGG
chr1	146017867	146017889	chr1:146017867-146017889	10	-	0	CTGCATTCCGGATCTCTGTGGG	5		CRL1684_TRAC_Tcell_19bp.bam	None	None	None_None_chr1:146017867-146017889_10	CAGGGTTCTGGATATCTGTNGG	none
chr1	147878285	147878307	chr1:147878285-147878307	84	-	0	CCGGGGGGAGGACATCTGTGGG	6		CRL1684_TRAC_Tcell_19bp.bam	None	None	None_None_chr1:147878285-147878307_84	CAGGGTTCTGGATATCTGTNGG	none
chr1	150488608	150488630	chr1:150488608-150488630	10	+	0	GGGTGTTCAGGATATCTGTTAC	6		CRL1684_TRAC_Tcell_19bp.bam	None	None	None_None_chr1:150488608-150488630_10	CAGGGTTCTGGATATCTGTNGG	none
chr1	150981741	150981763	chr1:150981741-150981763	28	-	0	AGGGATTGTGTATATCTGTGGA	6	CAGGGATTGTGTATATCTGTGGA	CRL1684_TRAC_Tcell_19bp.bam	None	None	None_None_chr1:150981741-150981763_28	CAGGGTTCTGGATATCTGTNGG	CAGGG-TTCTGGATATCTGTNGG
chr1	153129671	153129693	chr1:153129671-153129693	12	+	0	CGGTGTTTTCGGTATCTGTCTG	6		CRL1684_TRAC_Tcell_19bp.bam	None	None	None_None_chr1:153129671-153129693_12	CAGGGTTCTGGATATCTGTNGG	none
chr1	154470448	154470470	chr1:154470448-154470470	18	+	0	AACCTTTCTGAATATCTGTGAG	6		CRL1684_TRAC_Tcell_19bp.bam	None	None	None_None_chr1:154470448-154470470_18	CAGGGTTCTGGATATCTGTNGG	none
chr1	154729909	154729931	chr1:154729909-154729931	12	-	0	AAAGCTTCTGGATATCTGCAGG	4		CRL1684_TRAC_Tcell_19bp.bam	None	None	None_None_chr1:154729909-154729931_12	CAGGGTTCTGGATATCTGTNGG	none
chr1	157492167	157492190	chr1:157492167-157492190	14	+	0			CAGGCTTCTGAATAATCTCTGGG	CRL1684_TRAC_Tcell_19bp.bam	None	None	None_None_chr1:157492167-157492190_14	CAGGGTTCTGGATATCTGTNGG	CAGGGTTCTGGATA-TCTGTNGG
chr1	157730629	157730651	chr1:157730629-157730651	6	-	0	CTGGGATCTGGATATCTTTGAG	4		CRL1684_TRAC_Tcell_19bp.bam	None	None	None_None_chr1:157730629-157730651_6	CAGGGTTCTGGATATCTGTNGG	none
chr1	158183869	158183891	chr1:158183869-158183891	18	+	0	CAGGGGATTGGATATATGTAGA	5		CRL1684_TRAC_Tcell_19bp.bam	None	None	None_None_chr1:158183869-158183891_18	CAGGGTTCTGGATATCTGTNGG	none
chr1	159312290	159312311	chr1:159312290-159312311	70	+	0			ATGGATTCTGGATA-CTGTAGG	CRL1684_TRAC_Tcell_19bp.bam	None	None	None_None_chr1:159312290-159312311_70	CAGGGTTCTGGATATCTGTNGG	CAGGGTTCTGGATATCTGTNGG
chr1	160285456	160285478	chr1:160285456-160285478	20	-	0	TTAGATTCTGGTTATTTGTAGG	6		CRL1684_TRAC_Tcell_19bp.bam	None	None	None_None_chr1:160285456-160285478_20	CAGGGTTCTGGATATCTGTNGG	none
chr1	161353225	161353247	chr1:161353225-161353247	24	+	0	TCAGGGTCTGGTTTTCTGTTGG	6	CAGGGT-CTGGTTTTCTGTTGG	CRL1684_TRAC_Tcell_19bp.bam	None	None	None_None_chr1:161353225-161353247_24	CAGGGTTCTGGATATCTGTNGG	CAGGGTTCTGGATATCTGTNGG
chr1	161549761	161549783	chr1:161549761-161549783	412	-	0	TAGGGCTCCGGATATCTTTGGT	5	TAGGGCTCCGGATATCT-TTGG	CRL1684_TRAC_Tcell_19bp.bam	None	None	None_None_chr1:161549761-161549783_412	CAGGGTTCTGGATATCTGTNGG	CAGGGTTCTGGATATCTGTNGG
chr1	161631119	161631141	chr1:161631119-161631141	390	-	0	TAGGGCTCCGGATATCTTTGGT	5	TAGGGCTCCGGATATCT-TTGG	CRL1684_TRAC_Tcell_19bp.bam	None	None	None_None_chr1:161631119-161631141_390	CAGGGTTCTGGATATCTGTNGG	CAGGGTTCTGGATATCTGTNGG
chr1	16197400	16197422	chr1:16197400-16197422	12	-	0	CTAGGGCATGGATATCTTTTGG	6		CRL1684_TRAC_Tcell_19bp.bam	None	None	None_None_chr1:16197400-16197422_12	CAGGGTTCTGGATATCTGTNGG	none
chr1	162149263	162149284	chr1:162149263-162149284	8	+	0			CAGAGC-CTGGATATCTGAAGG	CRL1684_TRAC_Tcell_19bp.bam	None	None	None_None_chr1:162149263-162149284_8	CAGGGTTCTGGATATCTGTNGG	CAGGGTTCTGGATATCTGTNGG
chr1	163558537	163558559	chr1:163558537-163558559	8	+	0	CTGGGTCCTAGATATATTTTGG	5		CRL1684_TRAC_Tcell_19bp.bam	None	None	None_None_chr1:163558537-163558559_8	CAGGGTTCTGGATATCTGTNGG	none
chr1	163589094	163589116	chr1:163589094-163589116	26	-	0	AATCATTCTGGATATCTGTGGG	4		CRL1684_TRAC_Tcell_19bp.bam	None	None	None_None_chr1:163589094-163589116_26	CAGGGTTCTGGATATCTGTNGG	none
chr1	165088817	165088839	chr1:165088817-165088839	22	-	0	TTTGGTTCTGTTTATATGTTGG	6		CRL1684_TRAC_Tcell_19bp.bam	None	None	None_None_chr1:165088817-165088839_22	CAGGGTTCTGGATATCTGTNGG	none
chr1	165230545	165230567	chr1:165230545-165230567	28	-	0	CAGGGCAGTGGAAACCTGTTGG	5		CRL1684_TRAC_Tcell_19bp.bam	None	None	None_None_chr1:165230545-165230567_28	CAGGGTTCTGGATATCTGTNGG	none
chr1	166237132	166237154	chr1:166237132-166237154	8	+	0	TATTGTTCTAGATATATGTAGG	5		CRL1684_TRAC_Tcell_19bp.bam	None	None	None_None_chr1:166237132-166237154_8	CAGGGTTCTGGATATCTGTNGG	none
chr1	166313156	166313178	chr1:166313156-166313178	8	+	0	GTTGGTTCTGCTTATATGTTGG	6		CRL1684_TRAC_Tcell_19bp.bam	None	None	None_None_chr1:166313156-166313178_8	CAGGGTTCTGGATATCTGTNGG	none
chr1	169262439	169262461	chr1:169262439-169262461	12	+	0	TAAGTTTTTGGATATCTGGGGG	5		CRL1684_TRAC_Tcell_19bp.bam	None	None	None_None_chr1:169262439-169262461_12	CAGGGTTCTGGATATCTGTNGG	none
chr1	169359083	169359104	chr1:169359083-169359104	60	-	0			AAGGATTCTGG-TATCTGTAGG	CRL1684_TRAC_Tcell_19bp.bam	None	None	None_None_chr1:169359083-169359104_60	CAGGGTTCTGGATATCTGTNGG	CAGGGTTCTGGATATCTGTNGG
chr1	175799302	175799324	chr1:175799302-175799324	8	-	0	CACGTTTTCATATATCTGTTGG	6		CRL1684_TRAC_Tcell_19bp.bam	None	None	None_None_chr1:175799302-175799324_8	CAGGGTTCTGGATATCTGTNGG	none
chr1	17861947	17861969	chr1:17861947-17861969	6	+	0	AAGGGAGCTAGATGTCTGTGGG	5		CRL1684_TRAC_Tcell_19bp.bam	None	None	None_None_chr1:17861947-17861969_6	CAGGGTTCTGGATATCTGTNGG	none
chr1	17863470	17863492	chr1:17863470-17863492	30	-	0	AAGGGTTCAGGAATTCTGTGAG	5		CRL1684_TRAC_Tcell_19bp.bam	None	None	None_None_chr1:17863470-17863492_30	CAGGGTTCTGGATATCTGTNGG	none
chr1	179085047	179085069	chr1:179085047-179085069	8	+	0	AACTGTTCTGGGTATCTGCAGG	5		CRL1684_TRAC_Tcell_19bp.bam	None	None	None_None_chr1:179085047-179085069_8	CAGGGTTCTGGATATCTGTNGG	none
chr1	179745946	179745968	chr1:179745946-179745968	16	-	0	TGGGGTTATAAATATCTCTTGG	6		CRL1684_TRAC_Tcell_19bp.bam	None	None	None_None_chr1:179745946-179745968_16	CAGGGTTCTGGATATCTGTNGG	none
chr1	185373075	185373097	chr1:185373075-185373097	16	-	0	GAAGATTATAGATATCTTTGGG	6		CRL1684_TRAC_Tcell_19bp.bam	None	None	None_None_chr1:185373075-185373097_16	CAGGGTTCTGGATATCTGTNGG	none
chr1	186351297	186351319	chr1:186351297-186351319	552	-	0	CAGAGTTCTGAATTTCTGTAGG	3		CRL1684_TRAC_Tcell_19bp.bam	None	None	None_None_chr1:186351297-186351319_552	CAGGGTTCTGGATATCTGTNGG	none
chr1	188290419	188290441	chr1:188290419-188290441	14	-	0	GATGATTTAGGATATCTGGTGG	6		CRL1684_TRAC_Tcell_19bp.bam	None	None	None_None_chr1:188290419-188290441_14	CAGGGTTCTGGATATCTGTNGG	none
chr1	191526567	191526589	chr1:191526567-191526589	18	+	0	CTCTCTTCTTGATATCTGTCTG	6		CRL1684_TRAC_Tcell_19bp.bam	None	None	None_None_chr1:191526567-191526589_18	CAGGGTTCTGGATATCTGTNGG	none
chr1	200280967	200280989	chr1:200280967-200280989	36	-	0	CTGCATGTTGGATATCTGTTGA	6		CRL1684_TRAC_Tcell_19bp.bam	None	None	None_None_chr1:200280967-200280989_36	CAGGGTTCTGGATATCTGTNGG	none
chr1	201118655	201118677	chr1:201118655-201118677	10	+	0	GAGGGTCCTGGATATCCTGGGA	6	GAGGGTCCTGGATATCC-TGGG	CRL1684_TRAC_Tcell_19bp.bam	None	None	None_None_chr1:201118655-201118677_10	CAGGGTTCTGGATATCTGTNGG	CAGGGTTCTGGATATCTGTNGG
chr1	201381994	201382016	chr1:201381994-201382016	12	-	0	CAGGGCTCTGACTCCTTGTGGG	6		CRL1684_TRAC_Tcell_19bp.bam	None	None	None_None_chr1:201381994-201382016_12	CAGGGTTCTGGATATCTGTNGG	none
chr1	202487934	202487957	chr1:202487934-202487957	6	-	0			TAGGGTTCTGTACTATCTGTAGG	CRL1684_TRAC_Tcell_19bp.bam	None	None	None_None_chr1:202487934-202487957_6	CAGGGTTCTGGATATCTGTNGG	CAGGGTTCTGGA-TATCTGTNGG
chr1	203914251	203914273	chr1:203914251-203914273	8	+	0	AAGGGGAAAGGATATCTGCCGG	6		CRL1684_TRAC_Tcell_19bp.bam	None	None	None_None_chr1:203914251-203914273_8	CAGGGTTCTGGATATCTGTNGG	none
chr1	20404894	20404916	chr1:20404894-20404916	24	-	0	CAGGCTCGTGGCTATCTGTCGG	4		CRL1684_TRAC_Tcell_19bp.bam	None	None	None_None_chr1:20404894-20404916_24	CAGGGTTCTGGATATCTGTNGG	none
chr1	204782723	204782744	chr1:204782723-204782744	12	-	0			CAGGCTTATAGA-ATCTGTGGG	CRL1684_TRAC_Tcell_19bp.bam	None	None	None_None_chr1:204782723-204782744_12	CAGGGTTCTGGATATCTGTNGG	CAGGGTTCTGGATATCTGTNGG
chr1	208544438	208544460	chr1:208544438-208544460	6	-	0	ACTGGACTTGGATATCTGTGGG	6	CTGGACT-TGGATATCTGTGGG	CRL1684_TRAC_Tcell_19bp.bam	None	None	None_None_chr1:208544438-208544460_6	CAGGGTTCTGGATATCTGTNGG	CAGGGTTCTGGATATCTGTNGG
chr1	213833305	213833327	chr1:213833305-213833327	42	-	0	TGGGGCTCTGGATATCCATGGG	5		CRL1684_TRAC_Tcell_19bp.bam	None	None	None_None_chr1:213833305-213833327_42	CAGGGTTCTGGATATCTGTNGG	none
chr1	214576659	214576681	chr1:214576659-214576681	40	-	0	CAAAGTTCTGCATATCTCTAGG	4		CRL1684_TRAC_Tcell_19bp.bam	None	None	None_None_chr1:214576659-214576681_40	CAGGGTTCTGGATATCTGTNGG	none
chr1	214857612	214857634	chr1:214857612-214857634	18	+	0	CTGGGAGATGGATATATGTTGG	5		CRL1684_TRAC_Tcell_19bp.bam	None	None	None_None_chr1:214857612-214857634_18	CAGGGTTCTGGATATCTGTNGG	none
chr1	218176818	218176840	chr1:218176818-218176840	20	-	0	CATTGTTCTGGTTATCTATTGC	5		CRL1684_TRAC_Tcell_19bp.bam	None	None	None_None_chr1:218176818-218176840_20	CAGGGTTCTGGATATCTGTNGG	none
chr1	222019627	222019649	chr1:222019627-222019649	28	-	0	TCTGGTCCTGGAGATCTGTAGG	5	CTGG-TCCTGGAGATCTGTAGG	CRL1684_TRAC_Tcell_19bp.bam	None	None	None_None_chr1:222019627-222019649_28	CAGGGTTCTGGATATCTGTNGG	CAGGGTTCTGGATATCTGTNGG
chr1	222159563	222159585	chr1:222159563-222159585	30	-	0	ACATCTTCTGGATATCTGTGGT	6	CATC-TTCTGGATATCTGTGGT	CRL1684_TRAC_Tcell_19bp.bam	None	None	None_None_chr1:222159563-222159585_30	CAGGGTTCTGGATATCTGTNGG	CAGGGTTCTGGATATCTGTNGG
chr1	222622374	222622396	chr1:222622374-222622396	114	+	0	AAGGGTCCTCGATATCTTTAGG	4		CRL1684_TRAC_Tcell_19bp.bam	None	None	None_None_chr1:222622374-222622396_114	CAGGGTTCTGGATATCTGTNGG	none
chr1	22426672	22426694	chr1:22426672-22426694	20	+	0	AAGCCATGTGGATATCTGAGGG	6		CRL1684_TRAC_Tcell_19bp.bam	None	None	None_None_chr1:22426672-22426694_20	CAGGGTTCTGGATATCTGTNGG	none
chr1	225726059	225726081	chr1:225726059-225726081	10	-	0	AATGGCTCAGGAAATCTGTTGG	5		CRL1684_TRAC_Tcell_19bp.bam	None	None	None_None_chr1:225726059-225726081_10	CAGGGTTCTGGATATCTGTNGG	none
chr1	226434716	226434738	chr1:226434716-226434738	24	-	0	GATCTTTGTGGATATCTGTTAG	6		CRL1684_TRAC_Tcell_19bp.bam	None	None	None_None_chr1:226434716-226434738_24	CAGGGTTCTGGATATCTGTNGG	none
chr1	228272767	228272789	chr1:228272767-228272789	8	+	0	CTGGGCCCTAGATCTCTGTAAG	6		CRL1684_TRAC_Tcell_19bp.bam	None	None	None_None_chr1:228272767-228272789_8	CAGGGTTCTGGATATCTGTNGG	none
chr1	23070072	23070094	chr1:23070072-23070094	10	+	0	AAGTGGCCAGGATACCTGTAGG	6		CRL1684_TRAC_Tcell_19bp.bam	None	None	None_None_chr1:23070072-23070094_10	CAGGGTTCTGGATATCTGTNGG	none
chr1	231522077	231522099	chr1:231522077-231522099	6	+	0	AAGGGAGCAAGAAATCTGTGGG	6		CRL1684_TRAC_Tcell_19bp.bam	None	None	None_None_chr1:231522077-231522099_6	CAGGGTTCTGGATATCTGTNGG	none
chr1	232906526	232906548	chr1:232906526-232906548	18	-	0	AAGAGTCATGAATATCTATGGG	6		CRL1684_TRAC_Tcell_19bp.bam	None	None	None_None_chr1:232906526-232906548_18	CAGGGTTCTGGATATCTGTNGG	none
chr1	23438819	23438841	chr1:23438819-23438841	18	+	0	CGGGGGCCGGTTTATCTGTGGG	6		CRL1684_TRAC_Tcell_19bp.bam	None	None	None_None_chr1:23438819-23438841_18	CAGGGTTCTGGATATCTGTNGG	none
chr1	23492555	23492577	chr1:23492555-23492577	198	-	0	TGGCCATGTGGATATCTGTGGG	6		CRL1684_TRAC_Tcell_19bp.bam	None	None	None_None_chr1:23492555-23492577_198	CAGGGTTCTGGATATCTGTNGG	none
chr1	236540431	236540453	chr1:236540431-236540453	10	+	0	CATGTGTGTGGAGACCTGTGGG	6		CRL1684_TRAC_Tcell_19bp.bam	None	None	None_None_chr1:236540431-236540453_10	CAGGGTTCTGGATATCTGTNGG	none
chr1	245477627	245477649	chr1:245477627-245477649	22	+	0	CAGGTGTCTGGATATCTCTGAG	4		CRL1684_TRAC_Tcell_19bp.bam	None	None	None_None_chr1:245477627-245477649_22	CAGGGTTCTGGATATCTGTNGG	none
chr1	246685165	246685187	chr1:246685165-246685187	214	-	0	AAGGGTACTAGATATCTGGGGT	5	AAGGGTACTAGATATCTG-GGG	CRL1684_TRAC_Tcell_19bp.bam	None	None	None_None_chr1:246685165-246685187_214	CAGGGTTCTGGATATCTGTNGG	CAGGGTTCTGGATATCTGTNGG
chr1	247485535	247485557	chr1:247485535-247485557	26	-	0	CTTGAGTTTGGGTATCTGTGGG	6		CRL1684_TRAC_Tcell_19bp.bam	None	None	None_None_chr1:247485535-247485557_26	CAGGGTTCTGGATATCTGTNGG	none
chr1	247635983	247636004	chr1:247635983-247636004	34	-	0			TAGGGTACTGGTTAT-TGTTGG	CRL1684_TRAC_Tcell_19bp.bam	None	None	None_None_chr1:247635983-247636004_34	CAGGGTTCTGGATATCTGTNGG	CAGGGTTCTGGATATCTGTNGG
chr1	31895124	31895146	chr1:31895124-31895146	26	-	0	ACAGATTCTGGATATTTGTTGG	5	CAGA-TTCTGGATATTTGTTGG	CRL1684_TRAC_Tcell_19bp.bam	None	None	None_None_chr1:31895124-31895146_26	CAGGGTTCTGGATATCTGTNGG	CAGGGTTCTGGATATCTGTNGG
chr1	33145979	33146001	chr1:33145979-33146001	6	+	0	CAGGCCTCAGGACATCTATTGG	5		CRL1684_TRAC_Tcell_19bp.bam	None	None	None_None_chr1:33145979-33146001_6	CAGGGTTCTGGATATCTGTNGG	none
chr1	35338491	35338513	chr1:35338491-35338513	20	+	0	CTCGGGTTTTGGTATCTGTGGG	6	TCGGGTTTTGG-TATCTGTGGG	CRL1684_TRAC_Tcell_19bp.bam	None	None	None_None_chr1:35338491-35338513_20	CAGGGTTCTGGATATCTGTNGG	CAGGGTTCTGGATATCTGTNGG
chr1	35434653	35434675	chr1:35434653-35434675	6	+	0	CTGAGGTGAGGATATCTGGGGG	6		CRL1684_TRAC_Tcell_19bp.bam	None	None	None_None_chr1:35434653-35434675_6	CAGGGTTCTGGATATCTGTNGG	none
chr1	36748809	36748831	chr1:36748809-36748831	10	+	0	TTGGGACATGGATATCTTTGGG	6		CRL1684_TRAC_Tcell_19bp.bam	None	None	None_None_chr1:36748809-36748831_10	CAGGGTTCTGGATATCTGTNGG	none
chr1	3750384	3750406	chr1:3750384-3750406	16	+	0	TGGGGTCATGAATTTCTGTGGG	6		CRL1684_TRAC_Tcell_19bp.bam	None	None	None_None_chr1:3750384-3750406_16	CAGGGTTCTGGATATCTGTNGG	none
chr1	39076578	39076599	chr1:39076578-39076599	12	-	0			GAGAGTTCTGGGT-TCTGTCGG	CRL1684_TRAC_Tcell_19bp.bam	None	None	None_None_chr1:39076578-39076599_12	CAGGGTTCTGGATATCTGTNGG	CAGGGTTCTGGATATCTGTNGG
chr1	39345928	39345950	chr1:39345928-39345950	28	+	0	CATGGTGGTGAGTACCTGTAGG	6		CRL1684_TRAC_Tcell_19bp.bam	None	None	None_None_chr1:39345928-39345950_28	CAGGGTTCTGGATATCTGTNGG	none
chr1	4072366	4072388	chr1:4072366-4072388	20	+	0	CTCTATCCTGGCTATCTGTGGG	6		CRL1684_TRAC_Tcell_19bp.bam	None	None	None_None_chr1:4072366-4072388_20	CAGGGTTCTGGATATCTGTNGG	none
chr1	41813926	41813948	chr1:41813926-41813948	34	-	0	CAGAGCCCTAGACATCTGTAGG	5		CRL1684_TRAC_Tcell_19bp.bam	None	None	None_None_chr1:41813926-41813948_34	CAGGGTTCTGGATATCTGTNGG	none
chr1	4198488	4198510	chr1:4198488-4198510	10	-	0	TAAGTCTCAGGATATCTGATGG	6		CRL1684_TRAC_Tcell_19bp.bam	None	None	None_None_chr1:4198488-4198510_10	CAGGGTTCTGGATATCTGTNGG	none
chr1	43659919	43659941	chr1:43659919-43659941	12	+	0	CTGGGTTTTGGTTGTCTGTGGA	5		CRL1684_TRAC_Tcell_19bp.bam	None	None	None_None_chr1:43659919-43659941_12	CAGGGTTCTGGATATCTGTNGG	none
chr1	46057704	46057726	chr1:46057704-46057726	14	+	0	GATGATTTAGGATATCTGGCGG	6		CRL1684_TRAC_Tcell_19bp.bam	None	None	None_None_chr1:46057704-46057726_14	CAGGGTTCTGGATATCTGTNGG	none
chr1	46620638	46620660	chr1:46620638-46620660	6	+	0	CAGGGTCCTGGAGAGCAGTGGG	4		CRL1684_TRAC_Tcell_19bp.bam	None	None	None_None_chr1:46620638-46620660_6	CAGGGTTCTGGATATCTGTNGG	none
chr1	47262916	47262938	chr1:47262916-47262938	6	+	0	AAATTTTCTGGTTATCTGATGG	6		CRL1684_TRAC_Tcell_19bp.bam	None	None	None_None_chr1:47262916-47262938_6	CAGGGTTCTGGATATCTGTNGG	none
chr1	47435700	47435722	chr1:47435700-47435722	8	+	0	CATGGTGTGGGGTATCTGTGAG	6		CRL1684_TRAC_Tcell_19bp.bam	None	None	None_None_chr1:47435700-47435722_8	CAGGGTTCTGGATATCTGTNGG	none
chr1	54695328	54695350	chr1:54695328-54695350	8	+	0	CCTGGGGCTGGATACCTGAGGG	6		CRL1684_TRAC_Tcell_19bp.bam	None	None	None_None_chr1:54695328-54695350_8	CAGGGTTCTGGATATCTGTNGG	none
chr1	5671018	5671040	chr1:5671018-5671040	48	+	0	GTGGGATGGGGGTATCTGTGGG	6		CRL1684_TRAC_Tcell_19bp.bam	None	None	None_None_chr1:5671018-5671040_48	CAGGGTTCTGGATATCTGTNGG	none
chr1	56978669	56978691	chr1:56978669-56978691	8	-	0	TATCTTTGTGGATACCTGTGGG	6		CRL1684_TRAC_Tcell_19bp.bam	None	None	None_None_chr1:56978669-56978691_8	CAGGGTTCTGGATATCTGTNGG	none
chr1	57550996	57551018	chr1:57550996-57551018	32	+	0	CAGGAATCTGGATATCTCAGGG	4		CRL1684_TRAC_Tcell_19bp.bam	None	None	None_None_chr1:57550996-57551018_32	CAGGGTTCTGGATATCTGTNGG	none
chr1	57970825	57970847	chr1:57970825-57970847	8	-	0	GAAGGCTCTGGATATCTGTGAC	5		CRL1684_TRAC_Tcell_19bp.bam	None	None	None_None_chr1:57970825-57970847_8	CAGGGTTCTGGATATCTGTNGG	none
chr1	60828700	60828722	chr1:60828700-60828722	10	-	0	AAGGGGTGGGGATATCTGAAGG	5		CRL1684_TRAC_Tcell_19bp.bam	None	None	None_None_chr1:60828700-60828722_10	CAGGGTTCTGGATATCTGTNGG	none
chr1	63954821	63954843	chr1:63954821-63954843	14	+	0	CTTGGATTTTGGTATCTGTTGG	6		CRL1684_TRAC_Tcell_19bp.bam	None	None	None_None_chr1:63954821-63954843_14	CAGGGTTCTGGATATCTGTNGG	none
chr1	64293572	64293594	chr1:64293572-64293594	8	-	0	GTGGGTTCTCTATAGCTGTTGG	5		CRL1684_TRAC_Tcell_19bp.bam	None	None	None_None_chr1:64293572-64293594_8	CAGGGTTCTGGATATCTGTNGG	none
chr1	69164231	69164253	chr1:69164231-69164253	22	-	0	ATGTTTTCTGGTTATCTATAGG	6		CRL1684_TRAC_Tcell_19bp.bam	None	None	None_None_chr1:69164231-69164253_22	CAGGGTTCTGGATATCTGTNGG	none
chr1	7030702	7030724	chr1:7030702-7030724	14	+	0	TATGGCTCAGAATATATGTTGG	6		CRL1684_TRAC_Tcell_19bp.bam	None	None	None_None_chr1:7030702-7030724_14	CAGGGTTCTGGATATCTGTNGG	none
chr1	70871145	70871166	chr1:70871145-70871166	6	+	0			CATGGTTCTGGC-ATCTGTTTG	CRL1684_TRAC_Tcell_19bp.bam	None	None	None_None_chr1:70871145-70871166_6	CAGGGTTCTGGATATCTGTNGG	CAGGGTTCTGGATATCTGTNGG
chr1	74914529	74914551	chr1:74914529-74914551	10	-	0	GATGATTTGGGATATCTGGTGG	6		CRL1684_TRAC_Tcell_19bp.bam	None	None	None_None_chr1:74914529-74914551_10	CAGGGTTCTGGATATCTGTNGG	none
chr1	77561876	77561898	chr1:77561876-77561898	26	-	0	GGTGGTTTTGGTTCTCTGTGGG	6		CRL1684_TRAC_Tcell_19bp.bam	None	None	None_None_chr1:77561876-77561898_26	CAGGGTTCTGGATATCTGTNGG	none
chr1	80128221	80128243	chr1:80128221-80128243	10	-	0	AATGATTTAGGATATCTGGTGG	6		CRL1684_TRAC_Tcell_19bp.bam	None	None	None_None_chr1:80128221-80128243_10	CAGGGTTCTGGATATCTGTNGG	none
chr1	80461528	80461550	chr1:80461528-80461550	172	-	0	TGGGGTTCTAAATATATGTTGG	5		CRL1684_TRAC_Tcell_19bp.bam	None	None	None_None_chr1:80461528-80461550_172	CAGGGTTCTGGATATCTGTNGG	none
chr1	82455480	82455502	chr1:82455480-82455502	50	+	0	AATGTAGCAGGATATCTGTGGG	6		CRL1684_TRAC_Tcell_19bp.bam	None	None	None_None_chr1:82455480-82455502_50	CAGGGTTCTGGATATCTGTNGG	none
chr1	85405994	85406016	chr1:85405994-85406016	6	-	0	GTGGGTCCTGGATAAATGTCAG	6		CRL1684_TRAC_Tcell_19bp.bam	None	None	None_None_chr1:85405994-85406016_6	CAGGGTTCTGGATATCTGTNGG	none
chr1	8758054	8758076	chr1:8758054-8758076	12	-	0	TAGGATTCTGCATATACGTGGG	5		CRL1684_TRAC_Tcell_19bp.bam	None	None	None_None_chr1:8758054-8758076_12	CAGGGTTCTGGATATCTGTNGG	none
chr1	89151589	89151611	chr1:89151589-89151611	12	-	0	TAGTGGAGTGGATACCTGTTGG	6		CRL1684_TRAC_Tcell_19bp.bam	None	None	None_None_chr1:89151589-89151611_12	CAGGGTTCTGGATATCTGTNGG	none
chr1	89233732	89233754	chr1:89233732-89233754	10	+	0	GAGTTCTGTAGATATCTGTTGG	6		CRL1684_TRAC_Tcell_19bp.bam	None	None	None_None_chr1:89233732-89233754_10	CAGGGTTCTGGATATCTGTNGG	none
chr1	91347859	91347881	chr1:91347859-91347881	26	-	0	CATGTATATGTATATCTGTGGG	5		CRL1684_TRAC_Tcell_19bp.bam	None	None	None_None_chr1:91347859-91347881_26	CAGGGTTCTGGATATCTGTNGG	none
chr1	91477551	91477573	chr1:91477551-91477573	8	-	0	TTAGGATATGGATATCTCTGGG	6		CRL1684_TRAC_Tcell_19bp.bam	None	None	None_None_chr1:91477551-91477573_8	CAGGGTTCTGGATATCTGTNGG	none
chr1	93784251	93784273	chr1:93784251-93784273	52	-	0	ATCTATTCTGGATATCTGTTGC	6		CRL1684_TRAC_Tcell_19bp.bam	None	None	None_None_chr1:93784251-93784273_52	CAGGGTTCTGGATATCTGTNGG	none
chr1	93797897	93797919	chr1:93797897-93797919	6	-	0	CAGGGTTATAAATATGTATTGG	5		CRL1684_TRAC_Tcell_19bp.bam	None	None	None_None_chr1:93797897-93797919_6	CAGGGTTCTGGATATCTGTNGG	none
chr1	96821163	96821185	chr1:96821163-96821185	8	+	0	CAGGGTTGGGAATATCTAGTGG	5		CRL1684_TRAC_Tcell_19bp.bam	None	None	None_None_chr1:96821163-96821185_8	CAGGGTTCTGGATATCTGTNGG	none
chr1	97056304	97056326	chr1:97056304-97056326	14	+	0	GATAATTCAGGATATCTGGTGG	6		CRL1684_TRAC_Tcell_19bp.bam	None	None	None_None_chr1:97056304-97056326_14	CAGGGTTCTGGATATCTGTNGG	none
chr20	10508482	10508504	chr20:10508482-10508504	8	-	0	CAGGGAAATGTAAATCTGTGAG	6		CRL1684_TRAC_Tcell_19bp.bam	None	None	None_None_chr20:10508482-10508504_8	CAGGGTTCTGGATATCTGTNGG	none
chr20	11863831	11863853	chr20:11863831-11863853	8	-	0	GAGGTTCCTAGATAGCTTTAGG	6		CRL1684_TRAC_Tcell_19bp.bam	None	None	None_None_chr20:11863831-11863853_8	CAGGGTTCTGGATATCTGTNGG	none
chr20	12507796	12507818	chr20:12507796-12507818	46	+	0	AACATCTCTGGATATCTGTGGG	5		CRL1684_TRAC_Tcell_19bp.bam	None	None	None_None_chr20:12507796-12507818_46	CAGGGTTCTGGATATCTGTNGG	none
chr20	13577083	13577105	chr20:13577083-13577105	14	+	0	CAGGGTTATTGTTACCTAGGGG	6		CRL1684_TRAC_Tcell_19bp.bam	None	None	None_None_chr20:13577083-13577105_14	CAGGGTTCTGGATATCTGTNGG	none
chr20	14656021	14656043	chr20:14656021-14656043	12	+	0	CAAGGACCAGAATATCTGTGGG	5		CRL1684_TRAC_Tcell_19bp.bam	None	None	None_None_chr20:14656021-14656043_12	CAGGGTTCTGGATATCTGTNGG	none
chr20	1842889	1842911	chr20:1842889-1842911	6	+	0	ATCTGTCCTGGATATCTGCAGG	6		CRL1684_TRAC_Tcell_19bp.bam	None	None	None_None_chr20:1842889-1842911_6	CAGGGTTCTGGATATCTGTNGG	none
chr20	1879034	1879056	chr20:1879034-1879056	20	-	0	CAGGAAGGTGGATGTGTGTAGG	6		CRL1684_TRAC_Tcell_19bp.bam	None	None	None_None_chr20:1879034-1879056_20	CAGGGTTCTGGATATCTGTNGG	none
chr20	19043680	19043702	chr20:19043680-19043702	8	-	0	AATGGAACTGGATATCTATGAG	6		CRL1684_TRAC_Tcell_19bp.bam	None	None	None_None_chr20:19043680-19043702_8	CAGGGTTCTGGATATCTGTNGG	none
chr20	23976293	23976315	chr20:23976293-23976315	28	+	0	CAGGTATCTGGATCTGTTGGGG	6		CRL1684_TRAC_Tcell_19bp.bam	None	None	None_None_chr20:23976293-23976315_28	CAGGGTTCTGGATATCTGTNGG	none
chr20	24956213	24956235	chr20:24956213-24956235	310	-	0	CTGGGTCCTGGATGTCTGTGGG	3		CRL1684_TRAC_Tcell_19bp.bam	None	None	None_None_chr20:24956213-24956235_310	CAGGGTTCTGGATATCTGTNGG	none
chr20	29783719	29783741	chr20:29783719-29783741	20	-	0	TGGGGCTAGGGGTATCTGTGGG	6		CRL1684_TRAC_Tcell_19bp.bam	None	None	None_None_chr20:29783719-29783741_20	CAGGGTTCTGGATATCTGTNGG	none
chr20	30872316	30872338	chr20:30872316-30872338	6	+	0	TGGGGCTAGGGCTATCTGTGGG	6		CRL1684_TRAC_Tcell_19bp.bam	None	None	None_None_chr20:30872316-30872338_6	CAGGGTTCTGGATATCTGTNGG	none
chr20	31961307	31961329	chr20:31961307-31961329	18	-	0	CACCACTTTGGATATCTGTAGA	6		CRL1684_TRAC_Tcell_19bp.bam	None	None	None_None_chr20:31961307-31961329_18	CAGGGTTCTGGATATCTGTNGG	none
chr20	32786633	32786655	chr20:32786633-32786655	10	-	0	CAGGGGTCTGGGCATCTGGGGA	5	CAGGGGTCTGGGCATCTG-GGG	CRL1684_TRAC_Tcell_19bp.bam	None	None	None_None_chr20:32786633-32786655_10	CAGGGTTCTGGATATCTGTNGG	CAGGGTTCTGGATATCTGTNGG
chr20	32791382	32791404	chr20:32791382-32791404	794	+	0	CAAGGTTCTGGATATCTGTGTG	2		CRL1684_TRAC_Tcell_19bp.bam	None	None	None_None_chr20:32791382-32791404_794	CAGGGTTCTGGATATCTGTNGG	none
chr20	33537793	33537815	chr20:33537793-33537815	18	+	0	CAGTTGTTTATATATCTGTGGG	6		CRL1684_TRAC_Tcell_19bp.bam	None	None	None_None_chr20:33537793-33537815_18	CAGGGTTCTGGATATCTGTNGG	none
chr20	33758271	33758293	chr20:33758271-33758293	8	+	0	CAGCCTTGTGGGTATCTGTGGG	4		CRL1684_TRAC_Tcell_19bp.bam	None	None	None_None_chr20:33758271-33758293_8	CAGGGTTCTGGATATCTGTNGG	none
chr20	34537520	34537542	chr20:34537520-34537542	8	+	0	CGGGGTCAGGGATGTCTGTGGG	5		CRL1684_TRAC_Tcell_19bp.bam	None	None	None_None_chr20:34537520-34537542_8	CAGGGTTCTGGATATCTGTNGG	none
chr20	35240081	35240103	chr20:35240081-35240103	74	+	0	TAGGGCTCTGGATACTTGTAGG	4		CRL1684_TRAC_Tcell_19bp.bam	None	None	None_None_chr20:35240081-35240103_74	CAGGGTTCTGGATATCTGTNGG	none
chr20	35648471	35648493	chr20:35648471-35648493	22	+	0	AGCCATTTTGGATATCTGTAGG	6		CRL1684_TRAC_Tcell_19bp.bam	None	None	None_None_chr20:35648471-35648493_22	CAGGGTTCTGGATATCTGTNGG	none
chr20	39707278	39707300	chr20:39707278-39707300	20	+	0	CCTAGTAGGGGATATCTGTGGG	6		CRL1684_TRAC_Tcell_19bp.bam	None	None	None_None_chr20:39707278-39707300_20	CAGGGTTCTGGATATCTGTNGG	none
chr20	42337136	42337158	chr20:42337136-42337158	10	-	0	GGGGCTTCTAAATATCTGTAAG	6		CRL1684_TRAC_Tcell_19bp.bam	None	None	None_None_chr20:42337136-42337158_10	CAGGGTTCTGGATATCTGTNGG	none
chr20	42467445	42467467	chr20:42467445-42467467	8	-	0	CAGGGTTCCGTATATCTTTGGC	4	CAGGGTTCCGTATATCT-TTGG	CRL1684_TRAC_Tcell_19bp.bam	None	None	None_None_chr20:42467445-42467467_8	CAGGGTTCTGGATATCTGTNGG	CAGGGTTCTGGATATCTGTNGG
chr20	4320769	4320791	chr20:4320769-4320791	10	+	0	CAGAGTTAGGGAAATCTGTTGG	4		CRL1684_TRAC_Tcell_19bp.bam	None	None	None_None_chr20:4320769-4320791_10	CAGGGTTCTGGATATCTGTNGG	none
chr20	44161863	44161885	chr20:44161863-44161885	16	-	0	AGGGGTTGGGGATATATTTGGG	6		CRL1684_TRAC_Tcell_19bp.bam	None	None	None_None_chr20:44161863-44161885_16	CAGGGTTCTGGATATCTGTNGG	none
chr20	47201435	47201457	chr20:47201435-47201457	52	+	0	CCAGGCTTAGGCTATCTGTGGG	6	CAGGCTTA-GGCTATCTGTGGG	CRL1684_TRAC_Tcell_19bp.bam	None	None	None_None_chr20:47201435-47201457_52	CAGGGTTCTGGATATCTGTNGG	CAGGGTTCTGGATATCTGTNGG
chr20	47400503	47400525	chr20:47400503-47400525	44	-	0	CAGGACTCTGGATATATTTCGG	4		CRL1684_TRAC_Tcell_19bp.bam	None	None	None_None_chr20:47400503-47400525_44	CAGGGTTCTGGATATCTGTNGG	none
chr20	47630868	47630890	chr20:47630868-47630890	14	+	0	TGGGATTTGGCATATCTGTTGG	6		CRL1684_TRAC_Tcell_19bp.bam	None	None	None_None_chr20:47630868-47630890_14	CAGGGTTCTGGATATCTGTNGG	none
chr20	48449646	48449668	chr20:48449646-48449668	12	+	0	CAGGCAGTGGGCTATCTGTGGG	6		CRL1684_TRAC_Tcell_19bp.bam	None	None	None_None_chr20:48449646-48449668_12	CAGGGTTCTGGATATCTGTNGG	none
chr20	48852213	48852235	chr20:48852213-48852235	6	+	0	AAAGGTTAAGGATATATTTAGG	6		CRL1684_TRAC_Tcell_19bp.bam	None	None	None_None_chr20:48852213-48852235_6	CAGGGTTCTGGATATCTGTNGG	none
chr20	53179716	53179738	chr20:53179716-53179738	20	+	0	CTGCTTCCTGGATATCTGTAGA	5		CRL1684_TRAC_Tcell_19bp.bam	None	None	None_None_chr20:53179716-53179738_20	CAGGGTTCTGGATATCTGTNGG	none
chr20	54261829	54261851	chr20:54261829-54261851	6	-	0	CAGGGTTCAAGGCATCTATGGG	5		CRL1684_TRAC_Tcell_19bp.bam	None	None	None_None_chr20:54261829-54261851_6	CAGGGTTCTGGATATCTGTNGG	none
chr20	5600253	5600275	chr20:5600253-5600275	6	+	0	CAGGGCTCTAAATACATGTGGG	5		CRL1684_TRAC_Tcell_19bp.bam	None	None	None_None_chr20:5600253-5600275_6	CAGGGTTCTGGATATCTGTNGG	none
chr20	56233693	56233714	chr20:56233693-56233714	16	-	0			AAGAGTTCTAGATAT-TGTGGG	CRL1684_TRAC_Tcell_19bp.bam	None	None	None_None_chr20:56233693-56233714_16	CAGGGTTCTGGATATCTGTNGG	CAGGGTTCTGGATATCTGTNGG
chr20	56510114	56510136	chr20:56510114-56510136	10	+	0	GTGGGTATGGGATTTCTGTTGG	6		CRL1684_TRAC_Tcell_19bp.bam	None	None	None_None_chr20:56510114-56510136_10	CAGGGTTCTGGATATCTGTNGG	none
chr20	6991097	6991119	chr20:6991097-6991119	20	+	0	GACAGACCTGGATATATGTGGG	6		CRL1684_TRAC_Tcell_19bp.bam	None	None	None_None_chr20:6991097-6991119_20	CAGGGTTCTGGATATCTGTNGG	none
chr20	732504	732526	chr20:732504-732526	20	+	0	CAGAGTCCTGGAGATGTGTGGG	4		CRL1684_TRAC_Tcell_19bp.bam	None	None	None_None_chr20:732504-732526_20	CAGGGTTCTGGATATCTGTNGG	none
chr21	21008456	21008478	chr21:21008456-21008478	12	-	0	TACCTTTCAGGATAACTGTGGG	6		CRL1684_TRAC_Tcell_19bp.bam	None	None	None_None_chr21:21008456-21008478_12	CAGGGTTCTGGATATCTGTNGG	none
chr21	24717067	24717089	chr21:24717067-24717089	10	-	0	TAGTGTTATGGATATCTGGTGG	4		CRL1684_TRAC_Tcell_19bp.bam	None	None	None_None_chr21:24717067-24717089_10	CAGGGTTCTGGATATCTGTNGG	none
chr21	26280777	26280799	chr21:26280777-26280799	50	+	0	TGGGGTACTGGACATCTGTGAG	5		CRL1684_TRAC_Tcell_19bp.bam	None	None	None_None_chr21:26280777-26280799_50	CAGGGTTCTGGATATCTGTNGG	none
chr21	29072542	29072564	chr21:29072542-29072564	8	-	0	CAGGGTTCAAGGTAAATGTTGG	5		CRL1684_TRAC_Tcell_19bp.bam	None	None	None_None_chr21:29072542-29072564_8	CAGGGTTCTGGATATCTGTNGG	none
chr21	31107615	31107637	chr21:31107615-31107637	16	-	0	GATGATTTAGGATATCTGGCGG	6		CRL1684_TRAC_Tcell_19bp.bam	None	None	None_None_chr21:31107615-31107637_16	CAGGGTTCTGGATATCTGTNGG	none
chr21	33111657	33111679	chr21:33111657-33111679	18	+	0	GAACTATCTGGATAACTGTCGG	6		CRL1684_TRAC_Tcell_19bp.bam	None	None	None_None_chr21:33111657-33111679_18	CAGGGTTCTGGATATCTGTNGG	none
chr21	35877336	35877358	chr21:35877336-35877358	6	+	0	CAGAAGTTGGGGTATCTGTGGG	6		CRL1684_TRAC_Tcell_19bp.bam	None	None	None_None_chr21:35877336-35877358_6	CAGGGTTCTGGATATCTGTNGG	none
chr21	36413148	36413170	chr21:36413148-36413170	10	-	0	GAGGGTCCCTGATGACTGTTGG	6		CRL1684_TRAC_Tcell_19bp.bam	None	None	None_None_chr21:36413148-36413170_10	CAGGGTTCTGGATATCTGTNGG	none
chr21	38525687	38525709	chr21:38525687-38525709	30	+	0	GAGGCACCTGCATATCTGTGGG	5		CRL1684_TRAC_Tcell_19bp.bam	None	None	None_None_chr21:38525687-38525709_30	CAGGGTTCTGGATATCTGTNGG	none
chr21	38871579	38871601	chr21:38871579-38871601	18	+	0	TAAAATGCTTGATATCTGTTGG	6		CRL1684_TRAC_Tcell_19bp.bam	None	None	None_None_chr21:38871579-38871601_18	CAGGGTTCTGGATATCTGTNGG	none
chr21	41569377	41569399	chr21:41569377-41569399	50	-	0	TTTGGATATGGATATCTGTGTG	6		CRL1684_TRAC_Tcell_19bp.bam	None	None	None_None_chr21:41569377-41569399_50	CAGGGTTCTGGATATCTGTNGG	none
chr21	41988722	41988744	chr21:41988722-41988744	6	-	0	ATAGGTTCTGCATATCTGTTAG	5	CATAGGTTCTGCATATCTGTTAG	CRL1684_TRAC_Tcell_19bp.bam	None	None	None_None_chr21:41988722-41988744_6	CAGGGTTCTGGATATCTGTNGG	CAG-GGTTCTGGATATCTGTNGG
chr21	42682642	42682664	chr21:42682642-42682664	20	-	0	CAGGGTTTTGGAATATCGTGGG	6		CRL1684_TRAC_Tcell_19bp.bam	None	None	None_None_chr21:42682642-42682664_20	CAGGGTTCTGGATATCTGTNGG	none
chr21	43884802	43884824	chr21:43884802-43884824	16	+	0	CAGAGGCAGGGCTATCTGTGGG	6		CRL1684_TRAC_Tcell_19bp.bam	None	None	None_None_chr21:43884802-43884824_16	CAGGGTTCTGGATATCTGTNGG	none
chr21	44479572	44479594	chr21:44479572-44479594	18	+	0	TAGGCCTCCGGATAACTGTGGG	5		CRL1684_TRAC_Tcell_19bp.bam	None	None	None_None_chr21:44479572-44479594_18	CAGGGTTCTGGATATCTGTNGG	none
chr21	46225530	46225552	chr21:46225530-46225552	6	-	0	TAGGCCTCCGGATAACTGCGGG	6		CRL1684_TRAC_Tcell_19bp.bam	None	None	None_None_chr21:46225530-46225552_6	CAGGGTTCTGGATATCTGTNGG	none
chr22	11457391	11457413	chr22:11457391-11457413	16	+	0	CAGTGTTCTGGAATCCTTTGTG	6		CRL1684_TRAC_Tcell_19bp.bam	None	None	None_None_chr22:11457391-11457413_16	CAGGGTTCTGGATATCTGTNGG	none
chr22	16226469	16226491	chr22:16226469-16226491	8	+	0	CAGTGTTCTGGAATCCTATGTG	6		CRL1684_TRAC_Tcell_19bp.bam	None	None	None_None_chr22:16226469-16226491_8	CAGGGTTCTGGATATCTGTNGG	none
chr22	22789770	22789792	chr22:22789770-22789792	38	+	0	CTGGGCTCTGGATTTCCATTGG	5		CRL1684_TRAC_Tcell_19bp.bam	None	None	None_None_chr22:22789770-22789792_38	CAGGGTTCTGGATATCTGTNGG	none
chr22	25625635	25625657	chr22:25625635-25625657	10	-	0	TAGGCCTCCGGATAACTGTGGG	5		CRL1684_TRAC_Tcell_19bp.bam	None	None	None_None_chr22:25625635-25625657_10	CAGGGTTCTGGATATCTGTNGG	none
chr22	30941909	30941931	chr22:30941909-30941931	34	+	0	CTGCCATCTGGATATCTCTTGG	5		CRL1684_TRAC_Tcell_19bp.bam	None	None	None_None_chr22:30941909-30941931_34	CAGGGTTCTGGATATCTGTNGG	none
chr22	34606744	34606766	chr22:34606744-34606766	10	+	0	CCAGGTTCATGGTAACTGTTGG	6		CRL1684_TRAC_Tcell_19bp.bam	None	None	None_None_chr22:34606744-34606766_10	CAGGGTTCTGGATATCTGTNGG	none
chr22	35008398	35008420	chr22:35008398-35008420	8	-	0	CAGGGAACTGAAACTCTCTTGG	6		CRL1684_TRAC_Tcell_19bp.bam	None	None	None_None_chr22:35008398-35008420_8	CAGGGTTCTGGATATCTGTNGG	none
chr22	35872656	35872677	chr22:35872656-35872677	42	+	0			CAGGGTGCTG-ACGTCTGTCGG	CRL1684_TRAC_Tcell_19bp.bam	None	None	None_None_chr22:35872656-35872677_42	CAGGGTTCTGGATATCTGTNGG	CAGGGTTCTGGATATCTGTNGG
chr22	36716114	36716136	chr22:36716114-36716136	8	+	0	CAATGTTGTGAATATCTGTTGC	5		CRL1684_TRAC_Tcell_19bp.bam	None	None	None_None_chr22:36716114-36716136_8	CAGGGTTCTGGATATCTGTNGG	none
chr22	37344332	37344354	chr22:37344332-37344354	10	-	0	GAGTGTAGGAGATATCTGTGGG	6		CRL1684_TRAC_Tcell_19bp.bam	None	None	None_None_chr22:37344332-37344354_10	CAGGGTTCTGGATATCTGTNGG	none
chr22	38699747	38699769	chr22:38699747-38699769	18	-	0	GATATTTCTGGATTTCTGTGGG	5		CRL1684_TRAC_Tcell_19bp.bam	None	None	None_None_chr22:38699747-38699769_18	CAGGGTTCTGGATATCTGTNGG	none
chr22	39384031	39384053	chr22:39384031-39384053	50	+	0	ATGGGGGCAGGTTATCTGTTGG	6		CRL1684_TRAC_Tcell_19bp.bam	None	None	None_None_chr22:39384031-39384053_50	CAGGGTTCTGGATATCTGTNGG	none
chr22	41608513	41608535	chr22:41608513-41608535	14	+	0	CAGGGATGGACATTTCTGTGGG	6		CRL1684_TRAC_Tcell_19bp.bam	None	None	None_None_chr22:41608513-41608535_14	CAGGGTTCTGGATATCTGTNGG	none
chr22	41920823	41920845	chr22:41920823-41920845	8	+	0	CAGGGCCCTGGGGACCTGGTGG	6		CRL1684_TRAC_Tcell_19bp.bam	None	None	None_None_chr22:41920823-41920845_8	CAGGGTTCTGGATATCTGTNGG	none
chr22	42170942	42170964	chr22:42170942-42170964	12	-	0	GAGGCTTCTGTGTCTCCGTGGG	6		CRL1684_TRAC_Tcell_19bp.bam	None	None	None_None_chr22:42170942-42170964_12	CAGGGTTCTGGATATCTGTNGG	none
chr22	42551998	42552020	chr22:42551998-42552020	8	+	0	TAGGCCTCCGGATAACTGTGGG	5		CRL1684_TRAC_Tcell_19bp.bam	None	None	None_None_chr22:42551998-42552020_8	CAGGGTTCTGGATATCTGTNGG	none
chr22	43449259	43449281	chr22:43449259-43449281	6	-	0	CAGGGCCCAGGATATCTGTTGC	4		CRL1684_TRAC_Tcell_19bp.bam	None	None	None_None_chr22:43449259-43449281_6	CAGGGTTCTGGATATCTGTNGG	none
chr22	44124510	44124532	chr22:44124510-44124532	40	-	0	CAGGATGGGGCATATCTGTGGG	5		CRL1684_TRAC_Tcell_19bp.bam	None	None	None_None_chr22:44124510-44124532_40	CAGGGTTCTGGATATCTGTNGG	none
chr22	45784601	45784623	chr22:45784601-45784623	10	+	0	CAGGAGGCTGGCTTCCTGTGGG	6		CRL1684_TRAC_Tcell_19bp.bam	None	None	None_None_chr22:45784601-45784623_10	CAGGGTTCTGGATATCTGTNGG	none
chr22	48326434	48326456	chr22:48326434-48326456	30	-	0	CAGATGCATGAATATCTGTGGG	6		CRL1684_TRAC_Tcell_19bp.bam	None	None	None_None_chr22:48326434-48326456_30	CAGGGTTCTGGATATCTGTNGG	none
chr2	10121838	10121860	chr2:10121838-10121860	10	+	0	CAGGAGACAGGATTTCTGTGGA	6		CRL1684_TRAC_Tcell_19bp.bam	None	None	None_None_chr2:10121838-10121860_10	CAGGGTTCTGGATATCTGTNGG	none
chr2	105366657	105366679	chr2:105366657-105366679	42	-	0	AAGGGAACTGCATATCTGTAGG	4		CRL1684_TRAC_Tcell_19bp.bam	None	None	None_None_chr2:105366657-105366679_42	CAGGGTTCTGGATATCTGTNGG	none
chr2	106670690	106670712	chr2:106670690-106670712	36	+	0	GATGATTTAGGGTATCTGTTGG	6		CRL1684_TRAC_Tcell_19bp.bam	None	None	None_None_chr2:106670690-106670712_36	CAGGGTTCTGGATATCTGTNGG	none
chr2	110154718	110154740	chr2:110154718-110154740	46	+	0	GATGATTTAGGGTATCTGTTGG	6		CRL1684_TRAC_Tcell_19bp.bam	None	None	None_None_chr2:110154718-110154740_46	CAGGGTTCTGGATATCTGTNGG	none
chr2	112828342	112828364	chr2:112828342-112828364	10	+	0	ATGGGTTATGTCCATCTGTGGG	6		CRL1684_TRAC_Tcell_19bp.bam	None	None	None_None_chr2:112828342-112828364_10	CAGGGTTCTGGATATCTGTNGG	none
chr2	113212093	113212115	chr2:113212093-113212115	34	+	0	CAGGGGGATGGATATATGTGGG	4		CRL1684_TRAC_Tcell_19bp.bam	None	None	None_None_chr2:113212093-113212115_34	CAGGGTTCTGGATATCTGTNGG	none
chr2	117224813	117224835	chr2:117224813-117224835	12	+	0	CTGGATGCTAGTTATTTGTCGG	6		CRL1684_TRAC_Tcell_19bp.bam	None	None	None_None_chr2:117224813-117224835_12	CAGGGTTCTGGATATCTGTNGG	none
chr2	118134103	118134125	chr2:118134103-118134125	8	+	0	TAGGATTCTGAAAAGCTGTGAG	6		CRL1684_TRAC_Tcell_19bp.bam	None	None	None_None_chr2:118134103-118134125_8	CAGGGTTCTGGATATCTGTNGG	none
chr2	119663727	119663749	chr2:119663727-119663749	10	-	0	CTTGCTTCTTGCTATCTCTTGG	6		CRL1684_TRAC_Tcell_19bp.bam	None	None	None_None_chr2:119663727-119663749_10	CAGGGTTCTGGATATCTGTNGG	none
chr2	120661167	120661189	chr2:120661167-120661189	6	-	0	ATGGAATCTGCATATCTTTTGG	6		CRL1684_TRAC_Tcell_19bp.bam	None	None	None_None_chr2:120661167-120661189_6	CAGGGTTCTGGATATCTGTNGG	none
chr2	120984501	120984523	chr2:120984501-120984523	42	-	0	CTGGGGTCTGTGTATCTCTTGG	5		CRL1684_TRAC_Tcell_19bp.bam	None	None	None_None_chr2:120984501-120984523_42	CAGGGTTCTGGATATCTGTNGG	none
chr2	124204191	124204213	chr2:124204191-124204213	38	-	0	CCCTGTCCTAGATATCTGTGGA	6		CRL1684_TRAC_Tcell_19bp.bam	None	None	None_None_chr2:124204191-124204213_38	CAGGGTTCTGGATATCTGTNGG	none
chr2	12589979	12590001	chr2:12589979-12590001	10	+	0	AAGGGGCCAGGGTTTCTGTGGG	6		CRL1684_TRAC_Tcell_19bp.bam	None	None	None_None_chr2:12589979-12590001_10	CAGGGTTCTGGATATCTGTNGG	none
chr2	128638257	128638279	chr2:128638257-128638279	26	-	0	CTAGGATGTGGATATCTTTGGG	5		CRL1684_TRAC_Tcell_19bp.bam	None	None	None_None_chr2:128638257-128638279_26	CAGGGTTCTGGATATCTGTNGG	none
chr2	135081549	135081571	chr2:135081549-135081571	10	+	0	CAGCAGACCAGATATCTGTTGG	6		CRL1684_TRAC_Tcell_19bp.bam	None	None	None_None_chr2:135081549-135081571_10	CAGGGTTCTGGATATCTGTNGG	none
chr2	136804687	136804709	chr2:136804687-136804709	14	-	0	GGAGGTCCAGGTTATCTGTAGG	6		CRL1684_TRAC_Tcell_19bp.bam	None	None	None_None_chr2:136804687-136804709_14	CAGGGTTCTGGATATCTGTNGG	none
chr2	1408142	1408164	chr2:1408142-1408164	46	-	0	GAGGATCCTGAATATCTGTGTG	5		CRL1684_TRAC_Tcell_19bp.bam	None	None	None_None_chr2:1408142-1408164_46	CAGGGTTCTGGATATCTGTNGG	none
chr2	141175042	141175064	chr2:141175042-141175064	8	+	0	GATGATTTAGGATATCTGGTGG	6		CRL1684_TRAC_Tcell_19bp.bam	None	None	None_None_chr2:141175042-141175064_8	CAGGGTTCTGGATATCTGTNGG	none
chr2	144174168	144174190	chr2:144174168-144174190	14	-	0	GAGAATTCTGGATGTCTGTAGA	5		CRL1684_TRAC_Tcell_19bp.bam	None	None	None_None_chr2:144174168-144174190_14	CAGGGTTCTGGATATCTGTNGG	none
chr2	1486176	1486198	chr2:1486176-1486198	14	+	0	CAAGGTTTTTAATATCTGTGGG	4		CRL1684_TRAC_Tcell_19bp.bam	None	None	None_None_chr2:1486176-1486198_14	CAGGGTTCTGGATATCTGTNGG	none
chr2	151201404	151201426	chr2:151201404-151201426	6	-	0	GAGCATTTAGGATACCTGTAGG	6		CRL1684_TRAC_Tcell_19bp.bam	None	None	None_None_chr2:151201404-151201426_6	CAGGGTTCTGGATATCTGTNGG	none
chr2	151397802	151397824	chr2:151397802-151397824	10	+	0	CATGAATGTGTATATCTGTAGG	5		CRL1684_TRAC_Tcell_19bp.bam	None	None	None_None_chr2:151397802-151397824_10	CAGGGTTCTGGATATCTGTNGG	none
chr2	152542519	152542541	chr2:152542519-152542541	8	+	0	GAGAGTTCTGCATTTCTCTGAG	6		CRL1684_TRAC_Tcell_19bp.bam	None	None	None_None_chr2:152542519-152542541_8	CAGGGTTCTGGATATCTGTNGG	none
chr2	156121120	156121142	chr2:156121120-156121142	30	+	0	CACTGCCCTAGATATCTGTGGA	6		CRL1684_TRAC_Tcell_19bp.bam	None	None	None_None_chr2:156121120-156121142_30	CAGGGTTCTGGATATCTGTNGG	none
chr2	157793315	157793337	chr2:157793315-157793337	44	-	0	GAGGGGTATGGATAGCAGTAGG	5		CRL1684_TRAC_Tcell_19bp.bam	None	None	None_None_chr2:157793315-157793337_44	CAGGGTTCTGGATATCTGTNGG	none
chr2	157899332	157899354	chr2:157899332-157899354	6	-	0	CAGCTGCCTGCACATCTGTAGG	6		CRL1684_TRAC_Tcell_19bp.bam	None	None	None_None_chr2:157899332-157899354_6	CAGGGTTCTGGATATCTGTNGG	none
chr2	160735875	160735896	chr2:160735875-160735896	18	-	0			AAGGATTCTGG-TATCTCTGGG	CRL1684_TRAC_Tcell_19bp.bam	None	None	None_None_chr2:160735875-160735896_18	CAGGGTTCTGGATATCTGTNGG	CAGGGTTCTGGATATCTGTNGG
chr2	16704953	16704975	chr2:16704953-16704975	16	-	0	CTGAGGTTTAAATATCTGTGGG	6		CRL1684_TRAC_Tcell_19bp.bam	None	None	None_None_chr2:16704953-16704975_16	CAGGGTTCTGGATATCTGTNGG	none
chr2	167368462	167368484	chr2:167368462-167368484	6	+	0	CCTGGGTCTGGCTATCTAGAGG	6		CRL1684_TRAC_Tcell_19bp.bam	None	None	None_None_chr2:167368462-167368484_6	CAGGGTTCTGGATATCTGTNGG	none
chr2	169156390	169156412	chr2:169156390-169156412	50	+	0	CACATTCATTGATATCTGTAGG	6		CRL1684_TRAC_Tcell_19bp.bam	None	None	None_None_chr2:169156390-169156412_50	CAGGGTTCTGGATATCTGTNGG	none
chr2	171091176	171091198	chr2:171091176-171091198	28	-	0	CAGGTAACTAAATATCTGTAGG	5		CRL1684_TRAC_Tcell_19bp.bam	None	None	None_None_chr2:171091176-171091198_28	CAGGGTTCTGGATATCTGTNGG	none
chr2	175733717	175733739	chr2:175733717-175733739	408	-	0	GAGGGATCTGGATATCTTGGGT	5	GAGGGATCTGGATATCT-TGGG	CRL1684_TRAC_Tcell_19bp.bam	None	None	None_None_chr2:175733717-175733739_408	CAGGGTTCTGGATATCTGTNGG	CAGGGTTCTGGATATCTGTNGG
chr2	176627332	176627354	chr2:176627332-176627354	14	+	0	TAGGGTCCAGGTTCTCTGCTGG	6		CRL1684_TRAC_Tcell_19bp.bam	None	None	None_None_chr2:176627332-176627354_14	CAGGGTTCTGGATATCTGTNGG	none
chr2	177045210	177045233	chr2:177045210-177045233	10	+	0			CAGAGCTCTAGGATCTCTGTGGG	CRL1684_TRAC_Tcell_19bp.bam	None	None	None_None_chr2:177045210-177045233_10	CAGGGTTCTGGATATCTGTNGG	CAGGGTTCT-GGATATCTGTNGG
chr2	178315502	178315525	chr2:178315502-178315525	270	-	0			CTGGGTTCTGAATCATCTGTGGG	CRL1684_TRAC_Tcell_19bp.bam	None	None	None_None_chr2:178315502-178315525_270	CAGGGTTCTGGATATCTGTNGG	CAGGGTTCTGGAT-ATCTGTNGG
chr2	181753902	181753924	chr2:181753902-181753924	14	+	0	CTGGGTGTTGAGTAACTGTAGG	6		CRL1684_TRAC_Tcell_19bp.bam	None	None	None_None_chr2:181753902-181753924_14	CAGGGTTCTGGATATCTGTNGG	none
chr2	184467037	184467059	chr2:184467037-184467059	12	-	0	CATTTCTCTGGAAATTTGTTGG	6		CRL1684_TRAC_Tcell_19bp.bam	None	None	None_None_chr2:184467037-184467059_12	CAGGGTTCTGGATATCTGTNGG	none
chr2	186765614	186765636	chr2:186765614-186765636	8	+	0	TAGGGTTTTAGAGATCTGTGGG	4		CRL1684_TRAC_Tcell_19bp.bam	None	None	None_None_chr2:186765614-186765636_8	CAGGGTTCTGGATATCTGTNGG	none
chr2	190709531	190709553	chr2:190709531-190709553	22	+	0	AGCAGTGTTGGATATCTGTTGG	6		CRL1684_TRAC_Tcell_19bp.bam	None	None	None_None_chr2:190709531-190709553_22	CAGGGTTCTGGATATCTGTNGG	none
chr2	195678103	195678125	chr2:195678103-195678125	10	+	0	CATGTACATGGATTTCTGTTGG	6		CRL1684_TRAC_Tcell_19bp.bam	None	None	None_None_chr2:195678103-195678125_10	CAGGGTTCTGGATATCTGTNGG	none
chr2	196622720	196622742	chr2:196622720-196622742	6	+	0	TTAGGATATGGATATCTTTGGG	6		CRL1684_TRAC_Tcell_19bp.bam	None	None	None_None_chr2:196622720-196622742_6	CAGGGTTCTGGATATCTGTNGG	none
chr2	201403760	201403782	chr2:201403760-201403782	16	-	0	AAGGTTCCTGGGTTTTTGTGGG	6		CRL1684_TRAC_Tcell_19bp.bam	None	None	None_None_chr2:201403760-201403782_16	CAGGGTTCTGGATATCTGTNGG	none
chr2	204652354	204652376	chr2:204652354-204652376	14	-	0	GATGATTGAGGATATCTGGTGG	6		CRL1684_TRAC_Tcell_19bp.bam	None	None	None_None_chr2:204652354-204652376_14	CAGGGTTCTGGATATCTGTNGG	none
chr2	209049073	209049095	chr2:209049073-209049095	44	+	0	AAGAGTTCTGCATATCTGAAGG	4		CRL1684_TRAC_Tcell_19bp.bam	None	None	None_None_chr2:209049073-209049095_44	CAGGGTTCTGGATATCTGTNGG	none
chr2	210599263	210599285	chr2:210599263-210599285	30	-	0	AAGCTTTTAGGTTATCTGTGGG	6		CRL1684_TRAC_Tcell_19bp.bam	None	None	None_None_chr2:210599263-210599285_30	CAGGGTTCTGGATATCTGTNGG	none
chr2	214818362	214818384	chr2:214818362-214818384	18	+	0	AACGATCATGGATATCTGTGGG	5		CRL1684_TRAC_Tcell_19bp.bam	None	None	None_None_chr2:214818362-214818384_18	CAGGGTTCTGGATATCTGTNGG	none
chr2	217291117	217291139	chr2:217291117-217291139	284	-	0	ATAGGTTCTGGATATCTGTGGC	4	TAGG-TTCTGGATATCTGTGGC	CRL1684_TRAC_Tcell_19bp.bam	None	None	None_None_chr2:217291117-217291139_284	CAGGGTTCTGGATATCTGTNGG	CAGGGTTCTGGATATCTGTNGG
chr2	219428919	219428941	chr2:219428919-219428941	6	+	0	AGGGGGTGTGTATATCTGTGAG	6		CRL1684_TRAC_Tcell_19bp.bam	None	None	None_None_chr2:219428919-219428941_6	CAGGGTTCTGGATATCTGTNGG	none
chr2	220483704	220483726	chr2:220483704-220483726	68	+	0	CAAGGTCCTGGATTTCTGTGAG	4		CRL1684_TRAC_Tcell_19bp.bam	None	None	None_None_chr2:220483704-220483726_68	CAGGGTTCTGGATATCTGTNGG	none
chr2	225701281	225701303	chr2:225701281-225701303	48	-	0	TAGTGTTCTGGCTATCTGTAGG	3		CRL1684_TRAC_Tcell_19bp.bam	None	None	None_None_chr2:225701281-225701303_48	CAGGGTTCTGGATATCTGTNGG	none
chr2	231387236	231387258	chr2:231387236-231387258	50	+	0	CAAGGGTATGGATATCTTTGGG	4		CRL1684_TRAC_Tcell_19bp.bam	None	None	None_None_chr2:231387236-231387258_50	CAGGGTTCTGGATATCTGTNGG	none
chr2	237961997	237962019	chr2:237961997-237962019	12	-	0	CAGGGACCTGGGAACCTGTGGG	5		CRL1684_TRAC_Tcell_19bp.bam	None	None	None_None_chr2:237961997-237962019_12	CAGGGTTCTGGATATCTGTNGG	none
chr2	241201027	241201049	chr2:241201027-241201049	20	+	0	AGGGGTTCTGGGTATCTGGGGG	4		CRL1684_TRAC_Tcell_19bp.bam	None	None	None_None_chr2:241201027-241201049_20	CAGGGTTCTGGATATCTGTNGG	none
chr2	24896781	24896802	chr2:24896781-24896802	12	-	0			AAGGTTTCTAGA-ATCTGTGGG	CRL1684_TRAC_Tcell_19bp.bam	None	None	None_None_chr2:24896781-24896802_12	CAGGGTTCTGGATATCTGTNGG	CAGGGTTCTGGATATCTGTNGG
chr2	25913610	25913632	chr2:25913610-25913632	16	+	0	CGGGGCCCTGGAGGTCTGTGGA	6		CRL1684_TRAC_Tcell_19bp.bam	None	None	None_None_chr2:25913610-25913632_16	CAGGGTTCTGGATATCTGTNGG	none
chr2	26743547	26743569	chr2:26743547-26743569	10	+	0	CAGGGGCAGGGGTATGTGTGGG	6		CRL1684_TRAC_Tcell_19bp.bam	None	None	None_None_chr2:26743547-26743569_10	CAGGGTTCTGGATATCTGTNGG	none
chr2	28507747	28507769	chr2:28507747-28507769	74	+	0	TATGATATTGGATATCTGTGGG	5		CRL1684_TRAC_Tcell_19bp.bam	None	None	None_None_chr2:28507747-28507769_74	CAGGGTTCTGGATATCTGTNGG	none
chr2	30196507	30196529	chr2:30196507-30196529	194	-	0	CTAGGACATGGATATCTGTGGG	5		CRL1684_TRAC_Tcell_19bp.bam	None	None	None_None_chr2:30196507-30196529_194	CAGGGTTCTGGATATCTGTNGG	none
chr2	33131103	33131125	chr2:33131103-33131125	14	+	0	GTGAGTCTTGGATCTCTGTGGG	6		CRL1684_TRAC_Tcell_19bp.bam	None	None	None_None_chr2:33131103-33131125_14	CAGGGTTCTGGATATCTGTNGG	none
chr2	34228965	34228986	chr2:34228965-34228986	12	+	0			CAGCCTTATG-ATATCTGTTGG	CRL1684_TRAC_Tcell_19bp.bam	None	None	None_None_chr2:34228965-34228986_12	CAGGGTTCTGGATATCTGTNGG	CAGGGTTCTGGATATCTGTNGG
chr2	36236816	36236838	chr2:36236816-36236838	12	+	0	CTGGTTGTTAGCTATCTGTAGG	6		CRL1684_TRAC_Tcell_19bp.bam	None	None	None_None_chr2:36236816-36236838_12	CAGGGTTCTGGATATCTGTNGG	none
chr2	36283009	36283031	chr2:36283009-36283031	12	-	0	GAGTATTAGAGATATCTGTGGG	6		CRL1684_TRAC_Tcell_19bp.bam	None	None	None_None_chr2:36283009-36283031_12	CAGGGTTCTGGATATCTGTNGG	none
chr2	3981434	3981456	chr2:3981434-3981456	24	-	0	TTGGGTCCTGAATATCTCTGAG	6		CRL1684_TRAC_Tcell_19bp.bam	None	None	None_None_chr2:3981434-3981456_24	CAGGGTTCTGGATATCTGTNGG	none
chr2	40432533	40432555	chr2:40432533-40432555	8	+	0	AAGTTTTGTGGATATCTGTAGG	4		CRL1684_TRAC_Tcell_19bp.bam	None	None	None_None_chr2:40432533-40432555_8	CAGGGTTCTGGATATCTGTNGG	none
chr2	42295820	42295842	chr2:42295820-42295842	56	+	0	CTGGTTCTGGGATATCTGTTAG	6		CRL1684_TRAC_Tcell_19bp.bam	None	None	None_None_chr2:42295820-42295842_56	CAGGGTTCTGGATATCTGTNGG	none
chr2	4482637	4482659	chr2:4482637-4482659	8	-	0	CAAAGTTCCACAAATCTGTAGG	6		CRL1684_TRAC_Tcell_19bp.bam	None	None	None_None_chr2:4482637-4482659_8	CAGGGTTCTGGATATCTGTNGG	none
chr2	47980472	47980493	chr2:47980472-47980493	54	+	0			GTGGGTTCTGGAT-TCTGTAAG	CRL1684_TRAC_Tcell_19bp.bam	None	None	None_None_chr2:47980472-47980493_54	CAGGGTTCTGGATATCTGTNGG	CAGGGTTCTGGATATCTGTNGG
chr2	47996041	47996063	chr2:47996041-47996063	66	+	0	GAGTTTAATGGATATCTGTTGG	5		CRL1684_TRAC_Tcell_19bp.bam	None	None	None_None_chr2:47996041-47996063_66	CAGGGTTCTGGATATCTGTNGG	none
chr2	48154595	48154617	chr2:48154595-48154617	138	+	0	ATGGGTCCTTGATATCTGTTAG	5	CATGGGTCCTTGATATCTGTTAG	CRL1684_TRAC_Tcell_19bp.bam	None	None	None_None_chr2:48154595-48154617_138	CAGGGTTCTGGATATCTGTNGG	CA-GGGTTCTGGATATCTGTNGG
chr2	53027540	53027562	chr2:53027540-53027562	10	+	0	CATGTACCTGGAGATCTGTGGG	5		CRL1684_TRAC_Tcell_19bp.bam	None	None	None_None_chr2:53027540-53027562_10	CAGGGTTCTGGATATCTGTNGG	none
chr2	53087673	53087695	chr2:53087673-53087695	22	-	0	TTAGGATATGGATATCTTTGGG	6		CRL1684_TRAC_Tcell_19bp.bam	None	None	None_None_chr2:53087673-53087695_22	CAGGGTTCTGGATATCTGTNGG	none
chr2	54428040	54428062	chr2:54428040-54428062	14	-	0	CTGTTGTATGGATATCTGTAAG	6		CRL1684_TRAC_Tcell_19bp.bam	None	None	None_None_chr2:54428040-54428062_14	CAGGGTTCTGGATATCTGTNGG	none
chr2	57172656	57172678	chr2:57172656-57172678	18	-	0	CATTTTTTTATATATCTGTTGG	6		CRL1684_TRAC_Tcell_19bp.bam	None	None	None_None_chr2:57172656-57172678_18	CAGGGTTCTGGATATCTGTNGG	none
chr2	59728368	59728389	chr2:59728368-59728389	6	-	0			CAGGGATA-GGCTATCTGTGGG	CRL1684_TRAC_Tcell_19bp.bam	None	None	None_None_chr2:59728368-59728389_6	CAGGGTTCTGGATATCTGTNGG	CAGGGTTCTGGATATCTGTNGG
chr2	64924972	64924994	chr2:64924972-64924994	8	-	0	CATGGTGGTGTATACCTGTGGT	6		CRL1684_TRAC_Tcell_19bp.bam	None	None	None_None_chr2:64924972-64924994_8	CAGGGTTCTGGATATCTGTNGG	none
chr2	67050617	67050639	chr2:67050617-67050639	78	+	0	CAAAGTTCTGGATATCTGTTGC	3		CRL1684_TRAC_Tcell_19bp.bam	None	None	None_None_chr2:67050617-67050639_78	CAGGGTTCTGGATATCTGTNGG	none
chr2	67192079	67192101	chr2:67192079-67192101	8	+	0	TTTGGTTCTGTATATATGCTGG	6		CRL1684_TRAC_Tcell_19bp.bam	None	None	None_None_chr2:67192079-67192101_8	CAGGGTTCTGGATATCTGTNGG	none
chr2	677129	677150	chr2:677129-677150	8	-	0			CAGGGTCCTG-AGACCTGTGGG	CRL1684_TRAC_Tcell_19bp.bam	None	None	None_None_chr2:677129-677150_8	CAGGGTTCTGGATATCTGTNGG	CAGGGTTCTGGATATCTGTNGG
chr2	7221239	7221261	chr2:7221239-7221261	20	-	0	CATAGTTCTGAAGATCTGTCTT	6		CRL1684_TRAC_Tcell_19bp.bam	None	None	None_None_chr2:7221239-7221261_20	CAGGGTTCTGGATATCTGTNGG	none
chr2	73173173	73173195	chr2:73173173-73173195	8	-	0	CGGGAGTGTGCATATCTGTTGG	5		CRL1684_TRAC_Tcell_19bp.bam	None	None	None_None_chr2:73173173-73173195_8	CAGGGTTCTGGATATCTGTNGG	none
chr2	74203681	74203704	chr2:74203681-74203704	6	-	0			CAAGGTACTGAATATCCTGTAGG	CRL1684_TRAC_Tcell_19bp.bam	None	None	None_None_chr2:74203681-74203704_6	CAGGGTTCTGGATATCTGTNGG	CAGGGTTCTGGATATC-TGTNGG
chr2	7746665	7746687	chr2:7746665-7746687	28	-	0	CCGGGTTTTAGATATCCATGGG	5		CRL1684_TRAC_Tcell_19bp.bam	None	None	None_None_chr2:7746665-7746687_28	CAGGGTTCTGGATATCTGTNGG	none
chr2	77977582	77977604	chr2:77977582-77977604	28	+	0	AGCGGTTCTGCATATCTCTGGG	5	TAGCGGTTCTGCATATCTCTGGG	CRL1684_TRAC_Tcell_19bp.bam	None	None	None_None_chr2:77977582-77977604_28	CAGGGTTCTGGATATCTGTNGG	CAG-GGTTCTGGATATCTGTNGG
chr2	7974573	7974595	chr2:7974573-7974595	18	+	0	GAGGATTCTGGAATTCTGTGGG	4		CRL1684_TRAC_Tcell_19bp.bam	None	None	None_None_chr2:7974573-7974595_18	CAGGGTTCTGGATATCTGTNGG	none
chr2	8435648	8435670	chr2:8435648-8435670	22	-	0	TAGGGTTTTGCATATGTGTGGG	4		CRL1684_TRAC_Tcell_19bp.bam	None	None	None_None_chr2:8435648-8435670_22	CAGGGTTCTGGATATCTGTNGG	none
chr2	85496656	85496678	chr2:85496656-85496678	10	+	0	CTTAGAACTGTATATCTGTTGG	6		CRL1684_TRAC_Tcell_19bp.bam	None	None	None_None_chr2:85496656-85496678_10	CAGGGTTCTGGATATCTGTNGG	none
chr2	9178907	9178929	chr2:9178907-9178929	6	+	0	CAGGGCTCAGGGGACCTGTGGG	5		CRL1684_TRAC_Tcell_19bp.bam	None	None	None_None_chr2:9178907-9178929_6	CAGGGTTCTGGATATCTGTNGG	none
chr2	99290802	99290824	chr2:99290802-99290824	6	-	0	AAAAGTACCTGATATCTGTTGG	6		CRL1684_TRAC_Tcell_19bp.bam	None	None	None_None_chr2:99290802-99290824_6	CAGGGTTCTGGATATCTGTNGG	none
chr3	100638762	100638784	chr3:100638762-100638784	14	+	0	CTCTGTTCTGGATTACTGTTGG	5		CRL1684_TRAC_Tcell_19bp.bam	None	None	None_None_chr3:100638762-100638784_14	CAGGGTTCTGGATATCTGTNGG	none
chr3	104428758	104428780	chr3:104428758-104428780	10	-	0	CTAGGTTTAGGATATCTGGGGG	5		CRL1684_TRAC_Tcell_19bp.bam	None	None	None_None_chr3:104428758-104428780_10	CAGGGTTCTGGATATCTGTNGG	none
chr3	109280444	109280466	chr3:109280444-109280466	14	+	0	CACTGTTAGTCATATCTGTGGG	6		CRL1684_TRAC_Tcell_19bp.bam	None	None	None_None_chr3:109280444-109280466_14	CAGGGTTCTGGATATCTGTNGG	none
chr3	110333169	110333191	chr3:110333169-110333191	16	-	0	GATGATTTAGGGTATCTGTCGG	6		CRL1684_TRAC_Tcell_19bp.bam	None	None	None_None_chr3:110333169-110333191_16	CAGGGTTCTGGATATCTGTNGG	none
chr3	111096243	111096265	chr3:111096243-111096265	8	-	0	CAAAGTTCTACATATCTCTAGG	5		CRL1684_TRAC_Tcell_19bp.bam	None	None	None_None_chr3:111096243-111096265_8	CAGGGTTCTGGATATCTGTNGG	none
chr3	113641762	113641784	chr3:113641762-113641784	22	-	0	GATGCCAATGGATATCTGTAGG	6		CRL1684_TRAC_Tcell_19bp.bam	None	None	None_None_chr3:113641762-113641784_22	CAGGGTTCTGGATATCTGTNGG	none
chr3	114403501	114403523	chr3:114403501-114403523	20	-	0	TAGAGTTCCAGATATTTGTTGG	5		CRL1684_TRAC_Tcell_19bp.bam	None	None	None_None_chr3:114403501-114403523_20	CAGGGTTCTGGATATCTGTNGG	none
chr3	116679229	116679251	chr3:116679229-116679251	48	+	0	GAGGAGCTAGGATATCTGTTGG	6		CRL1684_TRAC_Tcell_19bp.bam	None	None	None_None_chr3:116679229-116679251_48	CAGGGTTCTGGATATCTGTNGG	none
chr3	123666316	123666339	chr3:123666316-123666339	14	+	0			CAGGGAACTGGATGATCTGAGGG	CRL1684_TRAC_Tcell_19bp.bam	None	None	None_None_chr3:123666316-123666339_14	CAGGGTTCTGGATATCTGTNGG	CAGGGTTCTGGAT-ATCTGTNGG
chr3	126474700	126474722	chr3:126474700-126474722	20	+	0	GCAGGTTAAGGATATCTGTTGC	6	CAGG-TTAAGGATATCTGTTGC	CRL1684_TRAC_Tcell_19bp.bam	None	None	None_None_chr3:126474700-126474722_20	CAGGGTTCTGGATATCTGTNGG	CAGGGTTCTGGATATCTGTNGG
chr3	133343745	133343767	chr3:133343745-133343767	26	+	0	TAGGGTTGTGGATATCTGATGG	3		CRL1684_TRAC_Tcell_19bp.bam	None	None	None_None_chr3:133343745-133343767_26	CAGGGTTCTGGATATCTGTNGG	none
chr3	135311465	135311487	chr3:135311465-135311487	58	-	0	CTGGGATGGGGATATCTGTGAG	5		CRL1684_TRAC_Tcell_19bp.bam	None	None	None_None_chr3:135311465-135311487_58	CAGGGTTCTGGATATCTGTNGG	none
chr3	137025558	137025580	chr3:137025558-137025580	14	+	0	CTGGGCTCTGACTGTCTGTGGG	5		CRL1684_TRAC_Tcell_19bp.bam	None	None	None_None_chr3:137025558-137025580_14	CAGGGTTCTGGATATCTGTNGG	none
chr3	137803250	137803272	chr3:137803250-137803272	8	-	0	TTGTGATCTGGATATCTTTGGG	5		CRL1684_TRAC_Tcell_19bp.bam	None	None	None_None_chr3:137803250-137803272_8	CAGGGTTCTGGATATCTGTNGG	none
chr3	145805983	145806005	chr3:145805983-145806005	68	-	0	TAGGGTCCTTCATATCTGTGGG	4		CRL1684_TRAC_Tcell_19bp.bam	None	None	None_None_chr3:145805983-145806005_68	CAGGGTTCTGGATATCTGTNGG	none
chr3	15302244	15302265	chr3:15302244-15302265	198	+	0			CAGGGTGCTGGA-ATCTGTGGG	CRL1684_TRAC_Tcell_19bp.bam	None	None	None_None_chr3:15302244-15302265_198	CAGGGTTCTGGATATCTGTNGG	CAGGGTTCTGGATATCTGTNGG
chr3	15513808	15513830	chr3:15513808-15513830	306	-	0	TCAGGATCTGGATATCTGTGGG	4	CAGGAT-CTGGATATCTGTGGG	CRL1684_TRAC_Tcell_19bp.bam	None	None	None_None_chr3:15513808-15513830_306	CAGGGTTCTGGATATCTGTNGG	CAGGGTTCTGGATATCTGTNGG
chr3	157829211	157829233	chr3:157829211-157829233	16	-	0	GATGATTCAGGTTATCTGGTGG	6		CRL1684_TRAC_Tcell_19bp.bam	None	None	None_None_chr3:157829211-157829233_16	CAGGGTTCTGGATATCTGTNGG	none
chr3	159039772	159039794	chr3:159039772-159039794	20	+	0	CAAGATTCCAGATACCTGTGGG	5		CRL1684_TRAC_Tcell_19bp.bam	None	None	None_None_chr3:159039772-159039794_20	CAGGGTTCTGGATATCTGTNGG	none
chr3	171465979	171466002	chr3:171465979-171466002	14	-	0			CAGGTTGCATGAATATCTGTGGG	CRL1684_TRAC_Tcell_19bp.bam	None	None	None_None_chr3:171465979-171466002_14	CAGGGTTCTGGATATCTGTNGG	CAGGGTTC-TGGATATCTGTNGG
chr3	171933516	171933538	chr3:171933516-171933538	8	-	0	CAAGGTCTTGAATATCTGTGGC	5		CRL1684_TRAC_Tcell_19bp.bam	None	None	None_None_chr3:171933516-171933538_8	CAGGGTTCTGGATATCTGTNGG	none
chr3	178580240	178580262	chr3:178580240-178580262	16	-	0	ATTGGTTCTGGTTATGTGTTGG	5	CATTGGTTCTGGTTATGTGTTGG	CRL1684_TRAC_Tcell_19bp.bam	None	None	None_None_chr3:178580240-178580262_16	CAGGGTTCTGGATATCTGTNGG	CAG-GGTTCTGGATATCTGTNGG
chr3	181194297	181194319	chr3:181194297-181194319	10	+	0	CAGGGTTGTGGGAATCCTTCTG	6		CRL1684_TRAC_Tcell_19bp.bam	None	None	None_None_chr3:181194297-181194319_10	CAGGGTTCTGGATATCTGTNGG	none
chr3	189477505	189477527	chr3:189477505-189477527	22	-	0	AGGGATCCGGGGTATCTGTGGG	6	CAGGGATCCGGGGTATCTGTGGG	CRL1684_TRAC_Tcell_19bp.bam	None	None	None_None_chr3:189477505-189477527_22	CAGGGTTCTGGATATCTGTNGG	CAGGGTTCTGGA-TATCTGTNGG
chr3	190392920	190392942	chr3:190392920-190392942	22	+	0	AATCATTCTGGCTATCTGTGGG	5		CRL1684_TRAC_Tcell_19bp.bam	None	None	None_None_chr3:190392920-190392942_22	CAGGGTTCTGGATATCTGTNGG	none
chr3	193489265	193489286	chr3:193489265-193489286	482	-	0			CAGGTTTCTAGATA-CTGTTGG	CRL1684_TRAC_Tcell_19bp.bam	None	None	None_None_chr3:193489265-193489286_482	CAGGGTTCTGGATATCTGTNGG	CAGGGTTCTGGATATCTGTNGG
chr3	22891345	22891367	chr3:22891345-22891367	8	-	0	TTGAGTTCGAGAAATCTGTGGG	6		CRL1684_TRAC_Tcell_19bp.bam	None	None	None_None_chr3:22891345-22891367_8	CAGGGTTCTGGATATCTGTNGG	none
chr3	23065374	23065396	chr3:23065374-23065396	6	+	0	AGGATCTCTGGATATCTGTATG	6	CAGGATCTCTGGATATCTGTATG	CRL1684_TRAC_Tcell_19bp.bam	None	None	None_None_chr3:23065374-23065396_6	CAGGGTTCTGGATATCTGTNGG	CAGGGT-TCTGGATATCTGTNGG
chr3	33026780	33026802	chr3:33026780-33026802	20	-	0	GAGGGTAGTGCCTCTCTGTGGG	6		CRL1684_TRAC_Tcell_19bp.bam	None	None	None_None_chr3:33026780-33026802_20	CAGGGTTCTGGATATCTGTNGG	none
chr3	36723215	36723237	chr3:36723215-36723237	20	+	0	GATGATTTAGGATATCTGGTGG	6		CRL1684_TRAC_Tcell_19bp.bam	None	None	None_None_chr3:36723215-36723237_20	CAGGGTTCTGGATATCTGTNGG	none
chr3	36929659	36929681	chr3:36929659-36929681	10	-	0	TAGGGATCTGGATGTCTTTGGG	4		CRL1684_TRAC_Tcell_19bp.bam	None	None	None_None_chr3:36929659-36929681_10	CAGGGTTCTGGATATCTGTNGG	none
chr3	37465859	37465881	chr3:37465859-37465881	12	+	0	GGGGGCACTGGGTACCTGTTGG	6		CRL1684_TRAC_Tcell_19bp.bam	None	None	None_None_chr3:37465859-37465881_12	CAGGGTTCTGGATATCTGTNGG	none
chr3	39224133	39224154	chr3:39224133-39224154	644	-	0			GAGGGTTCTGGAT-TCTGTGGG	CRL1684_TRAC_Tcell_19bp.bam	None	None	None_None_chr3:39224133-39224154_644	CAGGGTTCTGGATATCTGTNGG	CAGGGTTCTGGATATCTGTNGG
chr3	39276880	39276902	chr3:39276880-39276902	6	+	0	CAGACTTGTGGTTCTTTGTGGG	6		CRL1684_TRAC_Tcell_19bp.bam	None	None	None_None_chr3:39276880-39276902_6	CAGGGTTCTGGATATCTGTNGG	none
chr3	41189493	41189515	chr3:41189493-41189515	16	+	0	AATACTGATGGATATCTGTTGG	6		CRL1684_TRAC_Tcell_19bp.bam	None	None	None_None_chr3:41189493-41189515_16	CAGGGTTCTGGATATCTGTNGG	none
chr3	42598929	42598951	chr3:42598929-42598951	20	+	0	TAGATATCTAGATATCTGTAGA	6		CRL1684_TRAC_Tcell_19bp.bam	None	None	None_None_chr3:42598929-42598951_20	CAGGGTTCTGGATATCTGTNGG	none
chr3	43100427	43100448	chr3:43100427-43100448	232	+	0			TTGGATTCTGG-TATCTGTGGG	CRL1684_TRAC_Tcell_19bp.bam	None	None	None_None_chr3:43100427-43100448_232	CAGGGTTCTGGATATCTGTNGG	CAGGGTTCTGGATATCTGTNGG
chr3	45564090	45564112	chr3:45564090-45564112	8	+	0	CAGCATCTGGGTTATCTGTGGG	6		CRL1684_TRAC_Tcell_19bp.bam	None	None	None_None_chr3:45564090-45564112_8	CAGGGTTCTGGATATCTGTNGG	none
chr3	46844732	46844754	chr3:46844732-46844754	14	-	0	TCGGGTTCAGGATATCTTAGGG	5	TCGGGTTCAGGATATCT-TAGG	CRL1684_TRAC_Tcell_19bp.bam	None	None	None_None_chr3:46844732-46844754_14	CAGGGTTCTGGATATCTGTNGG	CAGGGTTCTGGATATCTGTNGG
chr3	47074705	47074727	chr3:47074705-47074727	30	-	0	CAGGGGCGTGTATATATCTGGG	6		CRL1684_TRAC_Tcell_19bp.bam	None	None	None_None_chr3:47074705-47074727_30	CAGGGTTCTGGATATCTGTNGG	none
chr3	49510529	49510551	chr3:49510529-49510551	24	+	0	CTGGGATGAGGATGTCTGTGGG	5		CRL1684_TRAC_Tcell_19bp.bam	None	None	None_None_chr3:49510529-49510551_24	CAGGGTTCTGGATATCTGTNGG	none
chr3	51698919	51698941	chr3:51698919-51698941	12	+	0	CTGGTCTTCTGATATCTGTGGG	6		CRL1684_TRAC_Tcell_19bp.bam	None	None	None_None_chr3:51698919-51698941_12	CAGGGTTCTGGATATCTGTNGG	none
chr3	5267295	5267317	chr3:5267295-5267317	6	+	0	CAGGATTCCAAATATCTTTGGA	6		CRL1684_TRAC_Tcell_19bp.bam	None	None	None_None_chr3:5267295-5267317_6	CAGGGTTCTGGATATCTGTNGG	none
chr3	52875785	52875807	chr3:52875785-52875807	8	+	0	CTGCCCTCTTGACATCTGTAGG	6		CRL1684_TRAC_Tcell_19bp.bam	None	None	None_None_chr3:52875785-52875807_8	CAGGGTTCTGGATATCTGTNGG	none
chr3	58562997	58563019	chr3:58562997-58563019	10	+	0	CCAGCAAATGGATATCTGTGGG	6		CRL1684_TRAC_Tcell_19bp.bam	None	None	None_None_chr3:58562997-58563019_10	CAGGGTTCTGGATATCTGTNGG	none
chr3	59170572	59170594	chr3:59170572-59170594	14	+	0	AAGGGTCCAAGATGTCTGTGGA	6		CRL1684_TRAC_Tcell_19bp.bam	None	None	None_None_chr3:59170572-59170594_14	CAGGGTTCTGGATATCTGTNGG	none
chr3	61004179	61004201	chr3:61004179-61004201	16	+	0	AAAAGTTCTGAATATCTGTTGA	5		CRL1684_TRAC_Tcell_19bp.bam	None	None	None_None_chr3:61004179-61004201_16	CAGGGTTCTGGATATCTGTNGG	none
chr3	62098432	62098454	chr3:62098432-62098454	6	+	0	TGTGGATTTGGGTATCTGTGGG	6		CRL1684_TRAC_Tcell_19bp.bam	None	None	None_None_chr3:62098432-62098454_6	CAGGGTTCTGGATATCTGTNGG	none
chr3	64086857	64086879	chr3:64086857-64086879	10	-	0	CAGGTAAGAGGATATCTGTGGG	5		CRL1684_TRAC_Tcell_19bp.bam	None	None	None_None_chr3:64086857-64086879_10	CAGGGTTCTGGATATCTGTNGG	none
chr3	66835743	66835765	chr3:66835743-66835765	6	+	0	TAAAGTTCTGGTTATCTGGAAG	6		CRL1684_TRAC_Tcell_19bp.bam	None	None	None_None_chr3:66835743-66835765_6	CAGGGTTCTGGATATCTGTNGG	none
chr3	67123887	67123909	chr3:67123887-67123909	12	-	0	CAGCAGCCAGGATATCTGTGGA	6		CRL1684_TRAC_Tcell_19bp.bam	None	None	None_None_chr3:67123887-67123909_12	CAGGGTTCTGGATATCTGTNGG	none
chr3	68309310	68309332	chr3:68309310-68309332	94	-	0	CAAGGTACTAGATATCTTTGGG	4		CRL1684_TRAC_Tcell_19bp.bam	None	None	None_None_chr3:68309310-68309332_94	CAGGGTTCTGGATATCTGTNGG	none
chr3	75623499	75623521	chr3:75623499-75623521	6	-	0	GGGCTTTATGGCTATCTGTGGG	6		CRL1684_TRAC_Tcell_19bp.bam	None	None	None_None_chr3:75623499-75623521_6	CAGGGTTCTGGATATCTGTNGG	none
chr3	77348898	77348920	chr3:77348898-77348920	22	-	0	CAGACAAATGAATATCTGTTGG	6		CRL1684_TRAC_Tcell_19bp.bam	None	None	None_None_chr3:77348898-77348920_22	CAGGGTTCTGGATATCTGTNGG	none
chr3	81656140	81656162	chr3:81656140-81656162	8	-	0	GTAGGGTGTGGATATCTTTTGG	6	TAGGGTG-TGGATATCTTTTGG	CRL1684_TRAC_Tcell_19bp.bam	None	None	None_None_chr3:81656140-81656162_8	CAGGGTTCTGGATATCTGTNGG	CAGGGTTCTGGATATCTGTNGG
chr3	86598602	86598624	chr3:86598602-86598624	10	+	0	AAAGCTCTTGGATATCTGTGGG	5		CRL1684_TRAC_Tcell_19bp.bam	None	None	None_None_chr3:86598602-86598624_10	CAGGGTTCTGGATATCTGTNGG	none
chr3	87473870	87473892	chr3:87473870-87473892	10	+	0	CTTGATTTAGGATATCTGGTGG	6		CRL1684_TRAC_Tcell_19bp.bam	None	None	None_None_chr3:87473870-87473892_10	CAGGGTTCTGGATATCTGTNGG	none
chr3	88789837	88789859	chr3:88789837-88789859	6	-	0	CATGTTCTTAGTTATCTGTGGG	6		CRL1684_TRAC_Tcell_19bp.bam	None	None	None_None_chr3:88789837-88789859_6	CAGGGTTCTGGATATCTGTNGG	none
chr3	88975072	88975094	chr3:88975072-88975094	54	-	0	CAAGGTTATGGATATCTGAGGT	4	CAAGGTTATGGATATCTG-AGG	CRL1684_TRAC_Tcell_19bp.bam	None	None	None_None_chr3:88975072-88975094_54	CAGGGTTCTGGATATCTGTNGG	CAGGGTTCTGGATATCTGTNGG
chr3	94495975	94495997	chr3:94495975-94495997	24	+	0	CAGGCTCCAAGGTATCTTTAGG	6		CRL1684_TRAC_Tcell_19bp.bam	None	None	None_None_chr3:94495975-94495997_24	CAGGGTTCTGGATATCTGTNGG	none
chr3	9626162	9626184	chr3:9626162-9626184	12	+	0	CAGGGCTCTTGGCTTCTCTGGG	6		CRL1684_TRAC_Tcell_19bp.bam	None	None	None_None_chr3:9626162-9626184_12	CAGGGTTCTGGATATCTGTNGG	none
chr4	101713461	101713483	chr4:101713461-101713483	14	-	0	GTGGCTTTGGGGTATCTGTGGG	6		CRL1684_TRAC_Tcell_19bp.bam	None	None	None_None_chr4:101713461-101713483_14	CAGGGTTCTGGATATCTGTNGG	none
chr4	104564446	104564468	chr4:104564446-104564468	12	+	0	ACTGGTTCTGTCTATCTGATGG	6		CRL1684_TRAC_Tcell_19bp.bam	None	None	None_None_chr4:104564446-104564468_12	CAGGGTTCTGGATATCTGTNGG	none
chr4	108930281	108930303	chr4:108930281-108930303	10	+	0	CAGGGGGTTAGGAATCTGTGGG	6		CRL1684_TRAC_Tcell_19bp.bam	None	None	None_None_chr4:108930281-108930303_10	CAGGGTTCTGGATATCTGTNGG	none
chr4	111987050	111987072	chr4:111987050-111987072	14	-	0	AACTGTTCTGGACATATTTTGG	6		CRL1684_TRAC_Tcell_19bp.bam	None	None	None_None_chr4:111987050-111987072_14	CAGGGTTCTGGATATCTGTNGG	none
chr4	11201779	11201801	chr4:11201779-11201801	8	+	0	CTGGGTTCTAGACCTTTGTTGA	6		CRL1684_TRAC_Tcell_19bp.bam	None	None	None_None_chr4:11201779-11201801_8	CAGGGTTCTGGATATCTGTNGG	none
chr4	113696054	113696076	chr4:113696054-113696076	14	-	0	TAGCCATGTGGATATCTGTGGC	6		CRL1684_TRAC_Tcell_19bp.bam	None	None	None_None_chr4:113696054-113696076_14	CAGGGTTCTGGATATCTGTNGG	none
chr4	114111699	114111721	chr4:114111699-114111721	16	+	0	AAGGGATCCTGATATCTGTGGG	4		CRL1684_TRAC_Tcell_19bp.bam	None	None	None_None_chr4:114111699-114111721_16	CAGGGTTCTGGATATCTGTNGG	none
chr4	115225720	115225741	chr4:115225720-115225741	14	-	0			CAGGGTCCTGGAT-TCTGTGAG	CRL1684_TRAC_Tcell_19bp.bam	None	None	None_None_chr4:115225720-115225741_14	CAGGGTTCTGGATATCTGTNGG	CAGGGTTCTGGATATCTGTNGG
chr4	116167109	116167131	chr4:116167109-116167131	18	+	0	GAGGGTTGAAAACATCTGTGGG	6		CRL1684_TRAC_Tcell_19bp.bam	None	None	None_None_chr4:116167109-116167131_18	CAGGGTTCTGGATATCTGTNGG	none
chr4	116969227	116969249	chr4:116969227-116969249	6	-	0	GATGATTTAGGATATCTGGTGG	6		CRL1684_TRAC_Tcell_19bp.bam	None	None	None_None_chr4:116969227-116969249_6	CAGGGTTCTGGATATCTGTNGG	none
chr4	121022803	121022825	chr4:121022803-121022825	26	-	0	AATGATTTAGGGTATCTGTTGG	6		CRL1684_TRAC_Tcell_19bp.bam	None	None	None_None_chr4:121022803-121022825_26	CAGGGTTCTGGATATCTGTNGG	none
chr4	124640929	124640951	chr4:124640929-124640951	26	+	0	CAGGTATAGGCATATCTGTAGG	5		CRL1684_TRAC_Tcell_19bp.bam	None	None	None_None_chr4:124640929-124640951_26	CAGGGTTCTGGATATCTGTNGG	none
chr4	127402256	127402278	chr4:127402256-127402278	14	+	0	CATGAATTTTGGTATCTGTGGG	6		CRL1684_TRAC_Tcell_19bp.bam	None	None	None_None_chr4:127402256-127402278_14	CAGGGTTCTGGATATCTGTNGG	none
chr4	12900184	12900206	chr4:12900184-12900206	144	-	0	AAGGGTTAAAGCTATCTGTGGG	5		CRL1684_TRAC_Tcell_19bp.bam	None	None	None_None_chr4:12900184-12900206_144	CAGGGTTCTGGATATCTGTNGG	none
chr4	136392902	136392924	chr4:136392902-136392924	16	+	0	TAGGATTGTGGTCATCTGTGGG	5		CRL1684_TRAC_Tcell_19bp.bam	None	None	None_None_chr4:136392902-136392924_16	CAGGGTTCTGGATATCTGTNGG	none
chr4	13938341	13938363	chr4:13938341-13938363	8	-	0	CATGGTTCTTGATACCTGTAGG	3		CRL1684_TRAC_Tcell_19bp.bam	None	None	None_None_chr4:13938341-13938363_8	CAGGGTTCTGGATATCTGTNGG	none
chr4	145398416	145398438	chr4:145398416-145398438	12	-	0	TTAGGACCTGGATATCTTTGGG	6		CRL1684_TRAC_Tcell_19bp.bam	None	None	None_None_chr4:145398416-145398438_12	CAGGGTTCTGGATATCTGTNGG	none
chr4	145921999	145922021	chr4:145921999-145922021	12	-	0	CATTATACTGTATATCTGTTGG	5		CRL1684_TRAC_Tcell_19bp.bam	None	None	None_None_chr4:145921999-145922021_12	CAGGGTTCTGGATATCTGTNGG	none
chr4	148109086	148109108	chr4:148109086-148109108	14	-	0	AAGGTTCCTAGATAGCTGGTGG	6		CRL1684_TRAC_Tcell_19bp.bam	None	None	None_None_chr4:148109086-148109108_14	CAGGGTTCTGGATATCTGTNGG	none
chr4	151662299	151662321	chr4:151662299-151662321	96	+	0	TATGGTGGAGGATATCTGTTGG	5		CRL1684_TRAC_Tcell_19bp.bam	None	None	None_None_chr4:151662299-151662321_96	CAGGGTTCTGGATATCTGTNGG	none
chr4	153536485	153536507	chr4:153536485-153536507	16	+	0	CAGGGCACTGGAGTTCTGTTGG	4		CRL1684_TRAC_Tcell_19bp.bam	None	None	None_None_chr4:153536485-153536507_16	CAGGGTTCTGGATATCTGTNGG	none
chr4	156773119	156773141	chr4:156773119-156773141	120	+	0	GAGGGATATGGATATCTTTTGG	4		CRL1684_TRAC_Tcell_19bp.bam	None	None	None_None_chr4:156773119-156773141_120	CAGGGTTCTGGATATCTGTNGG	none
chr4	156805912	156805934	chr4:156805912-156805934	8	-	0	AAGGGTGTAGGGTTTCTGTGGG	6		CRL1684_TRAC_Tcell_19bp.bam	None	None	None_None_chr4:156805912-156805934_8	CAGGGTTCTGGATATCTGTNGG	none
chr4	157723518	157723540	chr4:157723518-157723540	8	-	0	CAAAGTTCCACAGATCTGTAGG	6		CRL1684_TRAC_Tcell_19bp.bam	None	None	None_None_chr4:157723518-157723540_8	CAGGGTTCTGGATATCTGTNGG	none
chr4	157985042	157985064	chr4:157985042-157985064	18	-	0	CAGCCATGAGGATATCTGAAGG	6		CRL1684_TRAC_Tcell_19bp.bam	None	None	None_None_chr4:157985042-157985064_18	CAGGGTTCTGGATATCTGTNGG	none
chr4	158849551	158849572	chr4:158849551-158849572	6	+	0			GGGGCTTCTGGAT-TCTGTAGG	CRL1684_TRAC_Tcell_19bp.bam	None	None	None_None_chr4:158849551-158849572_6	CAGGGTTCTGGATATCTGTNGG	CAGGGTTCTGGATATCTGTNGG
chr4	159754635	159754657	chr4:159754635-159754657	8	+	0	GATGATTTAGGGTATCTGTTGG	6		CRL1684_TRAC_Tcell_19bp.bam	None	None	None_None_chr4:159754635-159754657_8	CAGGGTTCTGGATATCTGTNGG	none
chr4	16052280	16052301	chr4:16052280-16052301	8	-	0			CAGGGCTGTGGAT-TCTGTGGG	CRL1684_TRAC_Tcell_19bp.bam	None	None	None_None_chr4:16052280-16052301_8	CAGGGTTCTGGATATCTGTNGG	CAGGGTTCTGGATATCTGTNGG
chr4	163497805	163497826	chr4:163497805-163497826	6	+	0			CAGGGCG-TGGATATCTTTTGG	CRL1684_TRAC_Tcell_19bp.bam	None	None	None_None_chr4:163497805-163497826_6	CAGGGTTCTGGATATCTGTNGG	CAGGGTTCTGGATATCTGTNGG
chr4	170343702	170343724	chr4:170343702-170343724	26	+	0	ACAGGCTTTGGATATCTGTAAG	6	CAGGCTT-TGGATATCTGTAAG	CRL1684_TRAC_Tcell_19bp.bam	None	None	None_None_chr4:170343702-170343724_26	CAGGGTTCTGGATATCTGTNGG	CAGGGTTCTGGATATCTGTNGG
chr4	17272974	17272996	chr4:17272974-17272996	16	+	0	GCAGGATCTGGGTATCTGTAAG	6	CAGGAT-CTGGGTATCTGTAAG	CRL1684_TRAC_Tcell_19bp.bam	None	None	None_None_chr4:17272974-17272996_16	CAGGGTTCTGGATATCTGTNGG	CAGGGTTCTGGATATCTGTNGG
chr4	173476978	173477000	chr4:173476978-173477000	22	+	0	CTGGGTGATGTGTATGTGTTGG	6		CRL1684_TRAC_Tcell_19bp.bam	None	None	None_None_chr4:173476978-173477000_22	CAGGGTTCTGGATATCTGTNGG	none
chr4	181863764	181863786	chr4:181863764-181863786	14	-	0	CTGGGGTATGTATATCTGTAAG	5		CRL1684_TRAC_Tcell_19bp.bam	None	None	None_None_chr4:181863764-181863786_14	CAGGGTTCTGGATATCTGTNGG	none
chr4	186624831	186624853	chr4:186624831-186624853	10	-	0	GATGGAGGTGGACATCTGTTGG	6		CRL1684_TRAC_Tcell_19bp.bam	None	None	None_None_chr4:186624831-186624853_10	CAGGGTTCTGGATATCTGTNGG	none
chr4	188439878	188439900	chr4:188439878-188439900	10	+	0	CAGGGGACTGGATATCTGCAAG	4		CRL1684_TRAC_Tcell_19bp.bam	None	None	None_None_chr4:188439878-188439900_10	CAGGGTTCTGGATATCTGTNGG	none
chr4	188608862	188608884	chr4:188608862-188608884	18	+	0	CTTGGTTCTGGCTATCTGTGTG	4		CRL1684_TRAC_Tcell_19bp.bam	None	None	None_None_chr4:188608862-188608884_18	CAGGGTTCTGGATATCTGTNGG	none
chr4	188664001	188664023	chr4:188664001-188664023	20	+	0	CGGACTTCAGCATATCTTTTGG	6		CRL1684_TRAC_Tcell_19bp.bam	None	None	None_None_chr4:188664001-188664023_20	CAGGGTTCTGGATATCTGTNGG	none
chr4	189019629	189019651	chr4:189019629-189019651	20	+	0	CTCCAATCTGGATATCTGTTGA	6		CRL1684_TRAC_Tcell_19bp.bam	None	None	None_None_chr4:189019629-189019651_20	CAGGGTTCTGGATATCTGTNGG	none
chr4	189289193	189289215	chr4:189289193-189289215	16	-	0	CAGGGTCCTGGATGTGGGCAGA	6		CRL1684_TRAC_Tcell_19bp.bam	None	None	None_None_chr4:189289193-189289215_16	CAGGGTTCTGGATATCTGTNGG	none
chr4	20659118	20659141	chr4:20659118-20659141	12	-	0			CAGGATTCCTGAGTATCTGTAGG	CRL1684_TRAC_Tcell_19bp.bam	None	None	None_None_chr4:20659118-20659141_12	CAGGGTTCTGGATATCTGTNGG	CAGGGTTCTGGA-TATCTGTNGG
chr4	20834353	20834375	chr4:20834353-20834375	142	+	0	CAGGGTACTGGGTATATGTGGG	3		CRL1684_TRAC_Tcell_19bp.bam	None	None	None_None_chr4:20834353-20834375_142	CAGGGTTCTGGATATCTGTNGG	none
chr4	2353040	2353062	chr4:2353040-2353062	8	+	0	GAGGGGCCAGAACATCTGTGGG	6		CRL1684_TRAC_Tcell_19bp.bam	None	None	None_None_chr4:2353040-2353062_8	CAGGGTTCTGGATATCTGTNGG	none
chr4	2702596	2702618	chr4:2702596-2702618	160	-	0	GTGGGGCTGGGATATCTGTGGG	6		CRL1684_TRAC_Tcell_19bp.bam	None	None	None_None_chr4:2702596-2702618_160	CAGGGTTCTGGATATCTGTNGG	none
chr4	3045518	3045540	chr4:3045518-3045540	12	+	0	AGGAGTTATGAATATCTGTGAG	6		CRL1684_TRAC_Tcell_19bp.bam	None	None	None_None_chr4:3045518-3045540_12	CAGGGTTCTGGATATCTGTNGG	none
chr4	32393881	32393903	chr4:32393881-32393903	8	+	0	CAGTTGGGTGGATATCTGTGTG	6		CRL1684_TRAC_Tcell_19bp.bam	None	None	None_None_chr4:32393881-32393903_8	CAGGGTTCTGGATATCTGTNGG	none
chr4	38975034	38975056	chr4:38975034-38975056	8	-	0	AAGGGCCCTCAATATCTGCTGG	6		CRL1684_TRAC_Tcell_19bp.bam	None	None	None_None_chr4:38975034-38975056_8	CAGGGTTCTGGATATCTGTNGG	none
chr4	4147453	4147475	chr4:4147453-4147475	6	-	0	ATGCTTTATGGCTATCTGTGGG	6		CRL1684_TRAC_Tcell_19bp.bam	None	None	None_None_chr4:4147453-4147475_6	CAGGGTTCTGGATATCTGTNGG	none
chr4	41713009	41713031	chr4:41713009-41713031	34	-	0	AAAGTTACAGGATATCTGTCAG	6		CRL1684_TRAC_Tcell_19bp.bam	None	None	None_None_chr4:41713009-41713031_34	CAGGGTTCTGGATATCTGTNGG	none
chr4	47273766	47273788	chr4:47273766-47273788	16	+	0	CCAGACTCAGGATATCTGTCAG	6		CRL1684_TRAC_Tcell_19bp.bam	None	None	None_None_chr4:47273766-47273788_16	CAGGGTTCTGGATATCTGTNGG	none
chr4	56466780	56466802	chr4:56466780-56466802	46	-	0	GAAGGGAATGGATATCTGTTGG	5	AAGGGAA-TGGATATCTGTTGG	CRL1684_TRAC_Tcell_19bp.bam	None	None	None_None_chr4:56466780-56466802_46	CAGGGTTCTGGATATCTGTNGG	CAGGGTTCTGGATATCTGTNGG
chr4	56586607	56586629	chr4:56586607-56586629	14	+	0	CTCAGTTGGGAATATCTGTAGG	6		CRL1684_TRAC_Tcell_19bp.bam	None	None	None_None_chr4:56586607-56586629_14	CAGGGTTCTGGATATCTGTNGG	none
chr4	5683327	5683349	chr4:5683327-5683349	26	-	0	CTCTTATCTGCATATCTGTGGG	6		CRL1684_TRAC_Tcell_19bp.bam	None	None	None_None_chr4:5683327-5683349_26	CAGGGTTCTGGATATCTGTNGG	none
chr4	56845095	56845117	chr4:56845095-56845117	6	-	0	TCTGATTCTGGAAACCTGTAGG	6		CRL1684_TRAC_Tcell_19bp.bam	None	None	None_None_chr4:56845095-56845117_6	CAGGGTTCTGGATATCTGTNGG	none
chr4	57043008	57043030	chr4:57043008-57043030	10	-	0	CCGCTCTCTCGGTATCTGTTGG	6		CRL1684_TRAC_Tcell_19bp.bam	None	None	None_None_chr4:57043008-57043030_10	CAGGGTTCTGGATATCTGTNGG	none
chr4	57114001	57114023	chr4:57114001-57114023	8	+	0	CAAGTTTCTTGATATCTGTGGG	3		CRL1684_TRAC_Tcell_19bp.bam	None	None	None_None_chr4:57114001-57114023_8	CAGGGTTCTGGATATCTGTNGG	none
chr4	61861532	61861554	chr4:61861532-61861554	8	+	0	TGGGGTTGTGATTATCTGTTGG	5		CRL1684_TRAC_Tcell_19bp.bam	None	None	None_None_chr4:61861532-61861554_8	CAGGGTTCTGGATATCTGTNGG	none
chr4	6221520	6221542	chr4:6221520-6221542	6	-	0	CAGGGTTCGCCATATCTGTGGG	3		CRL1684_TRAC_Tcell_19bp.bam	None	None	None_None_chr4:6221520-6221542_6	CAGGGTTCTGGATATCTGTNGG	none
chr4	66181209	66181231	chr4:66181209-66181231	8	+	0	CCAGATTCTGGATATATTGTGG	6		CRL1684_TRAC_Tcell_19bp.bam	None	None	None_None_chr4:66181209-66181231_8	CAGGGTTCTGGATATCTGTNGG	none
chr4	66420639	66420661	chr4:66420639-66420661	6	+	0	TGAGGTTCTTATTATCTGTAGG	6		CRL1684_TRAC_Tcell_19bp.bam	None	None	None_None_chr4:66420639-66420661_6	CAGGGTTCTGGATATCTGTNGG	none
chr4	67257173	67257196	chr4:67257173-67257196	12	+	0			CAGGTTTCTGGGATATTTGTCAG	CRL1684_TRAC_Tcell_19bp.bam	None	None	None_None_chr4:67257173-67257196_12	CAGGGTTCTGGATATCTGTNGG	CAGGGTTCTGG-ATATCTGTNGG
chr4	70144388	70144410	chr4:70144388-70144410	12	-	0	CTGTGGTATGTATATCTGATGG	6		CRL1684_TRAC_Tcell_19bp.bam	None	None	None_None_chr4:70144388-70144410_12	CAGGGTTCTGGATATCTGTNGG	none
chr4	70341147	70341169	chr4:70341147-70341169	12	-	0	CCAGGGTAAGGTTATCTGTAGG	6	CAGGGTAA-GGTTATCTGTAGG	CRL1684_TRAC_Tcell_19bp.bam	None	None	None_None_chr4:70341147-70341169_12	CAGGGTTCTGGATATCTGTNGG	CAGGGTTCTGGATATCTGTNGG
chr4	70834312	70834333	chr4:70834312-70834333	8	-	0			GAGGGTT-TACATATCTGTGGG	CRL1684_TRAC_Tcell_19bp.bam	None	None	None_None_chr4:70834312-70834333_8	CAGGGTTCTGGATATCTGTNGG	CAGGGTTCTGGATATCTGTNGG
chr4	71903361	71903383	chr4:71903361-71903383	24	+	0	GTGGATCCTGGATTTCTGTGGG	5		CRL1684_TRAC_Tcell_19bp.bam	None	None	None_None_chr4:71903361-71903383_24	CAGGGTTCTGGATATCTGTNGG	none
chr4	73474077	73474099	chr4:73474077-73474099	10	+	0	CACAGTTCTGCATGTCTGTGGA	5		CRL1684_TRAC_Tcell_19bp.bam	None	None	None_None_chr4:73474077-73474099_10	CAGGGTTCTGGATATCTGTNGG	none
chr4	75571446	75571468	chr4:75571446-75571468	40	-	0	GAGCCATGTGGATATCTGGGGG	6		CRL1684_TRAC_Tcell_19bp.bam	None	None	None_None_chr4:75571446-75571468_40	CAGGGTTCTGGATATCTGTNGG	none
chr4	76455908	76455930	chr4:76455908-76455930	12	-	0	CATGGGTTTTGGTACCTGTAGG	6		CRL1684_TRAC_Tcell_19bp.bam	None	None	None_None_chr4:76455908-76455930_12	CAGGGTTCTGGATATCTGTNGG	none
chr4	7907916	7907938	chr4:7907916-7907938	22	-	0	CATGCTTTTAAATATCTGTGGG	5		CRL1684_TRAC_Tcell_19bp.bam	None	None	None_None_chr4:7907916-7907938_22	CAGGGTTCTGGATATCTGTNGG	none
chr4	83085200	83085222	chr4:83085200-83085222	26	-	0	TAGGCCTCCGGATAACTGTGGG	5		CRL1684_TRAC_Tcell_19bp.bam	None	None	None_None_chr4:83085200-83085222_26	CAGGGTTCTGGATATCTGTNGG	none
chr4	83603899	83603921	chr4:83603899-83603921	42	-	0	AAGGGTACTGTATATGTGTGGG	4		CRL1684_TRAC_Tcell_19bp.bam	None	None	None_None_chr4:83603899-83603921_42	CAGGGTTCTGGATATCTGTNGG	none
chr4	85672960	85672982	chr4:85672960-85672982	26	+	0	GAGGGTGCTGGATTTCTTGTAG	6	GAGGGTGCTGGATTTCTTGTAGG	CRL1684_TRAC_Tcell_19bp.bam	None	None	None_None_chr4:85672960-85672982_26	CAGGGTTCTGGATATCTGTNGG	CAGGGTTCTGGATATCT-GTNGG
chr4	88286771	88286793	chr4:88286771-88286793	8	+	0	CATTCTACTACATATCTGTTGG	6		CRL1684_TRAC_Tcell_19bp.bam	None	None	None_None_chr4:88286771-88286793_8	CAGGGTTCTGGATATCTGTNGG	none
chr4	88389555	88389577	chr4:88389555-88389577	20	+	0	AAGAGTTAAGGATATCTGTAAG	5		CRL1684_TRAC_Tcell_19bp.bam	None	None	None_None_chr4:88389555-88389577_20	CAGGGTTCTGGATATCTGTNGG	none
chr4	89318994	89319016	chr4:89318994-89319016	6	+	0	TTGGAATATGGATATCTTTGGG	6		CRL1684_TRAC_Tcell_19bp.bam	None	None	None_None_chr4:89318994-89319016_6	CAGGGTTCTGGATATCTGTNGG	none
chr4	99579491	99579513	chr4:99579491-99579513	142	-	0	GAGCTACATGGATATCTGTGGG	6		CRL1684_TRAC_Tcell_19bp.bam	None	None	None_None_chr4:99579491-99579513_142	CAGGGTTCTGGATATCTGTNGG	none
chr4	99825151	99825173	chr4:99825151-99825173	8	+	0	TGTGCTTCTGGCTATCTGTGTG	6		CRL1684_TRAC_Tcell_19bp.bam	None	None	None_None_chr4:99825151-99825173_8	CAGGGTTCTGGATATCTGTNGG	none
chr5	10716313	10716335	chr5:10716313-10716335	8	+	0	TCGAAGTCTAGATATCTGTGGG	6		CRL1684_TRAC_Tcell_19bp.bam	None	None	None_None_chr5:10716313-10716335_8	CAGGGTTCTGGATATCTGTNGG	none
chr5	109301241	109301263	chr5:109301241-109301263	12	+	0	CAGGGTAATGAAAATCAATTGG	6		CRL1684_TRAC_Tcell_19bp.bam	None	None	None_None_chr5:109301241-109301263_12	CAGGGTTCTGGATATCTGTNGG	none
chr5	111409755	111409777	chr5:111409755-111409777	16	+	0	CAAGGTTCCACATATCTCTAGG	5		CRL1684_TRAC_Tcell_19bp.bam	None	None	None_None_chr5:111409755-111409777_16	CAGGGTTCTGGATATCTGTNGG	none
chr5	114327338	114327360	chr5:114327338-114327360	16	-	0	CTTGGTTCAGGGAATCTGTGGG	5		CRL1684_TRAC_Tcell_19bp.bam	None	None	None_None_chr5:114327338-114327360_16	CAGGGTTCTGGATATCTGTNGG	none
chr5	119227069	119227091	chr5:119227069-119227091	8	+	0	AATGCTTTAGGCTATCTGTGGG	6		CRL1684_TRAC_Tcell_19bp.bam	None	None	None_None_chr5:119227069-119227091_8	CAGGGTTCTGGATATCTGTNGG	none
chr5	120429878	120429900	chr5:120429878-120429900	18	+	0	GAGTTCTGTAGATATCTGTCGG	6		CRL1684_TRAC_Tcell_19bp.bam	None	None	None_None_chr5:120429878-120429900_18	CAGGGTTCTGGATATCTGTNGG	none
chr5	123617543	123617565	chr5:123617543-123617565	14	-	0	CAGGATTAAGCATGTCTGAAGG	6		CRL1684_TRAC_Tcell_19bp.bam	None	None	None_None_chr5:123617543-123617565_14	CAGGGTTCTGGATATCTGTNGG	none
chr5	127578770	127578792	chr5:127578770-127578792	6	+	0	CATTGTTGTGCATACCTGTAGT	6		CRL1684_TRAC_Tcell_19bp.bam	None	None	None_None_chr5:127578770-127578792_6	CAGGGTTCTGGATATCTGTNGG	none
chr5	128810765	128810787	chr5:128810765-128810787	28	-	0	TAGGGTCCTGAATATCTCTGGG	4		CRL1684_TRAC_Tcell_19bp.bam	None	None	None_None_chr5:128810765-128810787_28	CAGGGTTCTGGATATCTGTNGG	none
chr5	129241418	129241440	chr5:129241418-129241440	22	-	0	CATGTGTATGAATATCTGTAGG	5		CRL1684_TRAC_Tcell_19bp.bam	None	None	None_None_chr5:129241418-129241440_22	CAGGGTTCTGGATATCTGTNGG	none
chr5	132613076	132613098	chr5:132613076-132613098	12	-	0	CTGCATTCTAGATACCTGTGAG	6		CRL1684_TRAC_Tcell_19bp.bam	None	None	None_None_chr5:132613076-132613098_12	CAGGGTTCTGGATATCTGTNGG	none
chr5	133531948	133531970	chr5:133531948-133531970	54	-	0	CTAGGATGTGGATATCTGTGGG	4		CRL1684_TRAC_Tcell_19bp.bam	None	None	None_None_chr5:133531948-133531970_54	CAGGGTTCTGGATATCTGTNGG	none
chr5	134191382	134191404	chr5:134191382-134191404	10	-	0	CTTGGCTCTGGATTTCTTTAGG	5		CRL1684_TRAC_Tcell_19bp.bam	None	None	None_None_chr5:134191382-134191404_10	CAGGGTTCTGGATATCTGTNGG	none
chr5	135991086	135991108	chr5:135991086-135991108	6	-	0	CAGGACTCCAGATATCTGTCTG	5		CRL1684_TRAC_Tcell_19bp.bam	None	None	None_None_chr5:135991086-135991108_6	CAGGGTTCTGGATATCTGTNGG	none
chr5	139646390	139646412	chr5:139646390-139646412	8	+	0	TAGGCTTCAGGAGATCTGTGGA	5		CRL1684_TRAC_Tcell_19bp.bam	None	None	None_None_chr5:139646390-139646412_8	CAGGGTTCTGGATATCTGTNGG	none
chr5	141135800	141135822	chr5:141135800-141135822	10	-	0	CATGGTCATTTATATCTGTGAG	6		CRL1684_TRAC_Tcell_19bp.bam	None	None	None_None_chr5:141135800-141135822_10	CAGGGTTCTGGATATCTGTNGG	none
chr5	146528955	146528977	chr5:146528955-146528977	6	+	0	AATGATTCAGGATGTCTGTGAG	6		CRL1684_TRAC_Tcell_19bp.bam	None	None	None_None_chr5:146528955-146528977_6	CAGGGTTCTGGATATCTGTNGG	none
chr5	14958465	14958487	chr5:14958465-14958487	30	-	0	CAGAAATCAGTATATCTGTGGG	5		CRL1684_TRAC_Tcell_19bp.bam	None	None	None_None_chr5:14958465-14958487_30	CAGGGTTCTGGATATCTGTNGG	none
chr5	150260021	150260043	chr5:150260021-150260043	8	-	0	CTAGGTAGTGGATATCTGGGTG	6		CRL1684_TRAC_Tcell_19bp.bam	None	None	None_None_chr5:150260021-150260043_8	CAGGGTTCTGGATATCTGTNGG	none
chr5	151145162	151145184	chr5:151145162-151145184	12	+	0	CCGGGCCCTGGGGCTCTGTGGG	6		CRL1684_TRAC_Tcell_19bp.bam	None	None	None_None_chr5:151145162-151145184_12	CAGGGTTCTGGATATCTGTNGG	none
chr5	152075684	152075706	chr5:152075684-152075706	6	-	0	ATGGGATCTGGATAGCTCTGGG	5		CRL1684_TRAC_Tcell_19bp.bam	None	None	None_None_chr5:152075684-152075706_6	CAGGGTTCTGGATATCTGTNGG	none
chr5	153429489	153429511	chr5:153429489-153429511	10	-	0	AATACTTCTGAATATCTGTGGG	5		CRL1684_TRAC_Tcell_19bp.bam	None	None	None_None_chr5:153429489-153429511_10	CAGGGTTCTGGATATCTGTNGG	none
chr5	153490951	153490973	chr5:153490951-153490973	6	-	0	CACCGATCTGGATATTGTTGGG	6	CACCGATCTGGATAT-TGTTGG	CRL1684_TRAC_Tcell_19bp.bam	None	None	None_None_chr5:153490951-153490973_6	CAGGGTTCTGGATATCTGTNGG	CAGGGTTCTGGATATCTGTNGG
chr5	153510552	153510574	chr5:153510552-153510574	6	+	0	GATGAGTTTGGATATCTGCAGG	6		CRL1684_TRAC_Tcell_19bp.bam	None	None	None_None_chr5:153510552-153510574_6	CAGGGTTCTGGATATCTGTNGG	none
chr5	154391642	154391664	chr5:154391642-154391664	22	-	0	TAAGGTTTTGGTTATCTGTAAG	5		CRL1684_TRAC_Tcell_19bp.bam	None	None	None_None_chr5:154391642-154391664_22	CAGGGTTCTGGATATCTGTNGG	none
chr5	155756274	155756296	chr5:155756274-155756296	20	+	0	TAGGGTACTGATTATCCATAGG	6		CRL1684_TRAC_Tcell_19bp.bam	None	None	None_None_chr5:155756274-155756296_20	CAGGGTTCTGGATATCTGTNGG	none
chr5	160772827	160772849	chr5:160772827-160772849	20	+	0	CAGATTCCCAGATATCTCTGGG	6		CRL1684_TRAC_Tcell_19bp.bam	None	None	None_None_chr5:160772827-160772849_20	CAGGGTTCTGGATATCTGTNGG	none
chr5	162871399	162871421	chr5:162871399-162871421	12	-	0	AAAAATATTGGATATCTGTGGG	6		CRL1684_TRAC_Tcell_19bp.bam	None	None	None_None_chr5:162871399-162871421_12	CAGGGTTCTGGATATCTGTNGG	none
chr5	168748952	168748974	chr5:168748952-168748974	10	-	0	TGGGGATATGGATATCTGAGGC	6		CRL1684_TRAC_Tcell_19bp.bam	None	None	None_None_chr5:168748952-168748974_10	CAGGGTTCTGGATATCTGTNGG	none
chr5	170246759	170246781	chr5:170246759-170246781	18	+	0	CAGGGTTCTGAGCAACTGTGAC	6		CRL1684_TRAC_Tcell_19bp.bam	None	None	None_None_chr5:170246759-170246781_18	CAGGGTTCTGGATATCTGTNGG	none
chr5	170513512	170513534	chr5:170513512-170513534	26	-	0	CAAGATTCAGGATCTCTGTTGG	4		CRL1684_TRAC_Tcell_19bp.bam	None	None	None_None_chr5:170513512-170513534_26	CAGGGTTCTGGATATCTGTNGG	none
chr5	171625360	171625382	chr5:171625360-171625382	22	-	0	GGGGGTAGGGAATATCTGTGGG	6		CRL1684_TRAC_Tcell_19bp.bam	None	None	None_None_chr5:171625360-171625382_22	CAGGGTTCTGGATATCTGTNGG	none
chr5	172691185	172691207	chr5:172691185-172691207	32	+	0	TAGGGTTCTAGAAATCTGTGGT	4		CRL1684_TRAC_Tcell_19bp.bam	None	None	None_None_chr5:172691185-172691207_32	CAGGGTTCTGGATATCTGTNGG	none
chr5	17499881	17499903	chr5:17499881-17499903	24	-	0	CAGCACCGTGGATATCTGTGAG	6		CRL1684_TRAC_Tcell_19bp.bam	None	None	None_None_chr5:17499881-17499903_24	CAGGGTTCTGGATATCTGTNGG	none
chr5	175217068	175217090	chr5:175217068-175217090	8	+	0	CAGGGCCCCGAATATCTTTTGG	5		CRL1684_TRAC_Tcell_19bp.bam	None	None	None_None_chr5:175217068-175217090_8	CAGGGTTCTGGATATCTGTNGG	none
chr5	177491407	177491429	chr5:177491407-177491429	10	+	0	CAGGGGTCTGCACCTGTGAAGG	6		CRL1684_TRAC_Tcell_19bp.bam	None	None	None_None_chr5:177491407-177491429_10	CAGGGTTCTGGATATCTGTNGG	none
chr5	179317271	179317293	chr5:179317271-179317293	34	-	0	CAGGGACAAGGATAGCTGTAGC	6		CRL1684_TRAC_Tcell_19bp.bam	None	None	None_None_chr5:179317271-179317293_34	CAGGGTTCTGGATATCTGTNGG	none
chr5	180080279	180080301	chr5:180080279-180080301	60	-	0	AAGGGTCCTGGATATCCTAGGT	6	AAGGGTCCTGGATATCC-TAGG	CRL1684_TRAC_Tcell_19bp.bam	None	None	None_None_chr5:180080279-180080301_60	CAGGGTTCTGGATATCTGTNGG	CAGGGTTCTGGATATCTGTNGG
chr5	18024238	18024260	chr5:18024238-18024260	36	+	0	CATTCATTTGGATATCTGTAGG	5		CRL1684_TRAC_Tcell_19bp.bam	None	None	None_None_chr5:18024238-18024260_36	CAGGGTTCTGGATATCTGTNGG	none
chr5	180704457	180704479	chr5:180704457-180704479	26	-	0	CAGGTTCTGGAATATCTGTTGG	5	CAGG-TTCTGGAATATCTGTTGG	CRL1684_TRAC_Tcell_19bp.bam	None	None	None_None_chr5:180704457-180704479_26	CAGGGTTCTGGATATCTGTNGG	CAGGGTTCTGGA-TATCTGTNGG
chr5	23762026	23762048	chr5:23762026-23762048	10	+	0	ATCTGTTCTGGTTATCTATTGG	6		CRL1684_TRAC_Tcell_19bp.bam	None	None	None_None_chr5:23762026-23762048_10	CAGGGTTCTGGATATCTGTNGG	none
chr5	23799807	23799829	chr5:23799807-23799829	12	+	0	GATGATTTAGGATATCTGGTGG	6		CRL1684_TRAC_Tcell_19bp.bam	None	None	None_None_chr5:23799807-23799829_12	CAGGGTTCTGGATATCTGTNGG	none
chr5	30037703	30037725	chr5:30037703-30037725	8	-	0	CAGGAGTCCAGATATCTTTAGG	5		CRL1684_TRAC_Tcell_19bp.bam	None	None	None_None_chr5:30037703-30037725_8	CAGGGTTCTGGATATCTGTNGG	none
chr5	35060153	35060175	chr5:35060153-35060175	24	+	0	CTTGGCCTTGGATATCTGTGTG	6		CRL1684_TRAC_Tcell_19bp.bam	None	None	None_None_chr5:35060153-35060175_24	CAGGGTTCTGGATATCTGTNGG	none
chr5	3540400	3540422	chr5:3540400-3540422	30	+	0	TACAGTTAAGGAGATCTGTAGG	6		CRL1684_TRAC_Tcell_19bp.bam	None	None	None_None_chr5:3540400-3540422_30	CAGGGTTCTGGATATCTGTNGG	none
chr5	40552614	40552636	chr5:40552614-40552636	8	-	0	CAGTGTTCAAGATATCTGTGGC	4		CRL1684_TRAC_Tcell_19bp.bam	None	None	None_None_chr5:40552614-40552636_8	CAGGGTTCTGGATATCTGTNGG	none
chr5	42247440	42247462	chr5:42247440-42247462	56	-	0	GGTGATTCAGGATATCTGTCAG	6		CRL1684_TRAC_Tcell_19bp.bam	None	None	None_None_chr5:42247440-42247462_56	CAGGGTTCTGGATATCTGTNGG	none
chr5	42503830	42503852	chr5:42503830-42503852	6	+	0	GAGGCTTATGGATATCTGGGGG	4		CRL1684_TRAC_Tcell_19bp.bam	None	None	None_None_chr5:42503830-42503852_6	CAGGGTTCTGGATATCTGTNGG	none
chr5	51823622	51823644	chr5:51823622-51823644	16	+	0	CATGTATTTGGATATCTGTTAG	5		CRL1684_TRAC_Tcell_19bp.bam	None	None	None_None_chr5:51823622-51823644_16	CAGGGTTCTGGATATCTGTNGG	none
chr5	52790792	52790814	chr5:52790792-52790814	6	+	0	TTAGGTCATGGATATCTTTGGG	6		CRL1684_TRAC_Tcell_19bp.bam	None	None	None_None_chr5:52790792-52790814_6	CAGGGTTCTGGATATCTGTNGG	none
chr5	5588238	5588260	chr5:5588238-5588260	12	-	0	ATGGGTTCTGCATATCTTTGGA	5	ATGGGTTCTGCATATCT-TTGG	CRL1684_TRAC_Tcell_19bp.bam	None	None	None_None_chr5:5588238-5588260_12	CAGGGTTCTGGATATCTGTNGG	CAGGGTTCTGGATATCTGTNGG
chr5	57493751	57493773	chr5:57493751-57493773	34	+	0	CCTGTAACTAGATATCTGTGGG	6		CRL1684_TRAC_Tcell_19bp.bam	None	None	None_None_chr5:57493751-57493773_34	CAGGGTTCTGGATATCTGTNGG	none
chr5	57514412	57514434	chr5:57514412-57514434	6	+	0	TTAGGACCTGGATATCTTTGGG	6		CRL1684_TRAC_Tcell_19bp.bam	None	None	None_None_chr5:57514412-57514434_6	CAGGGTTCTGGATATCTGTNGG	none
chr5	61280231	61280253	chr5:61280231-61280253	6	-	0	CAGCACTCAGGAGACCTGTTGG	6		CRL1684_TRAC_Tcell_19bp.bam	None	None	None_None_chr5:61280231-61280253_6	CAGGGTTCTGGATATCTGTNGG	none
chr5	62938742	62938764	chr5:62938742-62938764	716	-	0	TAGGGTTATGAAAATCTGTGGG	4		CRL1684_TRAC_Tcell_19bp.bam	None	None	None_None_chr5:62938742-62938764_716	CAGGGTTCTGGATATCTGTNGG	none
chr5	69153388	69153410	chr5:69153388-69153410	6	+	0	CTGGGTCCTGTATATCTCTAAG	5		CRL1684_TRAC_Tcell_19bp.bam	None	None	None_None_chr5:69153388-69153410_6	CAGGGTTCTGGATATCTGTNGG	none
chr5	76074100	76074122	chr5:76074100-76074122	16	+	0	GAAGGCTCTGGCTCTCTGGTGG	6		CRL1684_TRAC_Tcell_19bp.bam	None	None	None_None_chr5:76074100-76074122_16	CAGGGTTCTGGATATCTGTNGG	none
chr5	77829848	77829870	chr5:77829848-77829870	6	-	0	CATGGCTAAGGATAACTGGGGG	6		CRL1684_TRAC_Tcell_19bp.bam	None	None	None_None_chr5:77829848-77829870_6	CAGGGTTCTGGATATCTGTNGG	none
chr5	79914280	79914302	chr5:79914280-79914302	6	-	0	CAGTAGTTTGTATTTCTGTGGG	6		CRL1684_TRAC_Tcell_19bp.bam	None	None	None_None_chr5:79914280-79914302_6	CAGGGTTCTGGATATCTGTNGG	none
chr5	80782243	80782265	chr5:80782243-80782265	20	+	0	GTTGGCTCTTGATATCTGTGGG	5		CRL1684_TRAC_Tcell_19bp.bam	None	None	None_None_chr5:80782243-80782265_20	CAGGGTTCTGGATATCTGTNGG	none
chr5	83783669	83783691	chr5:83783669-83783691	18	-	0	TTAGGTTTTTAATATCTGTTGG	6		CRL1684_TRAC_Tcell_19bp.bam	None	None	None_None_chr5:83783669-83783691_18	CAGGGTTCTGGATATCTGTNGG	none
chr5	84161984	84162006	chr5:84161984-84162006	6	-	0	CTTGGGCTTGGATATCTGTAGA	6		CRL1684_TRAC_Tcell_19bp.bam	None	None	None_None_chr5:84161984-84162006_6	CAGGGTTCTGGATATCTGTNGG	none
chr5	8446870	8446892	chr5:8446870-8446892	6	-	0	TAGGATTCTGGATATTTTTGGG	4		CRL1684_TRAC_Tcell_19bp.bam	None	None	None_None_chr5:8446870-8446892_6	CAGGGTTCTGGATATCTGTNGG	none
chr5	89554983	89555005	chr5:89554983-89555005	6	-	0	CAGGTTTCACCATATCTCTCAG	6		CRL1684_TRAC_Tcell_19bp.bam	None	None	None_None_chr5:89554983-89555005_6	CAGGGTTCTGGATATCTGTNGG	none
chr5	9085021	9085043	chr5:9085021-9085043	10	+	0	CCCTGCTCTGGAGATCTGTGGG	5		CRL1684_TRAC_Tcell_19bp.bam	None	None	None_None_chr5:9085021-9085043_10	CAGGGTTCTGGATATCTGTNGG	none
chr5	93337281	93337303	chr5:93337281-93337303	84	-	0	CTGGTGTTTGGATATCTGTAGG	4		CRL1684_TRAC_Tcell_19bp.bam	None	None	None_None_chr5:93337281-93337303_84	CAGGGTTCTGGATATCTGTNGG	none
chr5	93842708	93842730	chr5:93842708-93842730	12	+	0	CAGGATTCCAGGTATCTCTGGG	5		CRL1684_TRAC_Tcell_19bp.bam	None	None	None_None_chr5:93842708-93842730_12	CAGGGTTCTGGATATCTGTNGG	none
chr5	96315748	96315770	chr5:96315748-96315770	6	+	0	CCAGGCCCTAAATATCTGTAGG	6		CRL1684_TRAC_Tcell_19bp.bam	None	None	None_None_chr5:96315748-96315770_6	CAGGGTTCTGGATATCTGTNGG	none
chr5	99208725	99208747	chr5:99208725-99208747	16	-	0	TATGGTTCATAATATCTATGGG	6		CRL1684_TRAC_Tcell_19bp.bam	None	None	None_None_chr5:99208725-99208747_16	CAGGGTTCTGGATATCTGTNGG	none
chr6	102538458	102538480	chr6:102538458-102538480	24	+	0	GATGATTTAGGGTATCTGTTGG	6		CRL1684_TRAC_Tcell_19bp.bam	None	None	None_None_chr6:102538458-102538480_24	CAGGGTTCTGGATATCTGTNGG	none
chr6	103167543	103167565	chr6:103167543-103167565	48	+	0	CCCTGTCCTAGATATCTGTGGG	5		CRL1684_TRAC_Tcell_19bp.bam	None	None	None_None_chr6:103167543-103167565_48	CAGGGTTCTGGATATCTGTNGG	none
chr6	105321764	105321786	chr6:105321764-105321786	10	+	0	TTGGGTACTAAATGTCTGTGGG	6		CRL1684_TRAC_Tcell_19bp.bam	None	None	None_None_chr6:105321764-105321786_10	CAGGGTTCTGGATATCTGTNGG	none
chr6	105928946	105928968	chr6:105928946-105928968	44	+	0	TGTCTTTGTGGATATCTGTTGG	6		CRL1684_TRAC_Tcell_19bp.bam	None	None	None_None_chr6:105928946-105928968_44	CAGGGTTCTGGATATCTGTNGG	none
chr6	108702665	108702687	chr6:108702665-108702687	6	-	0	TTGGGTCCTGTATATCTCTTAG	6		CRL1684_TRAC_Tcell_19bp.bam	None	None	None_None_chr6:108702665-108702687_6	CAGGGTTCTGGATATCTGTNGG	none
chr6	117151224	117151246	chr6:117151224-117151246	8	-	0	GATGATTTAGGATATCTGGTGG	6		CRL1684_TRAC_Tcell_19bp.bam	None	None	None_None_chr6:117151224-117151246_8	CAGGGTTCTGGATATCTGTNGG	none
chr6	12464140	12464162	chr6:12464140-12464162	26	+	0	CAGGGATCTGGATATCAGTGGC	3		CRL1684_TRAC_Tcell_19bp.bam	None	None	None_None_chr6:12464140-12464162_26	CAGGGTTCTGGATATCTGTNGG	none
chr6	130356273	130356295	chr6:130356273-130356295	20	-	0	GAGTGTTCTGGGTATGTGTAGG	4		CRL1684_TRAC_Tcell_19bp.bam	None	None	None_None_chr6:130356273-130356295_20	CAGGGTTCTGGATATCTGTNGG	none
chr6	13166129	13166151	chr6:13166129-13166151	20	-	0	CAGCCATCTGGATATCTGGGGG	4		CRL1684_TRAC_Tcell_19bp.bam	None	None	None_None_chr6:13166129-13166151_20	CAGGGTTCTGGATATCTGTNGG	none
chr6	133479937	133479959	chr6:133479937-133479959	16	+	0	CAGAGTTTTAGATATCTATGGG	4		CRL1684_TRAC_Tcell_19bp.bam	None	None	None_None_chr6:133479937-133479959_16	CAGGGTTCTGGATATCTGTNGG	none
chr6	137603313	137603334	chr6:137603313-137603334	66	+	0			TAGGGGTTTGGATA-CTGTTGG	CRL1684_TRAC_Tcell_19bp.bam	None	None	None_None_chr6:137603313-137603334_66	CAGGGTTCTGGATATCTGTNGG	CAGGGTTCTGGATATCTGTNGG
chr6	138524404	138524426	chr6:138524404-138524426	10	-	0	TAGGGTAATGGTTATGTGTGGG	5		CRL1684_TRAC_Tcell_19bp.bam	None	None	None_None_chr6:138524404-138524426_10	CAGGGTTCTGGATATCTGTNGG	none
chr6	140209969	140209990	chr6:140209969-140209990	98	-	0			GAGGGTTCAG-ATATCTGTGAG	CRL1684_TRAC_Tcell_19bp.bam	None	None	None_None_chr6:140209969-140209990_98	CAGGGTTCTGGATATCTGTNGG	CAGGGTTCTGGATATCTGTNGG
chr6	140692346	140692368	chr6:140692346-140692368	18	+	0	GTGGTGCCTGCATATCTGTCGG	6		CRL1684_TRAC_Tcell_19bp.bam	None	None	None_None_chr6:140692346-140692368_18	CAGGGTTCTGGATATCTGTNGG	none
chr6	142398942	142398964	chr6:142398942-142398964	6	-	0	CTGGGTTCTGGAAATATGTGGG	3		CRL1684_TRAC_Tcell_19bp.bam	None	None	None_None_chr6:142398942-142398964_6	CAGGGTTCTGGATATCTGTNGG	none
chr6	145997040	145997062	chr6:145997040-145997062	6	+	0	TTTGGTTCTGTTTATATGTTGG	6		CRL1684_TRAC_Tcell_19bp.bam	None	None	None_None_chr6:145997040-145997062_6	CAGGGTTCTGGATATCTGTNGG	none
chr6	146937172	146937194	chr6:146937172-146937194	8	+	0	TCAGGATATGGATATCTTTGGG	6	CAGGATA-TGGATATCTTTGGG	CRL1684_TRAC_Tcell_19bp.bam	None	None	None_None_chr6:146937172-146937194_8	CAGGGTTCTGGATATCTGTNGG	CAGGGTTCTGGATATCTGTNGG
chr6	149811033	149811055	chr6:149811033-149811055	6	+	0	TTGGTATTTGGATATCTGTTAG	6		CRL1684_TRAC_Tcell_19bp.bam	None	None	None_None_chr6:149811033-149811055_6	CAGGGTTCTGGATATCTGTNGG	none
chr6	151120134	151120156	chr6:151120134-151120156	6	-	0	CAAGTCCCTGGATCTCTGTAAG	6		CRL1684_TRAC_Tcell_19bp.bam	None	None	None_None_chr6:151120134-151120156_6	CAGGGTTCTGGATATCTGTNGG	none
chr6	154908202	154908224	chr6:154908202-154908224	18	-	0	TATGTTTCTAGTAATCTGTAGG	6		CRL1684_TRAC_Tcell_19bp.bam	None	None	None_None_chr6:154908202-154908224_18	CAGGGTTCTGGATATCTGTNGG	none
chr6	158237886	158237908	chr6:158237886-158237908	8	+	0	CCAGGGTATGAATATCTTTTGG	6	CAGGGTA-TGAATATCTTTTGG	CRL1684_TRAC_Tcell_19bp.bam	None	None	None_None_chr6:158237886-158237908_8	CAGGGTTCTGGATATCTGTNGG	CAGGGTTCTGGATATCTGTNGG
chr6	159251551	159251573	chr6:159251551-159251573	24	+	0	CAGAGTTCCCATGATCTGTAGG	6		CRL1684_TRAC_Tcell_19bp.bam	None	None	None_None_chr6:159251551-159251573_24	CAGGGTTCTGGATATCTGTNGG	none
chr6	162083842	162083864	chr6:162083842-162083864	18	-	0	ATGGGTTACAGATATCTGTCTG	6		CRL1684_TRAC_Tcell_19bp.bam	None	None	None_None_chr6:162083842-162083864_18	CAGGGTTCTGGATATCTGTNGG	none
chr6	164421990	164422012	chr6:164421990-164422012	38	+	0	GATGATTTAGGATATCTGTTGG	5		CRL1684_TRAC_Tcell_19bp.bam	None	None	None_None_chr6:164421990-164422012_38	CAGGGTTCTGGATATCTGTNGG	none
chr6	164788843	164788865	chr6:164788843-164788865	10	+	0	CTGAGTATAGGTTATCTGTTGG	6		CRL1684_TRAC_Tcell_19bp.bam	None	None	None_None_chr6:164788843-164788865_10	CAGGGTTCTGGATATCTGTNGG	none
chr6	167687452	167687474	chr6:167687452-167687474	10	-	0	GAAGGTTCAGGAAGTCTGTTAG	6		CRL1684_TRAC_Tcell_19bp.bam	None	None	None_None_chr6:167687452-167687474_10	CAGGGTTCTGGATATCTGTNGG	none
chr6	194850	194872	chr6:194850-194872	28	-	0	TGTGGTTCTGGTAATCTGTGGG	5		CRL1684_TRAC_Tcell_19bp.bam	None	None	None_None_chr6:194850-194872_28	CAGGGTTCTGGATATCTGTNGG	none
chr6	21225039	21225061	chr6:21225039-21225061	8	+	0	CCAGGTCCTGGGCATCTATTGG	6		CRL1684_TRAC_Tcell_19bp.bam	None	None	None_None_chr6:21225039-21225061_8	CAGGGTTCTGGATATCTGTNGG	none
chr6	25794065	25794087	chr6:25794065-25794087	10	-	0	CAGGCTGCAGTCTATTTGTTGG	6		CRL1684_TRAC_Tcell_19bp.bam	None	None	None_None_chr6:25794065-25794087_10	CAGGGTTCTGGATATCTGTNGG	none
chr6	28210211	28210233	chr6:28210211-28210233	56	-	0	ATGGGTCCAAGATATATGTTGG	6		CRL1684_TRAC_Tcell_19bp.bam	None	None	None_None_chr6:28210211-28210233_56	CAGGGTTCTGGATATCTGTNGG	none
chr6	32127399	32127421	chr6:32127399-32127421	22	+	0	AGGGTTTCTGGAAATCTGAGGG	5	GAGGGTTTCTGGAAATCTGAGGG	CRL1684_TRAC_Tcell_19bp.bam	None	None	None_None_chr6:32127399-32127421_22	CAGGGTTCTGGATATCTGTNGG	CAGGGTT-CTGGATATCTGTNGG
chr6	3474083	3474105	chr6:3474083-3474105	12	+	0	CCTGGCTCTGGATTTCTGTGGG	4		CRL1684_TRAC_Tcell_19bp.bam	None	None	None_None_chr6:3474083-3474105_12	CAGGGTTCTGGATATCTGTNGG	none
chr6	36325318	36325340	chr6:36325318-36325340	16	+	0	CAGGTTCCTGGCTCTCTGATGG	5		CRL1684_TRAC_Tcell_19bp.bam	None	None	None_None_chr6:36325318-36325340_16	CAGGGTTCTGGATATCTGTNGG	none
chr6	41678985	41679007	chr6:41678985-41679007	16	-	0	CTGGGTGCTGGGGATATGTGGG	5		CRL1684_TRAC_Tcell_19bp.bam	None	None	None_None_chr6:41678985-41679007_16	CAGGGTTCTGGATATCTGTNGG	none
chr6	4365586	4365608	chr6:4365586-4365608	8	+	0	CATGGTTTCGAGTATCTGGAGG	6		CRL1684_TRAC_Tcell_19bp.bam	None	None	None_None_chr6:4365586-4365608_8	CAGGGTTCTGGATATCTGTNGG	none
chr6	43918342	43918364	chr6:43918342-43918364	12	+	0	AAGTATCCTGGAAATCTGTGGG	5		CRL1684_TRAC_Tcell_19bp.bam	None	None	None_None_chr6:43918342-43918364_12	CAGGGTTCTGGATATCTGTNGG	none
chr6	45577622	45577644	chr6:45577622-45577644	22	-	0	TAAGGATCTGAACATCTTTGGG	6		CRL1684_TRAC_Tcell_19bp.bam	None	None	None_None_chr6:45577622-45577644_22	CAGGGTTCTGGATATCTGTNGG	none
chr6	51338906	51338928	chr6:51338906-51338928	8	-	0	AGTGGTTTGGGATATCTGCTGG	6		CRL1684_TRAC_Tcell_19bp.bam	None	None	None_None_chr6:51338906-51338928_8	CAGGGTTCTGGATATCTGTNGG	none
chr6	52574281	52574302	chr6:52574281-52574302	8	-	0			AAGCGTCCTGGATA-CTGTAGG	CRL1684_TRAC_Tcell_19bp.bam	None	None	None_None_chr6:52574281-52574302_8	CAGGGTTCTGGATATCTGTNGG	CAGGGTTCTGGATATCTGTNGG
chr6	5597175	5597197	chr6:5597175-5597197	6	-	0	CAAGTTTTTGGCCATCTGTTGG	5		CRL1684_TRAC_Tcell_19bp.bam	None	None	None_None_chr6:5597175-5597197_6	CAGGGTTCTGGATATCTGTNGG	none
chr6	62661030	62661053	chr6:62661030-62661053	8	+	0			CAGGGGTGTGGCTCATCTGTTGG	CRL1684_TRAC_Tcell_19bp.bam	None	None	None_None_chr6:62661030-62661053_8	CAGGGTTCTGGATATCTGTNGG	CAGGGTTCTGGAT-ATCTGTNGG
chr6	64017345	64017367	chr6:64017345-64017367	6	+	0	CTGGGGGTGGGAGATCTGTGGG	6		CRL1684_TRAC_Tcell_19bp.bam	None	None	None_None_chr6:64017345-64017367_6	CAGGGTTCTGGATATCTGTNGG	none
chr6	65712186	65712208	chr6:65712186-65712208	8	-	0	CAGTGTTCTAAATATCTGTCTG	4		CRL1684_TRAC_Tcell_19bp.bam	None	None	None_None_chr6:65712186-65712208_8	CAGGGTTCTGGATATCTGTNGG	none
chr6	65857855	65857877	chr6:65857855-65857877	36	-	0	AATGATTTAGGATATCTGTTGG	5		CRL1684_TRAC_Tcell_19bp.bam	None	None	None_None_chr6:65857855-65857877_36	CAGGGTTCTGGATATCTGTNGG	none
chr6	67751230	67751252	chr6:67751230-67751252	106	-	0	TAGGGTTACAGATATCTGTTGG	4		CRL1684_TRAC_Tcell_19bp.bam	None	None	None_None_chr6:67751230-67751252_106	CAGGGTTCTGGATATCTGTNGG	none
chr6	70288710	70288732	chr6:70288710-70288732	10	-	0	TTAGCATCTGGATATCTGGGGG	6		CRL1684_TRAC_Tcell_19bp.bam	None	None	None_None_chr6:70288710-70288732_10	CAGGGTTCTGGATATCTGTNGG	none
chr6	71578060	71578082	chr6:71578060-71578082	14	+	0	CCAGGAGCTAAATATCTGTGGG	6		CRL1684_TRAC_Tcell_19bp.bam	None	None	None_None_chr6:71578060-71578082_14	CAGGGTTCTGGATATCTGTNGG	none
chr6	72024878	72024900	chr6:72024878-72024900	12	+	0	CAGGATTCTTAAAATCTGTGGG	4		CRL1684_TRAC_Tcell_19bp.bam	None	None	None_None_chr6:72024878-72024900_12	CAGGGTTCTGGATATCTGTNGG	none
chr6	74678788	74678810	chr6:74678788-74678810	12	-	0	TAGGATTATGGATATATATAGG	5		CRL1684_TRAC_Tcell_19bp.bam	None	None	None_None_chr6:74678788-74678810_12	CAGGGTTCTGGATATCTGTNGG	none
chr6	84280507	84280528	chr6:84280507-84280528	26	+	0			AAGGGCTCTGGTT-TCTGTAGG	CRL1684_TRAC_Tcell_19bp.bam	None	None	None_None_chr6:84280507-84280528_26	CAGGGTTCTGGATATCTGTNGG	CAGGGTTCTGGATATCTGTNGG
chr6	84522268	84522290	chr6:84522268-84522290	10	+	0	CAGTGTGCTGGACACATGTGGG	5		CRL1684_TRAC_Tcell_19bp.bam	None	None	None_None_chr6:84522268-84522290_10	CAGGGTTCTGGATATCTGTNGG	none
chr6	85763736	85763758	chr6:85763736-85763758	38	-	0	GTGTTTTGTGGATATTTGTGGG	6		CRL1684_TRAC_Tcell_19bp.bam	None	None	None_None_chr6:85763736-85763758_38	CAGGGTTCTGGATATCTGTNGG	none
chr6	90031072	90031094	chr6:90031072-90031094	6	-	0	ATTGGTTCTGTTTATATGTTGG	6		CRL1684_TRAC_Tcell_19bp.bam	None	None	None_None_chr6:90031072-90031094_6	CAGGGTTCTGGATATCTGTNGG	none
chr6	90428628	90428650	chr6:90428628-90428650	8	-	0	CCCAGTCCTGGATCTCTCTAGG	6		CRL1684_TRAC_Tcell_19bp.bam	None	None	None_None_chr6:90428628-90428650_8	CAGGGTTCTGGATATCTGTNGG	none
chr6	94977802	94977824	chr6:94977802-94977824	16	-	0	GATGGTTTAGAATATCTGGTGG	6		CRL1684_TRAC_Tcell_19bp.bam	None	None	None_None_chr6:94977802-94977824_16	CAGGGTTCTGGATATCTGTNGG	none
chr6	97873201	97873223	chr6:97873201-97873223	12	+	0	CAGGCTTAGGGATATTTATGGG	5		CRL1684_TRAC_Tcell_19bp.bam	None	None	None_None_chr6:97873201-97873223_12	CAGGGTTCTGGATATCTGTNGG	none
chr6	99509872	99509894	chr6:99509872-99509894	14	-	0	CACAGATTTGGGTATATGTGGG	6		CRL1684_TRAC_Tcell_19bp.bam	None	None	None_None_chr6:99509872-99509894_14	CAGGGTTCTGGATATCTGTNGG	none
chr7	109519532	109519554	chr7:109519532-109519554	22	+	0	CAGGATACTGGAAATCTGTATG	4		CRL1684_TRAC_Tcell_19bp.bam	None	None	None_None_chr7:109519532-109519554_22	CAGGGTTCTGGATATCTGTNGG	none
chr7	114185375	114185397	chr7:114185375-114185397	6	+	0	CAAGTTGCTTAATATCTCTGGG	6		CRL1684_TRAC_Tcell_19bp.bam	None	None	None_None_chr7:114185375-114185397_6	CAGGGTTCTGGATATCTGTNGG	none
chr7	118005824	118005845	chr7:118005824-118005845	28	+	0			GAGGGTTCTGGATAAA-GTAGG	CRL1684_TRAC_Tcell_19bp.bam	None	None	None_None_chr7:118005824-118005845_28	CAGGGTTCTGGATATCTGTNGG	CAGGGTTCTGGATATCTGTNGG
chr7	118482322	118482344	chr7:118482322-118482344	42	-	0	GATGATTTAGGATATCTGGTGG	6		CRL1684_TRAC_Tcell_19bp.bam	None	None	None_None_chr7:118482322-118482344_42	CAGGGTTCTGGATATCTGTNGG	none
chr7	126078952	126078974	chr7:126078952-126078974	276	+	0	CAGGAGTCTGAATATCTGTGGG	3		CRL1684_TRAC_Tcell_19bp.bam	None	None	None_None_chr7:126078952-126078974_276	CAGGGTTCTGGATATCTGTNGG	none
chr7	129466261	129466283	chr7:129466261-129466283	6	+	0	GATGATACTGGATATGTGTTGG	5		CRL1684_TRAC_Tcell_19bp.bam	None	None	None_None_chr7:129466261-129466283_6	CAGGGTTCTGGATATCTGTNGG	none
chr7	129650785	129650807	chr7:129650785-129650807	156	+	0	AGGGGTTCTGGATATCTTGGTG	5	CAGGGGTTCTGGATATCTTGGTG	CRL1684_TRAC_Tcell_19bp.bam	None	None	None_None_chr7:129650785-129650807_156	CAGGGTTCTGGATATCTGTNGG	CAGGG-TTCTGGATATCTGTNGG
chr7	130432427	130432449	chr7:130432427-130432449	16	+	0	CTGAGTATGAGATATCTGTGGG	6		CRL1684_TRAC_Tcell_19bp.bam	None	None	None_None_chr7:130432427-130432449_16	CAGGGTTCTGGATATCTGTNGG	none
chr7	132290681	132290703	chr7:132290681-132290703	14	-	0	CATGATTCTGGATATCTCTCAG	4		CRL1684_TRAC_Tcell_19bp.bam	None	None	None_None_chr7:132290681-132290703_14	CAGGGTTCTGGATATCTGTNGG	none
chr7	132452901	132452923	chr7:132452901-132452923	8	+	0	CCAGGGAATGGATATGTGTTGG	6	CAGGGAA-TGGATATGTGTTGG	CRL1684_TRAC_Tcell_19bp.bam	None	None	None_None_chr7:132452901-132452923_8	CAGGGTTCTGGATATCTGTNGG	CAGGGTTCTGGATATCTGTNGG
chr7	133243340	133243362	chr7:133243340-133243362	34	+	0	CTAACCTCTGGATATCTATGGG	6		CRL1684_TRAC_Tcell_19bp.bam	None	None	None_None_chr7:133243340-133243362_34	CAGGGTTCTGGATATCTGTNGG	none
chr7	134120434	134120456	chr7:134120434-134120456	16	-	0	ATGGTATCTGGATGTCTATAGG	6		CRL1684_TRAC_Tcell_19bp.bam	None	None	None_None_chr7:134120434-134120456_16	CAGGGTTCTGGATATCTGTNGG	none
chr7	134193997	134194018	chr7:134193997-134194018	24	-	0			AAGGGTTCTC-ATATCTGTGGG	CRL1684_TRAC_Tcell_19bp.bam	None	None	None_None_chr7:134193997-134194018_24	CAGGGTTCTGGATATCTGTNGG	CAGGGTTCTGGATATCTGTNGG
chr7	134993890	134993912	chr7:134993890-134993912	10	-	0	AAATATTCTGGATATATTTGGG	6		CRL1684_TRAC_Tcell_19bp.bam	None	None	None_None_chr7:134993890-134993912_10	CAGGGTTCTGGATATCTGTNGG	none
chr7	140840065	140840087	chr7:140840065-140840087	10	-	0	AAGGGTACTGCTTCCCTGTTGG	6		CRL1684_TRAC_Tcell_19bp.bam	None	None	None_None_chr7:140840065-140840087_10	CAGGGTTCTGGATATCTGTNGG	none
chr7	141288050	141288072	chr7:141288050-141288072	18	-	0	CAGGGGTCAGGGCATCTGTCAG	5		CRL1684_TRAC_Tcell_19bp.bam	None	None	None_None_chr7:141288050-141288072_18	CAGGGTTCTGGATATCTGTNGG	none
chr7	149677715	149677737	chr7:149677715-149677737	12	-	0	GAGGTTTCTGGGTATCTAGTGG	5		CRL1684_TRAC_Tcell_19bp.bam	None	None	None_None_chr7:149677715-149677737_12	CAGGGTTCTGGATATCTGTNGG	none
chr7	152103023	152103045	chr7:152103023-152103045	16	+	0	AAGGGGACAGTAAATCTGTAGG	6		CRL1684_TRAC_Tcell_19bp.bam	None	None	None_None_chr7:152103023-152103045_16	CAGGGTTCTGGATATCTGTNGG	none
chr7	153068325	153068347	chr7:153068325-153068347	58	-	0	CTTGGGCTAGGATATCTGTTGG	6		CRL1684_TRAC_Tcell_19bp.bam	None	None	None_None_chr7:153068325-153068347_58	CAGGGTTCTGGATATCTGTNGG	none
chr7	21526263	21526285	chr7:21526263-21526285	14	+	0	GATGATTTAGGATATCTGGTGG	6		CRL1684_TRAC_Tcell_19bp.bam	None	None	None_None_chr7:21526263-21526285_14	CAGGGTTCTGGATATCTGTNGG	none
chr7	22695994	22696016	chr7:22695994-22696016	8	-	0	CATGGTGGTGCATGTCTGTAGT	6		CRL1684_TRAC_Tcell_19bp.bam	None	None	None_None_chr7:22695994-22696016_8	CAGGGTTCTGGATATCTGTNGG	none
chr7	26641322	26641344	chr7:26641322-26641344	10	+	0	TCAGCCTCTGGATATCTGTGGG	5	CAGCCT-CTGGATATCTGTGGG	CRL1684_TRAC_Tcell_19bp.bam	None	None	None_None_chr7:26641322-26641344_10	CAGGGTTCTGGATATCTGTNGG	CAGGGTTCTGGATATCTGTNGG
chr7	30127001	30127022	chr7:30127001-30127022	30	-	0			TAAGTTTCTGGAT-TCTGTAGG	CRL1684_TRAC_Tcell_19bp.bam	None	None	None_None_chr7:30127001-30127022_30	CAGGGTTCTGGATATCTGTNGG	CAGGGTTCTGGATATCTGTNGG
chr7	36219007	36219029	chr7:36219007-36219029	12	+	0	TTGGTATCTGGAAGTCTGTAGG	6		CRL1684_TRAC_Tcell_19bp.bam	None	None	None_None_chr7:36219007-36219029_12	CAGGGTTCTGGATATCTGTNGG	none
chr7	40918902	40918923	chr7:40918902-40918923	20	+	0			GAAGGATCTGG-TATCTGTGGG	CRL1684_TRAC_Tcell_19bp.bam	None	None	None_None_chr7:40918902-40918923_20	CAGGGTTCTGGATATCTGTNGG	CAGGGTTCTGGATATCTGTNGG
chr7	41105449	41105471	chr7:41105449-41105471	10	+	0	CAGGGTCAAGGTTATCTGTTGA	5		CRL1684_TRAC_Tcell_19bp.bam	None	None	None_None_chr7:41105449-41105471_10	CAGGGTTCTGGATATCTGTNGG	none
chr7	43458792	43458814	chr7:43458792-43458814	22	-	0	AATTTCTCTGGATAACTGTGGG	6		CRL1684_TRAC_Tcell_19bp.bam	None	None	None_None_chr7:43458792-43458814_22	CAGGGTTCTGGATATCTGTNGG	none
chr7	44676218	44676239	chr7:44676218-44676239	10	-	0			CAGGGCTCTGGGT-TATGTTGG	CRL1684_TRAC_Tcell_19bp.bam	None	None	None_None_chr7:44676218-44676239_10	CAGGGTTCTGGATATCTGTNGG	CAGGGTTCTGGATATCTGTNGG
chr7	47029961	47029983	chr7:47029961-47029983	22	+	0	AAAACATCTGGATATCTGTAAG	6		CRL1684_TRAC_Tcell_19bp.bam	None	None	None_None_chr7:47029961-47029983_22	CAGGGTTCTGGATATCTGTNGG	none
chr7	47512561	47512583	chr7:47512561-47512583	24	-	0	CAGAGTGCTGTATATCTGTTAG	4		CRL1684_TRAC_Tcell_19bp.bam	None	None	None_None_chr7:47512561-47512583_24	CAGGGTTCTGGATATCTGTNGG	none
chr7	48498370	48498392	chr7:48498370-48498392	6	+	0	CCTTGTTCAGGATATATGTGAG	6		CRL1684_TRAC_Tcell_19bp.bam	None	None	None_None_chr7:48498370-48498392_6	CAGGGTTCTGGATATCTGTNGG	none
chr7	50268563	50268585	chr7:50268563-50268585	10	+	0	CAGGGCCCTGGGTACCTGTGAG	5		CRL1684_TRAC_Tcell_19bp.bam	None	None	None_None_chr7:50268563-50268585_10	CAGGGTTCTGGATATCTGTNGG	none
chr7	52861507	52861529	chr7:52861507-52861529	14	-	0	TTGATTTATGGATATTTGTGGG	6		CRL1684_TRAC_Tcell_19bp.bam	None	None	None_None_chr7:52861507-52861529_14	CAGGGTTCTGGATATCTGTNGG	none
chr7	55275788	55275810	chr7:55275788-55275810	16	-	0	CAGGGGCATGGCTAACTGTTGG	5		CRL1684_TRAC_Tcell_19bp.bam	None	None	None_None_chr7:55275788-55275810_16	CAGGGTTCTGGATATCTGTNGG	none
chr7	55821380	55821402	chr7:55821380-55821402	48	-	0	CAGGGTTCTGGAATTGTGGGTG	5		CRL1684_TRAC_Tcell_19bp.bam	None	None	None_None_chr7:55821380-55821402_48	CAGGGTTCTGGATATCTGTNGG	none
chr7	6217788	6217810	chr7:6217788-6217810	44	-	0	TTAGGACCTGGATATCTTTGGG	6		CRL1684_TRAC_Tcell_19bp.bam	None	None	None_None_chr7:6217788-6217810_44	CAGGGTTCTGGATATCTGTNGG	none
chr7	63140834	63140856	chr7:63140834-63140856	122	-	0	CAGGGTTCTGGAATTGTGGGTG	5		CRL1684_TRAC_Tcell_19bp.bam	None	None	None_None_chr7:63140834-63140856_122	CAGGGTTCTGGATATCTGTNGG	none
chr7	64185523	64185545	chr7:64185523-64185545	6	+	0	CAGTGTTTTATATATCTAAAGG	6		CRL1684_TRAC_Tcell_19bp.bam	None	None	None_None_chr7:64185523-64185545_6	CAGGGTTCTGGATATCTGTNGG	none
chr7	65336985	65337007	chr7:65336985-65337007	30	+	0	GATGATTTAGGATATCTGGTGG	6		CRL1684_TRAC_Tcell_19bp.bam	None	None	None_None_chr7:65336985-65337007_30	CAGGGTTCTGGATATCTGTNGG	none
chr7	70905235	70905257	chr7:70905235-70905257	8	+	0	CTAGGATCTGGATACCTGTAGG	4		CRL1684_TRAC_Tcell_19bp.bam	None	None	None_None_chr7:70905235-70905257_8	CAGGGTTCTGGATATCTGTNGG	none
chr7	7400165	7400187	chr7:7400165-7400187	10	-	0	TGGGGACCTGGATATCTAGGGG	6		CRL1684_TRAC_Tcell_19bp.bam	None	None	None_None_chr7:7400165-7400187_10	CAGGGTTCTGGATATCTGTNGG	none
chr7	83324952	83324974	chr7:83324952-83324974	10	+	0	CCAGATACTAGATAGCTGTGGG	6		CRL1684_TRAC_Tcell_19bp.bam	None	None	None_None_chr7:83324952-83324974_10	CAGGGTTCTGGATATCTGTNGG	none
chr7	84278120	84278142	chr7:84278120-84278142	50	-	0	GATTATTTAGGATATCTGTTGG	6		CRL1684_TRAC_Tcell_19bp.bam	None	None	None_None_chr7:84278120-84278142_50	CAGGGTTCTGGATATCTGTNGG	none
chr7	84914765	84914787	chr7:84914765-84914787	8	-	0	CAGGGTTTAGGTGAGCTGTTGG	5		CRL1684_TRAC_Tcell_19bp.bam	None	None	None_None_chr7:84914765-84914787_8	CAGGGTTCTGGATATCTGTNGG	none
chr7	90414645	90414666	chr7:90414645-90414666	14	-	0			CAAGGTCCAGGATAT-TGTTGG	CRL1684_TRAC_Tcell_19bp.bam	None	None	None_None_chr7:90414645-90414666_14	CAGGGTTCTGGATATCTGTNGG	CAGGGTTCTGGATATCTGTNGG
chr7	90759840	90759863	chr7:90759840-90759863	14	-	0			CAGAGATCAGGATCATCTGTGGG	CRL1684_TRAC_Tcell_19bp.bam	None	None	None_None_chr7:90759840-90759863_14	CAGGGTTCTGGATATCTGTNGG	CAGGGTTCTGGAT-ATCTGTNGG
chr7	94378771	94378793	chr7:94378771-94378793	8	-	0	CTGTGTTTTGGTTATCTGTTGG	4		CRL1684_TRAC_Tcell_19bp.bam	None	None	None_None_chr7:94378771-94378793_8	CAGGGTTCTGGATATCTGTNGG	none
chr7	95276968	95276990	chr7:95276968-95276990	12	+	0	CAGGGTCCTGAAAGTCTGTGGG	4		CRL1684_TRAC_Tcell_19bp.bam	None	None	None_None_chr7:95276968-95276990_12	CAGGGTTCTGGATATCTGTNGG	none
chr7	97321997	97322019	chr7:97321997-97322019	14	-	0	ACAGGTTTTGGATAACTTTAGG	6	CAGGTTT-TGGATAACTTTAGG	CRL1684_TRAC_Tcell_19bp.bam	None	None	None_None_chr7:97321997-97322019_14	CAGGGTTCTGGATATCTGTNGG	CAGGGTTCTGGATATCTGTNGG
chr8	102424618	102424640	chr8:102424618-102424640	6	-	0	GAGGGGCCCAGAAATCTGTAGG	6		CRL1684_TRAC_Tcell_19bp.bam	None	None	None_None_chr8:102424618-102424640_6	CAGGGTTCTGGATATCTGTNGG	none
chr8	104473608	104473630	chr8:104473608-104473630	40	+	0	TTAGGATCTGGATATCTTTGGG	5	TAGGAT-CTGGATATCTTTGGG	CRL1684_TRAC_Tcell_19bp.bam	None	None	None_None_chr8:104473608-104473630_40	CAGGGTTCTGGATATCTGTNGG	CAGGGTTCTGGATATCTGTNGG
chr8	111226746	111226768	chr8:111226746-111226768	12	+	0	CTGGGACCCAGATATCTGTAGT	6		CRL1684_TRAC_Tcell_19bp.bam	None	None	None_None_chr8:111226746-111226768_12	CAGGGTTCTGGATATCTGTNGG	none
chr8	112083629	112083650	chr8:112083629-112083650	62	+	0			CAGGGTTCAGGATA-CAGTAGG	CRL1684_TRAC_Tcell_19bp.bam	None	None	None_None_chr8:112083629-112083650_62	CAGGGTTCTGGATATCTGTNGG	CAGGGTTCTGGATATCTGTNGG
chr8	118376414	118376436	chr8:118376414-118376436	62	-	0	CATGGGGTGGGATATCTGTGGG	5		CRL1684_TRAC_Tcell_19bp.bam	None	None	None_None_chr8:118376414-118376436_62	CAGGGTTCTGGATATCTGTNGG	none
chr8	118638189	118638211	chr8:118638189-118638211	12	+	0	TAGGGTTCTCTCTATCTGCTGG	5		CRL1684_TRAC_Tcell_19bp.bam	None	None	None_None_chr8:118638189-118638211_12	CAGGGTTCTGGATATCTGTNGG	none
chr8	120688460	120688482	chr8:120688460-120688482	12	+	0	CAAAGTTCTAGATATCTGGGGT	5	CAAAGTTCTAGATATCTG-GGG	CRL1684_TRAC_Tcell_19bp.bam	None	None	None_None_chr8:120688460-120688482_12	CAGGGTTCTGGATATCTGTNGG	CAGGGTTCTGGATATCTGTNGG
chr8	121931659	121931681	chr8:121931659-121931681	10	+	0	CGAGCATTTGGATATCTGCTGG	6		CRL1684_TRAC_Tcell_19bp.bam	None	None	None_None_chr8:121931659-121931681_10	CAGGGTTCTGGATATCTGTNGG	none
chr8	123636924	123636946	chr8:123636924-123636946	10	+	0	GAGGCTCATGGATATCTTTAGG	5		CRL1684_TRAC_Tcell_19bp.bam	None	None	None_None_chr8:123636924-123636946_10	CAGGGTTCTGGATATCTGTNGG	none
chr8	126226513	126226535	chr8:126226513-126226535	28	-	0	TCAGGGTCTTGATATCTGGGGG	6	CAGGGT-CTTGATATCTGGGGG	CRL1684_TRAC_Tcell_19bp.bam	None	None	None_None_chr8:126226513-126226535_28	CAGGGTTCTGGATATCTGTNGG	CAGGGTTCTGGATATCTGTNGG
chr8	129245427	129245449	chr8:129245427-129245449	18	+	0	AAGGTTTGTGTTTATATGTTGG	6		CRL1684_TRAC_Tcell_19bp.bam	None	None	None_None_chr8:129245427-129245449_18	CAGGGTTCTGGATATCTGTNGG	none
chr8	129448613	129448635	chr8:129448613-129448635	6	+	0	GAGGGCTATGGGAATCTGTGGC	6		CRL1684_TRAC_Tcell_19bp.bam	None	None	None_None_chr8:129448613-129448635_6	CAGGGTTCTGGATATCTGTNGG	none
chr8	131575624	131575646	chr8:131575624-131575646	8	+	0	AACCATTGTGGAAATCTGTGGG	6		CRL1684_TRAC_Tcell_19bp.bam	None	None	None_None_chr8:131575624-131575646_8	CAGGGTTCTGGATATCTGTNGG	none
chr8	13172352	13172374	chr8:13172352-13172374	80	-	0	CAAGGTACTGAATACCTGTTGG	4		CRL1684_TRAC_Tcell_19bp.bam	None	None	None_None_chr8:13172352-13172374_80	CAGGGTTCTGGATATCTGTNGG	none
chr8	132076473	132076495	chr8:132076473-132076495	8	+	0	CCTGTTTGTGGATATCTGGGGG	5		CRL1684_TRAC_Tcell_19bp.bam	None	None	None_None_chr8:132076473-132076495_8	CAGGGTTCTGGATATCTGTNGG	none
chr8	132741782	132741804	chr8:132741782-132741804	10	+	0	TAGGCCTCTGGATAACTGTGGG	4		CRL1684_TRAC_Tcell_19bp.bam	None	None	None_None_chr8:132741782-132741804_10	CAGGGTTCTGGATATCTGTNGG	none
chr8	132914214	132914236	chr8:132914214-132914236	76	+	0	CTGGGATATGGATATCTTTGGG	4		CRL1684_TRAC_Tcell_19bp.bam	None	None	None_None_chr8:132914214-132914236_76	CAGGGTTCTGGATATCTGTNGG	none
chr8	133875134	133875156	chr8:133875134-133875156	16	-	0	AAGGGTTCTGGACGTTGGTTGC	6		CRL1684_TRAC_Tcell_19bp.bam	None	None	None_None_chr8:133875134-133875156_16	CAGGGTTCTGGATATCTGTNGG	none
chr8	135149266	135149288	chr8:135149266-135149288	52	+	0	AGAGGTTATAGTTATCTGTGGG	6	CAGAGGTTATAGTTATCTGTGGG	CRL1684_TRAC_Tcell_19bp.bam	None	None	None_None_chr8:135149266-135149288_52	CAGGGTTCTGGATATCTGTNGG	CAG-GGTTCTGGATATCTGTNGG
chr8	143369604	143369626	chr8:143369604-143369626	8	+	0	CAGGGCTGTGGAGACCTGCTGA	6		CRL1684_TRAC_Tcell_19bp.bam	None	None	None_None_chr8:143369604-143369626_8	CAGGGTTCTGGATATCTGTNGG	none
chr8	143512201	143512223	chr8:143512201-143512223	10	+	0	CAGGGTGACGGATGGCTGTGGG	5		CRL1684_TRAC_Tcell_19bp.bam	None	None	None_None_chr8:143512201-143512223_10	CAGGGTTCTGGATATCTGTNGG	none
chr8	143737522	143737544	chr8:143737522-143737544	16	-	0	CTGGATGCAGGGTATCTGTGGG	5		CRL1684_TRAC_Tcell_19bp.bam	None	None	None_None_chr8:143737522-143737544_16	CAGGGTTCTGGATATCTGTNGG	none
chr8	15257235	15257257	chr8:15257235-15257257	24	-	0	GGGGAATCCAGATATCTGTTGG	6		CRL1684_TRAC_Tcell_19bp.bam	None	None	None_None_chr8:15257235-15257257_24	CAGGGTTCTGGATATCTGTNGG	none
chr8	16817533	16817555	chr8:16817533-16817555	14	-	0	CATGGTTATAAGTATCTGTAGG	5		CRL1684_TRAC_Tcell_19bp.bam	None	None	None_None_chr8:16817533-16817555_14	CAGGGTTCTGGATATCTGTNGG	none
chr8	18531360	18531381	chr8:18531360-18531381	584	+	0			GTGGGTTCTGGATA-CTGTAGG	CRL1684_TRAC_Tcell_19bp.bam	None	None	None_None_chr8:18531360-18531381_584	CAGGGTTCTGGATATCTGTNGG	CAGGGTTCTGGATATCTGTNGG
chr8	18882875	18882897	chr8:18882875-18882897	36	-	0	CAGATATATGGATATCTGTGTG	5		CRL1684_TRAC_Tcell_19bp.bam	None	None	None_None_chr8:18882875-18882897_36	CAGGGTTCTGGATATCTGTNGG	none
chr8	21034275	21034296	chr8:21034275-21034296	12	+	0			AAGGATTCTGGTT-TCTGTGGG	CRL1684_TRAC_Tcell_19bp.bam	None	None	None_None_chr8:21034275-21034296_12	CAGGGTTCTGGATATCTGTNGG	CAGGGTTCTGGATATCTGTNGG
chr8	22833141	22833163	chr8:22833141-22833163	32	+	0	CCTGTTTCTAGATATCTGTGAG	5		CRL1684_TRAC_Tcell_19bp.bam	None	None	None_None_chr8:22833141-22833163_32	CAGGGTTCTGGATATCTGTNGG	none
chr8	28922057	28922079	chr8:28922057-28922079	10	+	0	GTTGGTTCTGTATATCTGTTGG	4		CRL1684_TRAC_Tcell_19bp.bam	None	None	None_None_chr8:28922057-28922079_10	CAGGGTTCTGGATATCTGTNGG	none
chr8	31238645	31238667	chr8:31238645-31238667	8	-	0	TTGCTATCTGGATATCTTTTGG	6		CRL1684_TRAC_Tcell_19bp.bam	None	None	None_None_chr8:31238645-31238667_8	CAGGGTTCTGGATATCTGTNGG	none
chr8	31884242	31884264	chr8:31884242-31884264	10	+	0	CAGGATTTTGAATAACTTTGGG	5		CRL1684_TRAC_Tcell_19bp.bam	None	None	None_None_chr8:31884242-31884264_10	CAGGGTTCTGGATATCTGTNGG	none
chr8	33915372	33915394	chr8:33915372-33915394	210	-	0	CAGGATTCTAAATATCTGCAGG	4		CRL1684_TRAC_Tcell_19bp.bam	None	None	None_None_chr8:33915372-33915394_210	CAGGGTTCTGGATATCTGTNGG	none
chr8	34156996	34157018	chr8:34156996-34157018	10	+	0	GATGATTTAGGATATCTGGTGG	6		CRL1684_TRAC_Tcell_19bp.bam	None	None	None_None_chr8:34156996-34157018_10	CAGGGTTCTGGATATCTGTNGG	none
chr8	35972118	35972140	chr8:35972118-35972140	6	-	0	CTAGGAGGTGGATATCTTTGGG	6		CRL1684_TRAC_Tcell_19bp.bam	None	None	None_None_chr8:35972118-35972140_6	CAGGGTTCTGGATATCTGTNGG	none
chr8	36030700	36030722	chr8:36030700-36030722	14	-	0	GAGTTCTCTAGATATCTGTTGG	5		CRL1684_TRAC_Tcell_19bp.bam	None	None	None_None_chr8:36030700-36030722_14	CAGGGTTCTGGATATCTGTNGG	none
chr8	3731013	3731035	chr8:3731013-3731035	6	-	0	CTGAGTGATGGGTATCTGTAGG	5		CRL1684_TRAC_Tcell_19bp.bam	None	None	None_None_chr8:3731013-3731035_6	CAGGGTTCTGGATATCTGTNGG	none
chr8	40151998	40152020	chr8:40151998-40152020	110	-	0	CAGCTATATGGATATCTGTAGG	4		CRL1684_TRAC_Tcell_19bp.bam	None	None	None_None_chr8:40151998-40152020_110	CAGGGTTCTGGATATCTGTNGG	none
chr8	40559795	40559817	chr8:40559795-40559817	10	-	0	TGTGGTTGTGTATATCTGTGTG	6		CRL1684_TRAC_Tcell_19bp.bam	None	None	None_None_chr8:40559795-40559817_10	CAGGGTTCTGGATATCTGTNGG	none
chr8	4289201	4289223	chr8:4289201-4289223	18	+	0	CCAGTTTCTAGATACCTGTCGG	5	CAGT-TTCTAGATACCTGTCGG	CRL1684_TRAC_Tcell_19bp.bam	None	None	None_None_chr8:4289201-4289223_18	CAGGGTTCTGGATATCTGTNGG	CAGGGTTCTGGATATCTGTNGG
chr8	4552494	4552516	chr8:4552494-4552516	56	-	0	CAGAGTTCTGCATATATCTGGG	4		CRL1684_TRAC_Tcell_19bp.bam	None	None	None_None_chr8:4552494-4552516_56	CAGGGTTCTGGATATCTGTNGG	none
chr8	49138735	49138757	chr8:49138735-49138757	10	-	0	ATGGGCTCTGTGTATCTGTTGG	5		CRL1684_TRAC_Tcell_19bp.bam	None	None	None_None_chr8:49138735-49138757_10	CAGGGTTCTGGATATCTGTNGG	none
chr8	49886896	49886918	chr8:49886896-49886918	16	-	0	TCAGGTCCTGCATATCAGTGGG	6	CAGG-TCCTGCATATCAGTGGG	CRL1684_TRAC_Tcell_19bp.bam	None	None	None_None_chr8:49886896-49886918_16	CAGGGTTCTGGATATCTGTNGG	CAGGGTTCTGGATATCTGTNGG
chr8	52120017	52120039	chr8:52120017-52120039	12	-	0	TATGGTCCTGGGTAACTGTTGG	5		CRL1684_TRAC_Tcell_19bp.bam	None	None	None_None_chr8:52120017-52120039_12	CAGGGTTCTGGATATCTGTNGG	none
chr8	54346399	54346421	chr8:54346399-54346421	16	+	0	CAGAGTATTGGATATCTATTAT	6		CRL1684_TRAC_Tcell_19bp.bam	None	None	None_None_chr8:54346399-54346421_16	CAGGGTTCTGGATATCTGTNGG	none
chr8	56865486	56865508	chr8:56865486-56865508	8	-	0	CTTGTCTCAGGATATCTTTTGG	6		CRL1684_TRAC_Tcell_19bp.bam	None	None	None_None_chr8:56865486-56865508_8	CAGGGTTCTGGATATCTGTNGG	none
chr8	57205071	57205093	chr8:57205071-57205093	20	+	0	CGACGTTCCTGATAGCTGTGGG	6		CRL1684_TRAC_Tcell_19bp.bam	None	None	None_None_chr8:57205071-57205093_20	CAGGGTTCTGGATATCTGTNGG	none
chr8	58633605	58633627	chr8:58633605-58633627	18	-	0	CAGGGCTCTGGCAATCTAGGGA	6		CRL1684_TRAC_Tcell_19bp.bam	None	None	None_None_chr8:58633605-58633627_18	CAGGGTTCTGGATATCTGTNGG	none
chr8	60788756	60788778	chr8:60788756-60788778	118	+	0	AAGGGTACTGGATATCTTGGTG	5	AAGGGTACTGGATATCT-TGGT	CRL1684_TRAC_Tcell_19bp.bam	None	None	None_None_chr8:60788756-60788778_118	CAGGGTTCTGGATATCTGTNGG	CAGGGTTCTGGATATCTGTNGG
chr8	6280404	6280426	chr8:6280404-6280426	50	-	0	CAAGTCTTAGGATATCTGTGGG	5		CRL1684_TRAC_Tcell_19bp.bam	None	None	None_None_chr8:6280404-6280426_50	CAGGGTTCTGGATATCTGTNGG	none
chr8	65468682	65468704	chr8:65468682-65468704	484	-	0	CAAGGATTCTGGTATCTGTTGG	6	AAGGATTCTGG-TATCTGTTGG	CRL1684_TRAC_Tcell_19bp.bam	None	None	None_None_chr8:65468682-65468704_484	CAGGGTTCTGGATATCTGTNGG	CAGGGTTCTGGATATCTGTNGG
chr8	66198328	66198350	chr8:66198328-66198350	26	-	0	GAGGTAGATGGATATCTGTTAG	6		CRL1684_TRAC_Tcell_19bp.bam	None	None	None_None_chr8:66198328-66198350_26	CAGGGTTCTGGATATCTGTNGG	none
chr8	72990693	72990715	chr8:72990693-72990715	16	+	0	GATGATTTAGGATATCTGGTGG	6		CRL1684_TRAC_Tcell_19bp.bam	None	None	None_None_chr8:72990693-72990715_16	CAGGGTTCTGGATATCTGTNGG	none
chr8	81010013	81010036	chr8:81010013-81010036	26	+	0			CAGGGTATCTGAATATATGTTTG	CRL1684_TRAC_Tcell_19bp.bam	None	None	None_None_chr8:81010013-81010036_26	CAGGGTTCTGGATATCTGTNGG	CAGGGT-TCTGGATATCTGTNGG
chr8	81374076	81374098	chr8:81374076-81374098	8	+	0	ATAAGTCCTGGATATCTGAAGG	6		CRL1684_TRAC_Tcell_19bp.bam	None	None	None_None_chr8:81374076-81374098_8	CAGGGTTCTGGATATCTGTNGG	none
chr8	82683842	82683864	chr8:82683842-82683864	16	+	0	TCTTATTCTGGATACCTGTTGG	6		CRL1684_TRAC_Tcell_19bp.bam	None	None	None_None_chr8:82683842-82683864_16	CAGGGTTCTGGATATCTGTNGG	none
chr8	85920226	85920248	chr8:85920226-85920248	44	-	0	GAGCCCTGTGGATATCTGGGGG	6		CRL1684_TRAC_Tcell_19bp.bam	None	None	None_None_chr8:85920226-85920248_44	CAGGGTTCTGGATATCTGTNGG	none
chr8	86222002	86222024	chr8:86222002-86222024	10	-	0	CAAGCTTCTGAGTGTCTGTGGG	5		CRL1684_TRAC_Tcell_19bp.bam	None	None	None_None_chr8:86222002-86222024_10	CAGGGTTCTGGATATCTGTNGG	none
chr8	91405627	91405649	chr8:91405627-91405649	14	+	0	AAGGATTTTAGATACCTGTGGG	5		CRL1684_TRAC_Tcell_19bp.bam	None	None	None_None_chr8:91405627-91405649_14	CAGGGTTCTGGATATCTGTNGG	none
chr8	93097301	93097323	chr8:93097301-93097323	8	+	0	TTAGGGGCTGGATATCTTTAGG	6	TAGGGG-CTGGATATCTTTAGG	CRL1684_TRAC_Tcell_19bp.bam	None	None	None_None_chr8:93097301-93097323_8	CAGGGTTCTGGATATCTGTNGG	CAGGGTTCTGGATATCTGTNGG
chr8	93260118	93260140	chr8:93260118-93260140	6	+	0	TCAGGACCTGGATATCTCTGGG	6	CAGGAC-CTGGATATCTCTGGG	CRL1684_TRAC_Tcell_19bp.bam	None	None	None_None_chr8:93260118-93260140_6	CAGGGTTCTGGATATCTGTNGG	CAGGGTTCTGGATATCTGTNGG
chr8	95123377	95123399	chr8:95123377-95123399	12	+	0	CATGATTTAGGGTATCTGGTGG	6		CRL1684_TRAC_Tcell_19bp.bam	None	None	None_None_chr8:95123377-95123399_12	CAGGGTTCTGGATATCTGTNGG	none
chr8	95515058	95515080	chr8:95515058-95515080	12	+	0	CAAAGTTCTAGAAATCTCTAGG	5		CRL1684_TRAC_Tcell_19bp.bam	None	None	None_None_chr8:95515058-95515080_12	CAGGGTTCTGGATATCTGTNGG	none
chr8	9695754	9695776	chr8:9695754-9695776	20	+	0	TTGGATTCTGGATATATTTTGG	5		CRL1684_TRAC_Tcell_19bp.bam	None	None	None_None_chr8:9695754-9695776_20	CAGGGTTCTGGATATCTGTNGG	none
chr8	97420854	97420876	chr8:97420854-97420876	14	-	0	GATACTTCTGGATATCTGTGGA	5		CRL1684_TRAC_Tcell_19bp.bam	None	None	None_None_chr8:97420854-97420876_14	CAGGGTTCTGGATATCTGTNGG	none
chr8	98507807	98507829	chr8:98507807-98507829	6	-	0	GAGCCATCCGGATATCTGAAGG	6		CRL1684_TRAC_Tcell_19bp.bam	None	None	None_None_chr8:98507807-98507829_6	CAGGGTTCTGGATATCTGTNGG	none
chr9	103581788	103581810	chr9:103581788-103581810	12	-	0	CCCTGCTCTGGATATCTGTGGA	5		CRL1684_TRAC_Tcell_19bp.bam	None	None	None_None_chr9:103581788-103581810_12	CAGGGTTCTGGATATCTGTNGG	none
chr9	105567013	105567035	chr9:105567013-105567035	14	-	0	GTTGGTTCTGTTTATATGTTGG	6		CRL1684_TRAC_Tcell_19bp.bam	None	None	None_None_chr9:105567013-105567035_14	CAGGGTTCTGGATATCTGTNGG	none
chr9	10778113	10778135	chr9:10778113-10778135	6	+	0	CAGGGCCCTAAAAATCTGTAGG	5		CRL1684_TRAC_Tcell_19bp.bam	None	None	None_None_chr9:10778113-10778135_6	CAGGGTTCTGGATATCTGTNGG	none
chr9	113341218	113341240	chr9:113341218-113341240	6	-	0	TAGGGTTCAAAATAAATGTTGG	6		CRL1684_TRAC_Tcell_19bp.bam	None	None	None_None_chr9:113341218-113341240_6	CAGGGTTCTGGATATCTGTNGG	none
chr9	118397908	118397930	chr9:118397908-118397930	12	+	0	CAGAGTAAAGGATGTCTGTTGG	5		CRL1684_TRAC_Tcell_19bp.bam	None	None	None_None_chr9:118397908-118397930_12	CAGGGTTCTGGATATCTGTNGG	none
chr9	119084200	119084222	chr9:119084200-119084222	10	+	0	CAGTGTTCCGATTATCTGTTGG	4		CRL1684_TRAC_Tcell_19bp.bam	None	None	None_None_chr9:119084200-119084222_10	CAGGGTTCTGGATATCTGTNGG	none
chr9	119937453	119937475	chr9:119937453-119937475	16	-	0	CTAGGTTCTGGATATCCCTTGG	4		CRL1684_TRAC_Tcell_19bp.bam	None	None	None_None_chr9:119937453-119937475_16	CAGGGTTCTGGATATCTGTNGG	none
chr9	121243440	121243462	chr9:121243440-121243462	22	+	0	TTAGGATCTGGTTATCTGTAGG	5	TAGGAT-CTGGTTATCTGTAGG	CRL1684_TRAC_Tcell_19bp.bam	None	None	None_None_chr9:121243440-121243462_22	CAGGGTTCTGGATATCTGTNGG	CAGGGTTCTGGATATCTGTNGG
chr9	122434539	122434561	chr9:122434539-122434561	12	+	0	GATGGTTTAGGATATCTGGTGG	5		CRL1684_TRAC_Tcell_19bp.bam	None	None	None_None_chr9:122434539-122434561_12	CAGGGTTCTGGATATCTGTNGG	none
chr9	123614494	123614516	chr9:123614494-123614516	6	-	0	CAGAGCCCTGGTTATCTGGGGG	5		CRL1684_TRAC_Tcell_19bp.bam	None	None	None_None_chr9:123614494-123614516_6	CAGGGTTCTGGATATCTGTNGG	none
chr9	125209795	125209817	chr9:125209795-125209817	12	+	0	CTGGCTTCTCTATATCTTTCAG	6		CRL1684_TRAC_Tcell_19bp.bam	None	None	None_None_chr9:125209795-125209817_12	CAGGGTTCTGGATATCTGTNGG	none
chr9	128267244	128267266	chr9:128267244-128267266	20	+	0	CAGGGCTACCGCTAGCTGTTGG	6		CRL1684_TRAC_Tcell_19bp.bam	None	None	None_None_chr9:128267244-128267266_20	CAGGGTTCTGGATATCTGTNGG	none
chr9	128681552	128681574	chr9:128681552-128681574	14	+	0	GCACGTTATGCATATCTGTTGG	6	CACG-TTATGCATATCTGTTGG	CRL1684_TRAC_Tcell_19bp.bam	None	None	None_None_chr9:128681552-128681574_14	CAGGGTTCTGGATATCTGTNGG	CAGGGTTCTGGATATCTGTNGG
chr9	131517628	131517650	chr9:131517628-131517650	28	+	0	CTGTGCTCTGCATATCTGTGTG	5		CRL1684_TRAC_Tcell_19bp.bam	None	None	None_None_chr9:131517628-131517650_28	CAGGGTTCTGGATATCTGTNGG	none
chr9	132402216	132402238	chr9:132402216-132402238	24	-	0	AGGAGTCCTGGCTTTCTGTGGG	6		CRL1684_TRAC_Tcell_19bp.bam	None	None	None_None_chr9:132402216-132402238_24	CAGGGTTCTGGATATCTGTNGG	none
chr9	1332509	1332531	chr9:1332509-1332531	8	+	0	CTTTGTTAAGGTTATCTGTGGG	6		CRL1684_TRAC_Tcell_19bp.bam	None	None	None_None_chr9:1332509-1332531_8	CAGGGTTCTGGATATCTGTNGG	none
chr9	133343176	133343198	chr9:133343176-133343198	22	+	0	GCTGGCTCTGGATATCTGTGGC	5	CTGGCT-CTGGATATCTGTGGC	CRL1684_TRAC_Tcell_19bp.bam	None	None	None_None_chr9:133343176-133343198_22	CAGGGTTCTGGATATCTGTNGG	CAGGGTTCTGGATATCTGTNGG
chr9	135074020	135074042	chr9:135074020-135074042	26	+	0	CCTTGTTCTGGATATCCCTGGG	5		CRL1684_TRAC_Tcell_19bp.bam	None	None	None_None_chr9:135074020-135074042_26	CAGGGTTCTGGATATCTGTNGG	none
chr9	136105691	136105713	chr9:136105691-136105713	6	+	0	CAGGGCCTGGGACATCTGTGGG	5		CRL1684_TRAC_Tcell_19bp.bam	None	None	None_None_chr9:136105691-136105713_6	CAGGGTTCTGGATATCTGTNGG	none
chr9	137015208	137015230	chr9:137015208-137015230	14	-	0	CTGGGCCCAGGATACCTGCTGG	6		CRL1684_TRAC_Tcell_19bp.bam	None	None	None_None_chr9:137015208-137015230_14	CAGGGTTCTGGATATCTGTNGG	none
chr9	137722766	137722788	chr9:137722766-137722788	6	+	0	GAGTGTGCTCTGTATCTGTGGG	6		CRL1684_TRAC_Tcell_19bp.bam	None	None	None_None_chr9:137722766-137722788_6	CAGGGTTCTGGATATCTGTNGG	none
chr9	19961909	19961931	chr9:19961909-19961931	58	-	0	TCTGGTTCAGGGTATCTGTTGG	5	CTGG-TTCAGGGTATCTGTTGG	CRL1684_TRAC_Tcell_19bp.bam	None	None	None_None_chr9:19961909-19961931_58	CAGGGTTCTGGATATCTGTNGG	CAGGGTTCTGGATATCTGTNGG
chr9	26613840	26613862	chr9:26613840-26613862	12	+	0	TAGGCCTCTGGATAACTGTGGG	4		CRL1684_TRAC_Tcell_19bp.bam	None	None	None_None_chr9:26613840-26613862_12	CAGGGTTCTGGATATCTGTNGG	none
chr9	2798283	2798305	chr9:2798283-2798305	18	-	0	TCTAGTTCTAAATATCTGTTGG	6		CRL1684_TRAC_Tcell_19bp.bam	None	None	None_None_chr9:2798283-2798305_18	CAGGGTTCTGGATATCTGTNGG	none
chr9	34803418	34803440	chr9:34803418-34803440	10	-	0	CTGCGTCCAGGATGTCTGTGGG	5		CRL1684_TRAC_Tcell_19bp.bam	None	None	None_None_chr9:34803418-34803440_10	CAGGGTTCTGGATATCTGTNGG	none
chr9	35242377	35242399	chr9:35242377-35242399	10	-	0	AAAAGTTCTGGATATCTGTTGC	4		CRL1684_TRAC_Tcell_19bp.bam	None	None	None_None_chr9:35242377-35242399_10	CAGGGTTCTGGATATCTGTNGG	none
chr9	3971655	3971677	chr9:3971655-3971677	12	+	0	CAGGCCTATGGTTATCTGATTG	6		CRL1684_TRAC_Tcell_19bp.bam	None	None	None_None_chr9:3971655-3971677_12	CAGGGTTCTGGATATCTGTNGG	none
chr9	40922849	40922871	chr9:40922849-40922871	10	-	0	CAGTGTTCTGGAATCCTATGTG	6		CRL1684_TRAC_Tcell_19bp.bam	None	None	None_None_chr9:40922849-40922871_10	CAGGGTTCTGGATATCTGTNGG	none
chr9	4669842	4669864	chr9:4669842-4669864	20	+	0	TTAGGATGTGGATATCTTTGGG	6		CRL1684_TRAC_Tcell_19bp.bam	None	None	None_None_chr9:4669842-4669864_20	CAGGGTTCTGGATATCTGTNGG	none
chr9	60523070	60523092	chr9:60523070-60523092	44	-	0	CGAGGGTCTGAATGTCTGTCGG	5	GAGGGT-CTGAATGTCTGTCGG	CRL1684_TRAC_Tcell_19bp.bam	None	None	None_None_chr9:60523070-60523092_44	CAGGGTTCTGGATATCTGTNGG	CAGGGTTCTGGATATCTGTNGG
chr9	68789513	68789535	chr9:68789513-68789535	8	+	0	GAGGGGTAGGGATAACTGGAGG	6		CRL1684_TRAC_Tcell_19bp.bam	None	None	None_None_chr9:68789513-68789535_8	CAGGGTTCTGGATATCTGTNGG	none
chr9	70647474	70647496	chr9:70647474-70647496	10	-	0	AAGGGATGTTGAATTCTGTTGG	6		CRL1684_TRAC_Tcell_19bp.bam	None	None	None_None_chr9:70647474-70647496_10	CAGGGTTCTGGATATCTGTNGG	none
chr9	77295270	77295292	chr9:77295270-77295292	12	+	0	AAGGGAAGTAGATATCTGTAAG	6		CRL1684_TRAC_Tcell_19bp.bam	None	None	None_None_chr9:77295270-77295292_12	CAGGGTTCTGGATATCTGTNGG	none
chr9	93181840	93181862	chr9:93181840-93181862	6	-	0	CAGGTCACTGGATATCTCTGAG	5		CRL1684_TRAC_Tcell_19bp.bam	None	None	None_None_chr9:93181840-93181862_6	CAGGGTTCTGGATATCTGTNGG	none
chr9	99326126	99326148	chr9:99326126-99326148	18	-	0	CTGGGCTATGTGTACCTGTGGG	6		CRL1684_TRAC_Tcell_19bp.bam	None	None	None_None_chr9:99326126-99326148_18	CAGGGTTCTGGATATCTGTNGG	none
chrX	100091613	100091635	chrX:100091613-100091635	34	-	0	CTGGTTTGAAGATATCTGTAGG	5		CRL1684_TRAC_Tcell_19bp.bam	None	None	None_None_chrX:100091613-100091635_34	CAGGGTTCTGGATATCTGTNGG	none
chrX	103359597	103359619	chrX:103359597-103359619	8	-	0	CAAGTCTAGGGATATCTGTTGA	6		CRL1684_TRAC_Tcell_19bp.bam	None	None	None_None_chrX:103359597-103359619_8	CAGGGTTCTGGATATCTGTNGG	none
chrX	105864291	105864313	chrX:105864291-105864313	22	+	0	GAGGTCTTGAGATATCTGTGGG	6		CRL1684_TRAC_Tcell_19bp.bam	None	None	None_None_chrX:105864291-105864313_22	CAGGGTTCTGGATATCTGTNGG	none
chrX	107728927	107728949	chrX:107728927-107728949	34	+	0	ATGGGTCCTGGTTATCTGGTGG	5		CRL1684_TRAC_Tcell_19bp.bam	None	None	None_None_chrX:107728927-107728949_34	CAGGGTTCTGGATATCTGTNGG	none
chrX	108159227	108159249	chrX:108159227-108159249	6	-	0	CAGGGGCTAGAATATCTGTGAG	6		CRL1684_TRAC_Tcell_19bp.bam	None	None	None_None_chrX:108159227-108159249_6	CAGGGTTCTGGATATCTGTNGG	none
chrX	112164260	112164282	chrX:112164260-112164282	8	-	0	CAGGGGCTGGGATACCTGTGGG	5		CRL1684_TRAC_Tcell_19bp.bam	None	None	None_None_chrX:112164260-112164282_8	CAGGGTTCTGGATATCTGTNGG	none
chrX	127285848	127285870	chrX:127285848-127285870	14	-	0	GATATTTTTGGATATCTGTTAG	6		CRL1684_TRAC_Tcell_19bp.bam	None	None	None_None_chrX:127285848-127285870_14	CAGGGTTCTGGATATCTGTNGG	none
chrX	129137539	129137561	chrX:129137539-129137561	8	+	0	AAGGACTCTGGAAGTCTGTAGG	5		CRL1684_TRAC_Tcell_19bp.bam	None	None	None_None_chrX:129137539-129137561_8	CAGGGTTCTGGATATCTGTNGG	none
chrX	129996159	129996181	chrX:129996159-129996181	16	+	0	AAGAGCTCTGGGTCTCTATTGG	6		CRL1684_TRAC_Tcell_19bp.bam	None	None	None_None_chrX:129996159-129996181_16	CAGGGTTCTGGATATCTGTNGG	none
chrX	130574630	130574652	chrX:130574630-130574652	6	-	0	CAGAGACCTACATATCTGTTGG	5		CRL1684_TRAC_Tcell_19bp.bam	None	None	None_None_chrX:130574630-130574652_6	CAGGGTTCTGGATATCTGTNGG	none
chrX	137944685	137944707	chrX:137944685-137944707	20	-	0	TAAGATTCTGTATTTCTATTGG	6		CRL1684_TRAC_Tcell_19bp.bam	None	None	None_None_chrX:137944685-137944707_20	CAGGGTTCTGGATATCTGTNGG	none
chrX	147343458	147343480	chrX:147343458-147343480	8	-	0	AAGGGTTGCAGATATCCATGGG	6		CRL1684_TRAC_Tcell_19bp.bam	None	None	None_None_chrX:147343458-147343480_8	CAGGGTTCTGGATATCTGTNGG	none
chrX	152001675	152001697	chrX:152001675-152001697	20	-	0	ATGAAAACTGGATATCTGTGGG	6		CRL1684_TRAC_Tcell_19bp.bam	None	None	None_None_chrX:152001675-152001697_20	CAGGGTTCTGGATATCTGTNGG	none
chrX	152458191	152458213	chrX:152458191-152458213	6	-	0	CTGGATTCTGGACATCTCTTGG	4		CRL1684_TRAC_Tcell_19bp.bam	None	None	None_None_chrX:152458191-152458213_6	CAGGGTTCTGGATATCTGTNGG	none
chrX	17972929	17972951	chrX:17972929-17972951	38	+	0	TAGAGATCTGAATATCTGTGGG	4		CRL1684_TRAC_Tcell_19bp.bam	None	None	None_None_chrX:17972929-17972951_38	CAGGGTTCTGGATATCTGTNGG	none
chrX	19650870	19650892	chrX:19650870-19650892	30	-	0	CAGGATTCAGGATAACTGTGTG	4		CRL1684_TRAC_Tcell_19bp.bam	None	None	None_None_chrX:19650870-19650892_30	CAGGGTTCTGGATATCTGTNGG	none
chrX	22355898	22355920	chrX:22355898-22355920	10	-	0	GAAGGGTCTGGATATCTTGGGG	5	GAAGGGTCTGGATATCT-TGGG	CRL1684_TRAC_Tcell_19bp.bam	None	None	None_None_chrX:22355898-22355920_10	CAGGGTTCTGGATATCTGTNGG	CAGGGTTCTGGATATCTGTNGG
chrX	33177786	33177808	chrX:33177786-33177808	86	-	0	GTAGGTTCTGGATATCTGTTGC	4	TAGG-TTCTGGATATCTGTTGC	CRL1684_TRAC_Tcell_19bp.bam	None	None	None_None_chrX:33177786-33177808_86	CAGGGTTCTGGATATCTGTNGG	CAGGGTTCTGGATATCTGTNGG
chrX	428423	428445	chrX:428423-428445	28	+	0	ACGGGCTCTGGAGGTCTGTTGG	5	CACGGGCTCTGGAGGTCTGTTGG	CRL1684_TRAC_Tcell_19bp.bam	None	None	None_None_chrX:428423-428445_28	CAGGGTTCTGGATATCTGTNGG	CA-GGGTTCTGGATATCTGTNGG
chrX	4930475	4930497	chrX:4930475-4930497	76	-	0	CAGGATTCAGGATATGTGTGGG	3		CRL1684_TRAC_Tcell_19bp.bam	None	None	None_None_chrX:4930475-4930497_76	CAGGGTTCTGGATATCTGTNGG	none
chrX	50337204	50337226	chrX:50337204-50337226	46	+	0	TAGGAGTATGGATATCTGGTGG	5		CRL1684_TRAC_Tcell_19bp.bam	None	None	None_None_chrX:50337204-50337226_46	CAGGGTTCTGGATATCTGTNGG	none
chrX	51626973	51626995	chrX:51626973-51626995	16	-	0	TTTGGTTCTGTATATATGTTGG	5		CRL1684_TRAC_Tcell_19bp.bam	None	None	None_None_chrX:51626973-51626995_16	CAGGGTTCTGGATATCTGTNGG	none
chrX	54412661	54412683	chrX:54412661-54412683	12	+	0	CAGTGCTGTGGATATCTAGAGG	5		CRL1684_TRAC_Tcell_19bp.bam	None	None	None_None_chrX:54412661-54412683_12	CAGGGTTCTGGATATCTGTNGG	none
chrX	56628760	56628783	chrX:56628760-56628783	6	-	0			CAGAGTTCTGTAATATCTGTTGG	CRL1684_TRAC_Tcell_19bp.bam	None	None	None_None_chrX:56628760-56628783_6	CAGGGTTCTGGATATCTGTNGG	CAGGGTTCTGGA-TATCTGTNGG
chrX	57048229	57048251	chrX:57048229-57048251	8	-	0	CATTGGTCTATATATCTGTTTG	6		CRL1684_TRAC_Tcell_19bp.bam	None	None	None_None_chrX:57048229-57048251_8	CAGGGTTCTGGATATCTGTNGG	none
chrX	63778712	63778734	chrX:63778712-63778734	6	-	0	GATGATTTAGGATATCTGGTGG	6		CRL1684_TRAC_Tcell_19bp.bam	None	None	None_None_chrX:63778712-63778734_6	CAGGGTTCTGGATATCTGTNGG	none
chrX	64198287	64198309	chrX:64198287-64198309	20	-	0	GAGGGTGAAGGATATCTGTTGA	5		CRL1684_TRAC_Tcell_19bp.bam	None	None	None_None_chrX:64198287-64198309_20	CAGGGTTCTGGATATCTGTNGG	none
chrX	66156900	66156922	chrX:66156900-66156922	12	+	0	ATGCCTTCTGGATGTCTGTGGG	5	CATGCCTTCTGGATGTCTGTGGG	CRL1684_TRAC_Tcell_19bp.bam	None	None	None_None_chrX:66156900-66156922_12	CAGGGTTCTGGATATCTGTNGG	CAGGG-TTCTGGATATCTGTNGG
chrX	80949555	80949577	chrX:80949555-80949577	38	+	0	CAAGATTCTAGATATCCATGGG	5		CRL1684_TRAC_Tcell_19bp.bam	None	None	None_None_chrX:80949555-80949577_38	CAGGGTTCTGGATATCTGTNGG	none
chrX	82257465	82257487	chrX:82257465-82257487	10	+	0	TAAGGTTCTGAATATCTGTTAG	4		CRL1684_TRAC_Tcell_19bp.bam	None	None	None_None_chrX:82257465-82257487_10	CAGGGTTCTGGATATCTGTNGG	none
chrX	82642360	82642382	chrX:82642360-82642382	18	-	0	TAAGGCTCTGGATATCTGATGG	4		CRL1684_TRAC_Tcell_19bp.bam	None	None	None_None_chrX:82642360-82642382_18	CAGGGTTCTGGATATCTGTNGG	none
chrX	84883517	84883539	chrX:84883517-84883539	8	+	0	GATTATTTAGGATATCTGTGGG	6		CRL1684_TRAC_Tcell_19bp.bam	None	None	None_None_chrX:84883517-84883539_8	CAGGGTTCTGGATATCTGTNGG	none
chrX	85953699	85953721	chrX:85953699-85953721	6	+	0	GGGGTAACTGGATATCTGTATG	6		CRL1684_TRAC_Tcell_19bp.bam	None	None	None_None_chrX:85953699-85953721_6	CAGGGTTCTGGATATCTGTNGG	none
chrX	86126915	86126937	chrX:86126915-86126937	28	+	0	GAGGGTTCCAAATATCCGTGGG	5		CRL1684_TRAC_Tcell_19bp.bam	None	None	None_None_chrX:86126915-86126937_28	CAGGGTTCTGGATATCTGTNGG	none
chrX	87140582	87140604	chrX:87140582-87140604	6	-	0	CCAGGTTCTGGGTATCTGTGGA	4	CAGG-TTCTGGGTATCTGTGGA	CRL1684_TRAC_Tcell_19bp.bam	None	None	None_None_chrX:87140582-87140604_6	CAGGGTTCTGGATATCTGTNGG	CAGGGTTCTGGATATCTGTNGG
chrX	87310113	87310135	chrX:87310113-87310135	12	+	0	CAAAGTTCCAGAGATCTCTGGG	6		CRL1684_TRAC_Tcell_19bp.bam	None	None	None_None_chrX:87310113-87310135_12	CAGGGTTCTGGATATCTGTNGG	none
chrY	10150196	10150218	chrY:10150196-10150218	18	+	0	TGGGATGAGGGATATCTGTGGG	6		CRL1684_TRAC_Tcell_19bp.bam	None	None	None_None_chrY:10150196-10150218_18	CAGGGTTCTGGATATCTGTNGG	none
chrY	14481556	14481578	chrY:14481556-14481578	6	-	0	GATTATTATGGATATCTGATGG	6		CRL1684_TRAC_Tcell_19bp.bam	None	None	None_None_chrY:14481556-14481578_6	CAGGGTTCTGGATATCTGTNGG	none
